# Supplementary material for: Cell-autonomous regulation of epithelial cell quiescence by calcium channel Trpv6
Source: eLife. 2019 Sep 17;8:e48003. doi: 10.7554/eLife.48003 (PMC6764821; doi:10.7554/eLife.48003)
Supplement: Figure 1—source data 1. [file elife-48003-fig1-data1.xlsx]

## Sheet: Sheet1
	Figure 1C				Figure 1D				Figure 1F
	Days elapsed	Siblings	trpv6 Δ8-/-		Days elapsed	Siblings	trpv6 Δ7-/-		Time	Trpv6
	8	1			9		1		0	0.615464	1.27403	1.1894	0.899441	0.778474	0.744789	1.81305	1.82217	0.887418	1.34573	1.70224	1.45597	1.41373	1.60268	0.970051	0.806261	1.32339	1.8987	1.63148	1.15274	1.91904	1.26538	0.81367	0.580523	1.0784	1.08835	1.19581	1.25463	1.02016	1.67789	1.85062	0.792001	1.0233	0.96779	1.58651	1.1088	1.67335	2.21589	1.74241	1.64518
	8		1		9		1		1.78596	0.618446	1.27183	1.18502	0.899028	0.777179	0.74513	1.79841	1.81465	0.88989	1.34533	1.71134	1.45371	1.40836	1.59977	0.967141	0.805613	1.32712	1.89868	1.61852	1.15552	1.90843	1.26021	0.812109	0.578038	1.07424	1.08668	1.19034	1.24964	1.01313	1.67507	1.84728	0.792812	1.02175	0.962703	1.57222	1.10788	1.6699	2.21353	1.73369	1.6492
	9		1		10		1		3.57116	0.616607	1.27153	1.18245	0.900019	0.778395	0.743443	1.7986	1.81324	0.888081	1.34417	1.70794	1.45031	1.40329	1.5947	0.963633	0.804887	1.31571	1.89602	1.62727	1.15128	1.89642	1.26264	0.814109	0.580915	1.07827	1.08875	1.19312	1.25903	1.0197	1.67242	1.84366	0.792582	1.0205	0.963426	1.58632	1.10882	1.66352	2.19921	1.73237	1.64828
	10		1		11		1		5.35761	0.616306	1.26986	1.17714	0.896081	0.776383	0.744481	1.79662	1.80917	0.889474	1.34037	1.70306	1.45154	1.39917	1.59573	0.965831	0.804613	1.31906	1.89678	1.62561	1.14948	1.89281	1.25622	0.809735	0.580252	1.07625	1.08351	1.19352	1.24599	1.01327	1.67036	1.84152	0.791557	1.01964	0.966248	1.58334	1.10186	1.65973	2.19192	1.73262	1.64757
	11		1		12		1		7.1436	0.61821	1.2707	1.18154	0.897974	0.775829	0.743304	1.8017	1.81257	0.888103	1.33621	1.70862	1.45037	1.39774	1.60048	0.963542	0.802633	1.31838	1.89807	1.61915	1.14849	1.89711	1.25839	0.813426	0.579411	1.07561	1.08742	1.19387	1.24942	1.01643	1.68045	1.8416	0.791001	1.01824	0.964871	1.58199	1.10338	1.65271	2.20504	1.73181	1.6489
	11		1		12		1		8.92959	0.617797	1.2699	1.17883	0.898842	0.776943	0.743463	1.79004	1.80668	0.885414	1.3383	1.71553	1.44952	1.3989	1.59457	0.964281	0.801826	1.31259	1.89684	1.62153	1.14704	1.89744	1.25284	0.812914	0.577903	1.07751	1.08168	1.19333	1.24714	1.01319	1.67002	1.83571	0.78876	1.01439	0.964547	1.58017	1.10569	1.65246	2.21192	1.73143	1.647
	11		1		12		1		10.7152	0.619584	1.26959	1.175	0.898125	0.779711	0.742091	1.79207	1.80975	0.885487	1.34649	1.71551	1.44589	1.38681	1.60191	0.966921	0.80344	1.31603	1.90015	1.61821	1.14818	1.89139	1.26039	0.812555	0.578682	1.07697	1.08081	1.1959	1.25298	1.00851	1.66337	1.83092	0.789058	1.01854	0.961044	1.58553	1.1085	1.65328	2.20648	1.72512	1.64027
	11		1		12		1		12.5016	0.615811	1.26428	1.17471	0.8989	0.776331	0.742437	1.78457	1.80123	0.884678	1.33535	1.7082	1.44059	1.38271	1.59706	0.964025	0.800939	1.31264	1.8927	1.61291	1.14654	1.88683	1.25607	0.811567	0.57727	1.06906	1.07681	1.18943	1.24693	1.01125	1.66561	1.83492	0.78509	1.01633	0.962625	1.57862	1.10031	1.65183	2.19938	1.72427	1.64339
	12		1		12		1		14.2892	0.617843	1.26798	1.17509	0.900508	0.775459	0.741472	1.7832	1.80574	0.884445	1.34042	1.70047	1.44657	1.38353	1.60665	0.962069	0.801193	1.31262	1.89554	1.61277	1.14695	1.89044	1.25471	0.812528	0.577334	1.06689	1.08341	1.19374	1.24546	1.01001	1.67205	1.8202	0.786063	1.01038	0.959628	1.58568	1.10107	1.65316	2.2028	1.73263	1.64223
	12		1		12		1		16.0741	0.614174	1.26541	1.16989	0.898654	0.776417	0.742005	1.78298	1.8049	0.881933	1.33478	1.6992	1.43501	1.37757	1.60323	0.961118	0.8029	1.31653	1.89892	1.61286	1.14434	1.88674	1.24621	0.811782	0.578136	1.07333	1.07509	1.191	1.24506	1.00565	1.6767	1.81033	0.784446	1.01573	0.959843	1.57776	1.10183	1.64503	2.2044	1.72735	1.63525
	12		1		13		1		17.859	0.614754	1.26473	1.17022	0.901156	0.775831	0.740126	1.77918	1.80522	0.882096	1.32533	1.70064	1.44425	1.38519	1.59766	0.963653	0.801167	1.31115	1.89464	1.6106	1.14146	1.89229	1.24467	0.810807	0.575004	1.0684	1.08197	1.18914	1.24052	1.01067	1.66415	1.813	0.783736	1.01137	0.959671	1.5833	1.10395	1.645	2.20331	1.72873	1.63592
	12		1		13		1		19.644	0.615167	1.26392	1.17326	0.90451	0.775725	0.739622	1.78338	1.79758	0.881531	1.32758	1.68683	1.44101	1.38305	1.6071	0.964916	0.803958	1.3131	1.89852	1.618	1.14098	1.88113	1.2442	0.814033	0.577148	1.06973	1.0838	1.18744	1.24172	1.00736	1.67341	1.82769	0.786911	1.01313	0.963211	1.58366	1.10759	1.63868	2.21059	1.72763	1.63684
	13		1		13		1		21.4297	0.611967	1.2645	1.17066	0.902538	0.774114	0.739418	1.77518	1.79844	0.885135	1.32957	1.69659	1.44058	1.3784	1.60771	0.964095	0.804503	1.31203	1.89466	1.61942	1.13814	1.87982	1.24397	0.811661	0.576924	1.06832	1.07678	1.18997	1.24528	1.01088	1.67574	1.82416	0.787731	1.01117	0.963223	1.5794	1.10244	1.63992	2.20581	1.72583	1.63088
	13		1		14		1		23.2137	0.61539	1.26421	1.17099	0.908373	0.774961	0.73926	1.77519	1.79909	0.881612	1.32666	1.69541	1.43762	1.38239	1.61244	0.959006	0.800387	1.311	1.89662	1.61131	1.13384	1.87442	1.24856	0.810225	0.576381	1.07203	1.08041	1.18759	1.24141	1.01034	1.66863	1.81719	0.787753	1.0118	0.962751	1.58881	1.10082	1.64161	2.21116	1.72033	1.62527
	13		1		14		1		24.9992	0.615413	1.26098	1.17121	0.909418	0.773039	0.73815	1.78191	1.80199	0.883756	1.33091	1.70437	1.4362	1.38651	1.6136	0.960745	0.801637	1.31523	1.9009	1.61278	1.136	1.87773	1.24354	0.809755	0.575439	1.06872	1.07086	1.18999	1.2427	1.00403	1.67623	1.81918	0.789144	1.01224	0.9646	1.58776	1.10247	1.6378	2.21561	1.71794	1.63021
	13		1		14		1		26.7861	0.612658	1.26156	1.17262	0.909358	0.77427	0.740256	1.78187	1.80456	0.884853	1.33201	1.69975	1.43613	1.38175	1.61175	0.959169	0.802253	1.3148	1.90172	1.62018	1.13424	1.87831	1.24349	0.810222	0.574761	1.06947	1.07519	1.18988	1.2425	1.00813	1.68169	1.82464	0.788162	1.0163	0.966899	1.57845	1.09892	1.63824	2.20465	1.71888	1.62933
	13		1		12	1			28.5708	0.612798	1.26169	1.17027	0.909913	0.770816	0.737838	1.77998	1.79845	0.881127	1.33085	1.70704	1.43243	1.37553	1.60302	0.955947	0.801459	1.31164	1.89126	1.61435	1.13479	1.8723	1.24072	0.8064	0.574918	1.06664	1.07464	1.19134	1.24068	1.00191	1.68498	1.82443	0.789153	1.0103	0.961117	1.57808	1.09072	1.63704	2.21867	1.71554	1.62126
	13		1		12	1			30.3554	0.61218	1.25942	1.16676	0.912427	0.769931	0.73608	1.77464	1.79264	0.88089	1.324	1.70291	1.42944	1.36735	1.59853	0.956266	0.799328	1.3077	1.89304	1.6093	1.13421	1.87729	1.2442	0.805189	0.572597	1.06588	1.07238	1.18852	1.24062	1.00531	1.68056	1.8277	0.788511	1.00741	0.964378	1.58502	1.09107	1.62432	2.2033	1.70003	1.63253
	13		1		12	1			32.141	0.612539	1.25936	1.17074	0.915739	0.773019	0.738145	1.7791	1.79385	0.877877	1.32507	1.69961	1.43245	1.35949	1.59855	0.955238	0.802387	1.30449	1.88321	1.61013	1.13307	1.87083	1.24035	0.809324	0.577115	1.06612	1.07459	1.19139	1.24417	1.00511	1.67833	1.83091	0.78855	1.00607	0.965259	1.57672	1.09968	1.62358	2.21618	1.70416	1.61726
	13		1		13	1			33.9271	0.612044	1.2595	1.17268	0.922192	0.773215	0.737353	1.77921	1.79815	0.880418	1.32461	1.69755	1.43131	1.35973	1.60009	0.958168	0.800559	1.31395	1.8888	1.61031	1.13291	1.87627	1.24523	0.805224	0.577967	1.06841	1.08505	1.19576	1.24372	1.00439	1.67954	1.83635	0.788849	1.0069	0.963355	1.57916	1.09809	1.62941	2.20704	1.70787	1.6191
	13		1		14	0			35.7166	0.611169	1.25733	1.16863	0.924462	0.773595	0.739285	1.76961	1.79493	0.879489	1.32919	1.70091	1.42935	1.35851	1.59179	0.959605	0.799867	1.30533	1.88661	1.61006	1.13175	1.87356	1.23624	0.81072	0.575466	1.07231	1.08843	1.19018	1.24972	0.993623	1.68277	1.83852	0.789701	1.00731	0.964191	1.57926	1.09756	1.6331	2.20766	1.71185	1.61656
	13		1		14	0			37.5053	0.610738	1.25736	1.16906	0.929286	0.771162	0.735933	1.76928	1.79386	0.877496	1.32375	1.70684	1.42642	1.35019	1.59432	0.957273	0.799516	1.30193	1.88436	1.6071	1.13261	1.86423	1.24204	0.808105	0.572075	1.06965	1.08578	1.19142	1.24633	0.998446	1.6824	1.82913	0.789923	1.00911	0.955201	1.58314	1.09362	1.62348	2.21219	1.71144	1.61121
	13		1		14	0			39.2915	0.612355	1.25754	1.17088	0.932187	0.770893	0.738567	1.7621	1.79657	0.879936	1.32794	1.69015	1.42556	1.34495	1.59121	0.958092	0.801633	1.30116	1.88356	1.60815	1.13441	1.8764	1.23776	0.810788	0.574199	1.0695	1.0838	1.1872	1.24141	0.997004	1.67108	1.83714	0.788033	1.01037	0.953278	1.5809	1.09176	1.61934	2.19758	1.70369	1.60517
	13		1		14	0			41.0777	0.608973	1.25958	1.16824	0.939467	0.771804	0.735003	1.77139	1.79326	0.879091	1.32586	1.70201	1.42303	1.34409	1.59044	0.955663	0.799451	1.29904	1.88587	1.60718	1.13162	1.87917	1.23968	0.810905	0.573411	1.06654	1.08404	1.1835	1.23758	0.997594	1.67309	1.83267	0.789153	1.00859	0.956359	1.57241	1.09688	1.62059	2.20743	1.70655	1.60485
	13		1		14	0			42.8629	0.611837	1.25757	1.16713	0.941491	0.772258	0.73948	1.76735	1.79627	0.878646	1.33376	1.69284	1.41902	1.33883	1.5886	0.95892	0.799059	1.29924	1.88888	1.60548	1.13163	1.88562	1.23523	0.81083	0.574177	1.06503	1.08819	1.18135	1.23559	0.997212	1.67847	1.83369	0.788856	1.01337	0.955424	1.57614	1.09322	1.61944	2.21243	1.7024	1.59244
	13		1		14	0			44.6562	0.611787	1.2591	1.16073	0.942463	0.770625	0.733927	1.76661	1.79486	0.877098	1.32744	1.69212	1.42279	1.33652	1.58688	0.954638	0.798552	1.29823	1.88256	1.60497	1.1307	1.88358	1.23946	0.811486	0.573981	1.06076	1.08362	1.17993	1.23788	0.991871	1.66755	1.82289	0.78764	1.00969	0.953043	1.57359	1.09542	1.62082	2.21008	1.70326	1.59079
	13		1		14	0			46.4425	0.606858	1.2599	1.16354	0.944768	0.771494	0.737597	1.7557	1.79813	0.881926	1.33233	1.69724	1.41758	1.33394	1.57943	0.952842	0.795821	1.29515	1.88179	1.59767	1.13094	1.8607	1.23809	0.80273	0.572339	1.06126	1.07812	1.17632	1.2461	0.998102	1.66677	1.82651	0.786596	1.01065	0.957714	1.57372	1.09527	1.62181	2.21202	1.70753	1.588
	13		1		14	0			48.2273	0.608884	1.25656	1.15853	0.948993	0.767929	0.739503	1.76336	1.79441	0.875444	1.33243	1.69499	1.41599	1.32751	1.58896	0.953236	0.796698	1.29662	1.87368	1.59711	1.12878	1.86979	1.23802	0.80575	0.572808	1.0598	1.08323	1.17806	1.24212	0.995287	1.66346	1.81279	0.784746	1.01549	0.954081	1.56774	1.0991	1.6179	2.21801	1.70772	1.57827
	12	1			14	0			50.0171	0.609749	1.25699	1.15743	0.953908	0.767474	0.741016	1.77111	1.79973	0.880867	1.33458	1.69233	1.41415	1.33245	1.59277	0.949207	0.796197	1.29902	1.88074	1.60046	1.12904	1.89216	1.23734	0.806837	0.571749	1.06002	1.08263	1.17358	1.24228	0.995345	1.66592	1.81557	0.785616	1.01551	0.950138	1.57276	1.09458	1.61942	2.21455	1.71374	1.5746
	12	1			14	0			51.8034	0.608995	1.25625	1.15919	0.952864	0.76801	0.744346	1.7625	1.79505	0.877877	1.32854	1.69835	1.41418	1.33231	1.59111	0.95218	0.794316	1.29462	1.88482	1.59361	1.1262	1.88271	1.22642	0.804386	0.572825	1.06228	1.0782	1.17864	1.24369	0.987114	1.66406	1.80695	0.786718	1.01242	0.952612	1.5719	1.09607	1.61644	2.22111	1.70984	1.56544
	12	1			14	0			53.5901	0.609416	1.25384	1.1547	0.953065	0.768023	0.7472	1.75415	1.79603	0.881006	1.33988	1.70851	1.41064	1.33789	1.58462	0.951756	0.792925	1.2996	1.88639	1.5948	1.12789	1.89525	1.23292	0.804983	0.571003	1.06532	1.08007	1.1785	1.24502	0.991707	1.66982	1.8103	0.788261	1.01332	0.952908	1.57202	1.09815	1.61876	2.21088	1.71026	1.56749
	13	0			14	0			55.3779	0.607541	1.25258	1.15502	0.958537	0.766556	0.750161	1.75767	1.79251	0.882033	1.33596	1.69974	1.41211	1.33901	1.59019	0.955074	0.79657	1.2945	1.88608	1.59578	1.13185	1.88302	1.23285	0.806255	0.573021	1.06248	1.07683	1.17938	1.23427	0.990196	1.66696	1.81568	0.7894	1.0091	0.949543	1.56802	1.09531	1.61443	2.21415	1.71085	1.55926
	13	0			14	0			57.17	0.606084	1.25476	1.15529	0.959991	0.768205	0.751468	1.74977	1.79652	0.88476	1.331	1.69735	1.40855	1.34376	1.59536	0.952458	0.798674	1.29717	1.88772	1.59198	1.13129	1.88285	1.24039	0.805812	0.572999	1.06479	1.07413	1.18022	1.24105	0.995795	1.66856	1.82048	0.788603	1.01447	0.948503	1.57188	1.10259	1.61897	2.21507	1.71312	1.55643
	13	0			14	0			58.9584	0.60194	1.24059	1.13969	0.947876	0.761727	0.745555	1.73242	1.76676	0.874005	1.32372	1.66811	1.38936	1.32433	1.57605	0.944202	0.788025	1.2761	1.86002	1.57761	1.11486	1.86011	1.23196	0.795146	0.56766	1.04943	1.05891	1.16723	1.22294	0.978787	1.65179	1.79094	0.780967	1.00392	0.934109	1.55549	1.09106	1.59571	2.18994	1.69032	1.53908
	13	0			8		1		60.7449	0.602508	1.24102	1.14053	0.950533	0.761321	0.745634	1.72005	1.76635	0.87226	1.31587	1.67143	1.39065	1.32421	1.57912	0.941137	0.785002	1.27685	1.85923	1.57294	1.11623	1.84292	1.22477	0.794871	0.565556	1.0476	1.05774	1.16117	1.21991	0.97482	1.64836	1.79519	0.778738	1.00213	0.939257	1.5622	1.08838	1.59846	2.18502	1.68566	1.53992
	13	0			11		1		62.5308	0.598588	1.23771	1.14011	0.954473	0.75852	0.745121	1.72237	1.76409	0.872029	1.31983	1.67421	1.3882	1.32115	1.57735	0.94015	0.784912	1.26914	1.86138	1.57111	1.11714	1.84803	1.21934	0.794394	0.566515	1.04449	1.05473	1.15825	1.21885	0.979367	1.64885	1.79811	0.779203	0.999653	0.939096	1.5502	1.08443	1.59682	2.18465	1.68148	1.53614
	13	0			12		1		64.3162	0.600915	1.23398	1.1365	0.951615	0.758522	0.744885	1.71905	1.76043	0.871636	1.31547	1.6741	1.38639	1.32046	1.58075	0.938684	0.783883	1.27095	1.85623	1.5683	1.11719	1.85484	1.22117	0.791171	0.567541	1.04423	1.05107	1.16184	1.21445	0.979392	1.64206	1.78164	0.776621	0.999656	0.933959	1.54977	1.08459	1.58383	2.18278	1.67753	1.53053
	13	0			12		1		66.1019	0.602127	1.24004	1.14343	0.953123	0.765102	0.750438	1.73801	1.77921	0.874783	1.3337	1.67685	1.39924	1.32798	1.58712	0.944923	0.78842	1.27938	1.87348	1.58432	1.126	1.86297	1.22922	0.79436	0.568131	1.05164	1.05642	1.16218	1.22016	0.984053	1.66568	1.8084	0.777937	1.0063	0.941517	1.56143	1.08955	1.60052	2.19133	1.68893	1.53172
	13	0			12		1		67.8857	0.604251	1.24697	1.1456	0.95499	0.764896	0.751091	1.74546	1.78195	0.87833	1.32141	1.6809	1.40057	1.33519	1.59408	0.942574	0.790626	1.28507	1.87568	1.5916	1.13256	1.87664	1.2354	0.796522	0.566206	1.05168	1.05405	1.16121	1.22738	0.9844	1.66383	1.81517	0.777006	1.00313	0.945793	1.56115	1.09268	1.60356	2.19682	1.69059	1.53015
	13	0			13		1		69.671	0.605605	1.24804	1.14561	0.9603	0.768135	0.751994	1.75913	1.78482	0.87486	1.33386	1.68419	1.40149	1.33577	1.59435	0.945959	0.790122	1.28368	1.87558	1.59749	1.13013	1.87623	1.23137	0.79782	0.570024	1.05334	1.06119	1.16564	1.22569	0.992449	1.66946	1.82477	0.780833	1.00423	0.948871	1.56613	1.09059	1.61319	2.21285	1.68873	1.53081
	13	0			13		1		71.4536	0.608048	1.24635	1.14573	0.960431	0.768934	0.754367	1.75957	1.78998	0.8815	1.32923	1.68547	1.40142	1.34021	1.59217	0.949419	0.791948	1.2844	1.88007	1.59077	1.13293	1.86722	1.23384	0.799836	0.568604	1.05666	1.06635	1.17046	1.23453	0.986307	1.66825	1.81966	0.783385	1.01001	0.942925	1.56265	1.0974	1.60932	2.20668	1.69306	1.5295
	13	0			13		1		73.2389	0.608437	1.25057	1.14526	0.960576	0.770393	0.753426	1.75241	1.78471	0.875965	1.32891	1.68453	1.40227	1.34187	1.59777	0.949756	0.791551	1.28997	1.87805	1.59722	1.1308	1.8664	1.23496	0.798145	0.568941	1.05759	1.06025	1.16617	1.23092	0.987055	1.66402	1.82075	0.783852	1.00681	0.945254	1.5608	1.09147	1.60556	2.1963	1.69336	1.52934
	13	0			13		1		75.0235	0.605539	1.24871	1.14742	0.959247	0.769009	0.754373	1.75527	1.7916	0.876604	1.32397	1.69798	1.40292	1.34175	1.59857	0.950392	0.792466	1.2892	1.87767	1.58818	1.12925	1.87482	1.23723	0.798742	0.56994	1.05567	1.0669	1.16775	1.23146	0.989135	1.66775	1.82223	0.786809	1.01242	0.949355	1.57815	1.0988	1.61065	2.21753	1.69445	1.52365
	13	0			14		1		76.8084	0.602482	1.25101	1.14721	0.958852	0.768453	0.752729	1.75671	1.79354	0.874824	1.33071	1.68778	1.39946	1.33663	1.60048	0.950456	0.789428	1.29096	1.87222	1.58821	1.12395	1.87973	1.23098	0.797682	0.569741	1.05891	1.06752	1.17004	1.22627	0.987163	1.67314	1.81469	0.784089	1.01208	0.953596	1.57538	1.09476	1.60771	2.20572	1.68254	1.52281
	13	0			14		1		78.5946	0.603747	1.24508	1.14907	0.95818	0.771279	0.753055	1.75396	1.79332	0.879524	1.3297	1.69395	1.40244	1.33627	1.59639	0.94986	0.789781	1.29518	1.87169	1.58063	1.12645	1.87939	1.22836	0.79774	0.567623	1.05699	1.0638	1.16749	1.23252	0.991489	1.67793	1.81589	0.78501	1.01252	0.956095	1.57626	1.09094	1.60893	2.20537	1.6898	1.52147
	13	0			14	0			80.3808	0.604046	1.24594	1.14679	0.959625	0.771064	0.753081	1.75376	1.79562	0.880776	1.3272	1.6967	1.40061	1.33674	1.59107	0.952226	0.790785	1.2915	1.87048	1.58136	1.12171	1.88122	1.23345	0.795837	0.568273	1.05423	1.068	1.16462	1.23444	0.989685	1.6779	1.8131	0.786246	1.01677	0.955827	1.57034	1.0968	1.60793	2.20669	1.68636	1.5234
	13	0			14	0			82.167	0.606128	1.24359	1.14479	0.959113	0.770226	0.753188	1.75324	1.79485	0.879803	1.32508	1.68559	1.39708	1.34131	1.58712	0.949385	0.788101	1.29289	1.86528	1.57752	1.12183	1.87589	1.23309	0.796806	0.56834	1.05737	1.06367	1.16301	1.22657	0.987032	1.67641	1.82103	0.786723	1.01757	0.951462	1.57414	1.09114	1.61159	2.19881	1.67515	1.53348
	13	0			14	0			83.952	0.603691	1.25137	1.15151	0.960252	0.769988	0.753598	1.75111	1.79312	0.88076	1.32756	1.69955	1.40379	1.34035	1.58532	0.94937	0.788982	1.29504	1.86718	1.58	1.12226	1.86757	1.23429	0.79705	0.567353	1.05732	1.0645	1.16654	1.2331	0.982626	1.67136	1.82009	0.786326	1.01472	0.953551	1.58053	1.09106	1.60972	2.20321	1.67922	1.54316
	13	0			14	0			85.7361	0.603493	1.24649	1.14689	0.96289	0.768169	0.74926	1.75009	1.79378	0.880584	1.33234	1.68561	1.39888	1.33438	1.5822	0.947964	0.790188	1.29093	1.86536	1.57728	1.12014	1.85327	1.23312	0.796904	0.566174	1.06162	1.06466	1.16391	1.23842	0.987077	1.67114	1.81208	0.787088	1.01244	0.949598	1.56542	1.08713	1.60878	2.21028	1.67303	1.54106
	13	0			14	0			87.5214	0.605498	1.2429	1.14669	0.956632	0.765919	0.75057	1.74379	1.79426	0.880587	1.32692	1.68199	1.40123	1.33939	1.58777	0.947645	0.790678	1.28951	1.85949	1.5783	1.11698	1.85929	1.22917	0.795262	0.568269	1.057	1.06719	1.16627	1.23504	0.986981	1.66573	1.81488	0.786202	1.01839	0.951312	1.57215	1.08507	1.61311	2.20171	1.67501	1.53835
	13	0			14	0			89.3062	0.605117	1.2462	1.14829	0.96211	0.766551	0.747716	1.74265	1.79038	0.878181	1.31326	1.67607	1.39952	1.33934	1.57817	0.946913	0.788089	1.28878	1.86136	1.58637	1.11345	1.844	1.23002	0.798648	0.565397	1.05643	1.06989	1.16774	1.2382	0.989514	1.66513	1.81179	0.787801	1.02328	0.951735	1.57109	1.08981	1.61414	2.21118	1.67721	1.53692
	13	0			14	0			91.0915	0.605404	1.24499	1.15075	0.962948	0.767137	0.747446	1.74187	1.79546	0.881056	1.32122	1.67932	1.40126	1.33981	1.58166	0.947741	0.789066	1.29427	1.85852	1.58252	1.11246	1.8453	1.22876	0.799305	0.57031	1.05668	1.07238	1.16844	1.23887	0.985134	1.66376	1.81972	0.787937	1.01543	0.951046	1.57608	1.08453	1.61251	2.2248	1.68017	1.54086
	13	0			14	0			92.8773	0.604197	1.24428	1.15007	0.967452	0.766696	0.747159	1.74145	1.79153	0.879617	1.30729	1.67313	1.39434	1.34452	1.58505	0.950339	0.78788	1.29221	1.85993	1.57487	1.1119	1.8536	1.22972	0.79781	0.566876	1.0534	1.07715	1.1625	1.2342	0.984535	1.65051	1.80804	0.786759	1.02083	0.948314	1.56376	1.08461	1.61106	2.20584	1.67009	1.53197
	13	0			14	0			94.6615	0.604295	1.2462	1.14613	0.960801	0.76485	0.742773	1.74808	1.78799	0.87912	1.32529	1.67766	1.39503	1.34264	1.58263	0.946797	0.785579	1.29179	1.85541	1.57114	1.11275	1.84476	1.22283	0.795707	0.566779	1.05145	1.07352	1.15911	1.22724	0.992182	1.64564	1.81026	0.786416	1.01885	0.945379	1.57197	1.08432	1.606	2.20239	1.67004	1.53445
	13	0			14	0			96.4454	0.604245	1.24564	1.14526	0.967975	0.764737	0.742933	1.75523	1.78898	0.884813	1.32449	1.67516	1.39827	1.3477	1.58469	0.947692	0.788214	1.28457	1.84671	1.57078	1.10987	1.84569	1.21953	0.794282	0.566979	1.04971	1.07229	1.15728	1.23657	0.988761	1.65814	1.81486	0.787136	1.02295	0.947134	1.56704	1.08627	1.61092	2.1996	1.67752	1.5414
	13	0			14	0			98.23	0.600337	1.24473	1.14764	0.964588	0.763592	0.741005	1.74376	1.78405	0.880594	1.3164	1.6737	1.39394	1.34741	1.58177	0.94673	0.783929	1.28804	1.84882	1.57513	1.10574	1.86274	1.22207	0.795565	0.566557	1.04756	1.0705	1.15661	1.23208	0.982036	1.64883	1.79781	0.784177	1.02056	0.945754	1.56724	1.08316	1.60671	2.1929	1.67376	1.53639
	13	0							100.016	0.603085	1.24831	1.1456	0.965691	0.762629	0.736817	1.74753	1.78679	0.885714	1.32105	1.6743	1.39472	1.33938	1.57396	0.94865	0.784062	1.2936	1.85142	1.56862	1.1059	1.86715	1.2171	0.796893	0.567195	1.04868	1.06787	1.15633	1.23336	0.985715	1.65004	1.79943	0.785952	1.02226	0.943811	1.56826	1.08463	1.60722	2.2059	1.66854	1.5358
	13	0							101.801	0.606158	1.24605	1.1435	0.973736	0.763315	0.737369	1.75074	1.78618	0.882762	1.323	1.67703	1.40107	1.34293	1.57297	0.95035	0.785683	1.29017	1.8504	1.57488	1.10618	1.86017	1.21921	0.79443	0.566317	1.05392	1.06894	1.15351	1.23871	0.989213	1.66108	1.80605	0.783991	1.02228	0.945223	1.56224	1.08765	1.60726	2.20445	1.67531	1.53444
									103.586	0.601262	1.24409	1.14242	0.976173	0.761275	0.736818	1.75251	1.78705	0.879014	1.32225	1.67766	1.39606	1.3478	1.58726	0.948012	0.785275	1.30016	1.855	1.56931	1.10455	1.87733	1.21635	0.79236	0.565814	1.04808	1.06626	1.14726	1.23733	0.992051	1.65737	1.79816	0.783991	1.01732	0.940355	1.56332	1.08273	1.60348	2.20108	1.67187	1.53245
									105.371	0.59997	1.24477	1.14131	0.977818	0.764449	0.736771	1.7502	1.78715	0.882457	1.32205	1.68997	1.39472	1.34953	1.57545	0.949347	0.785258	1.29447	1.85372	1.57719	1.10564	1.87792	1.21639	0.789247	0.566223	1.04564	1.06416	1.15274	1.23108	0.990946	1.65503	1.78953	0.782189	1.01955	0.942539	1.56399	1.07711	1.60966	2.20866	1.67017	1.53295
	Figure 1G								107.156	0.601007	1.24499	1.14133	0.980579	0.763018	0.733047	1.74321	1.78418	0.882239	1.32852	1.68024	1.39747	1.34798	1.57908	0.94926	0.785846	1.29366	1.85009	1.56918	1.10395	1.86935	1.21741	0.791586	0.563209	1.04451	1.06449	1.15013	1.23507	0.985907	1.65778	1.80398	0.783984	1.01192	0.941495	1.56732	1.08679	1.60644	2.20545	1.66983	1.52754
	Trpv6	Trpv6D539A	TRPV6						108.941	0.600107	1.24374	1.14	0.979212	0.762135	0.730118	1.7438	1.7827	0.879323	1.32176	1.68314	1.39105	1.34777	1.5789	0.951127	0.783354	1.28734	1.84552	1.56818	1.10044	1.87403	1.21492	0.789867	0.565423	1.04486	1.05796	1.14911	1.22759	0.989004	1.6629	1.79332	0.782469	1.01467	0.940354	1.56636	1.08692	1.60565	2.20803	1.67033	1.53368
	0.10483	0.00284265	0.183524						110.727	0.60137	1.24686	1.13929	0.981456	0.762067	0.727604	1.74587	1.78632	0.881829	1.3317	1.68776	1.3933	1.35567	1.58232	0.947847	0.782003	1.28574	1.85329	1.56916	1.10342	1.87337	1.20995	0.788033	0.564409	1.04654	1.06008	1.15423	1.23356	0.989517	1.6666	1.80111	0.785219	1.02119	0.939829	1.56971	1.0828	1.60182	2.20145	1.66221	1.53017
	0.0907272	0.00163719	0.150399						112.511	0.600552	1.2499	1.13644	0.981219	0.761097	0.726642	1.74019	1.78456	0.876837	1.32929	1.69164	1.39122	1.3542	1.58004	0.947146	0.786524	1.28844	1.84754	1.57767	1.10566	1.86423	1.21625	0.792518	0.564439	1.04686	1.06093	1.14889	1.24098	0.985003	1.66829	1.80083	0.78447	1.01775	0.936661	1.57421	1.08267	1.60545	2.20444	1.66696	1.53407
	0.0856976		0.181867						114.296	0.599489	1.24656	1.13386	0.980797	0.76197	0.722207	1.7394	1.78412	0.876803	1.33303	1.69356	1.39327	1.34716	1.56799	0.946889	0.783509	1.28252	1.83886	1.57173	1.10289	1.86275	1.21598	0.790014	0.564237	1.04566	1.05458	1.14698	1.2332	0.984063	1.67276	1.80695	0.782131	1.01165	0.937377	1.57068	1.0888	1.60262	2.2023	1.66075	1.5338
									116.081	0.599726	1.2455	1.13274	0.980986	0.761247	0.719723	1.74086	1.78037	0.876857	1.319	1.6965	1.39364	1.34149	1.57971	0.949647	0.783246	1.28606	1.83773	1.57406	1.10828	1.85569	1.21103	0.788436	0.564824	1.04394	1.05485	1.14674	1.23057	0.986634	1.67032	1.80298	0.78086	1.01508	0.941027	1.56651	1.08259	1.60833	2.20757	1.65735	1.54319
									117.865	0.599274	1.24641	1.13668	0.98711	0.765315	0.717365	1.73718	1.78378	0.876325	1.31952	1.70143	1.39504	1.3454	1.58534	0.951166	0.784839	1.28116	1.83389	1.57265	1.11555	1.86334	1.21306	0.785997	0.562573	1.04698	1.05412	1.14782	1.2352	0.98611	1.67678	1.81224	0.780133	1.0117	0.937952	1.58156	1.08482	1.60892	2.2015	1.6623	1.54309
									119.651	0.597511	1.24276	1.12985	0.984969	0.762709	0.713737	1.74399	1.78715	0.877625	1.33112	1.6947	1.39145	1.34167	1.58102	0.949136	0.784988	1.2869	1.82927	1.57179	1.11427	1.85349	1.21612	0.786059	0.56299	1.03524	1.05361	1.14697	1.2301	0.987776	1.67924	1.81267	0.780943	1.0176	0.939294	1.574	1.08759	1.60586	2.20561	1.66275	1.53668
	Figure 1H								121.435	0.599625	1.24169	1.13219	0.984632	0.765147	0.71109	1.7435	1.78203	0.875324	1.33037	1.70262	1.39018	1.33848	1.5803	0.951405	0.781978	1.27495	1.83213	1.56382	1.11593	1.8465	1.21011	0.78334	0.560995	1.03691	1.05289	1.14699	1.22919	0.985797	1.66544	1.80148	0.781318	1.01452	0.93423	1.57579	1.08259	1.60248	2.20183	1.65153	1.53736
	Time	Trpv6	TRPV6	Trpv6 D539A					123.221	0.598723	1.243	1.13147	0.98598	0.76309	0.708607	1.74348	1.78683	0.873902	1.33821	1.70857	1.38904	1.34078	1.57149	0.946735	0.781805	1.27731	1.82828	1.56373	1.11555	1.8327	1.20985	0.782911	0.559573	1.04199	1.05111	1.14979	1.2346	0.986477	1.67338	1.80102	0.78213	1.01647	0.933598	1.57211	1.08211	1.60311	2.20199	1.6544	1.53264
	-119.88	-533.652	-2165.03	-45.7764					125.007	0.598667	1.2439	1.13166	0.988315	0.764185	0.70821	1.74786	1.78214	0.876633	1.32609	1.69419	1.38921	1.33583	1.57406	0.947566	0.784573	1.27689	1.83389	1.56271	1.11465	1.83895	1.2103	0.783487	0.562534	1.03952	1.05727	1.15533	1.23503	0.984875	1.67227	1.79738	0.784376	1.00874	0.933115	1.56797	1.08539	1.59853	2.1991	1.65752	1.52313
	-119.76	-530.75	-2148.85	-51.5747					126.795	0.599011	1.23157	1.11958	0.983325	0.760484	0.704779	1.73195	1.76232	0.871977	1.32003	1.67884	1.38033	1.31955	1.56855	0.942605	0.782815	1.27373	1.81553	1.55352	1.10757	1.8222	1.20641	0.780679	0.560811	1.03073	1.04427	1.14542	1.21804	0.976809	1.64809	1.77661	0.77395	1.00457	0.928448	1.55313	1.07817	1.58793	2.1888	1.63616	1.52319
	-119.64	-530.595	-2146.11	-51.8799					128.582	0.586224	1.17516	1.08037	0.961866	0.750324	0.689152	1.68057	1.69097	0.849835	1.26949	1.58008	1.33857	1.27164	1.54022	0.931579	0.770625	1.24198	1.76847	1.50229	1.08786	1.77232	1.19464	0.757828	0.556124	0.987182	1.00684	1.10977	1.16507	0.945669	1.55146	1.6829	0.733647	0.980632	0.911651	1.48462	1.04154	1.53899	2.17622	1.60762	1.50468
	-119.52	-534.102	-2138.48	-45.4712					130.366	0.578678	1.11986	1.03758	0.935097	0.736865	0.67411	1.62423	1.61372	0.832124	1.21182	1.47967	1.28659	1.20372	1.49351	0.909577	0.756307	1.20012	1.69783	1.42153	1.05571	1.69125	1.18355	0.737939	0.552535	0.940493	0.970551	1.08268	1.09854	0.899242	1.44179	1.5759	0.701192	0.948991	0.893468	1.42754	0.985561	1.48207	2.15585	1.5623	1.48912
	-119.4	-533.031	-2132.68	-48.2178					132.151	0.572314	1.06641	1.00806	0.913369	0.723802	0.65886	1.57433	1.55415	0.81646	1.1652	1.37521	1.24146	1.14132	1.44805	0.885005	0.746097	1.16156	1.62003	1.34873	1.0259	1.56367	1.16299	0.717265	0.548583	0.898527	0.932998	1.05869	1.04577	0.864879	1.34037	1.47713	0.67677	0.926543	0.872526	1.37877	0.9342	1.42067	2.15239	1.52961	1.46566
	-119.28	-522.195	-2123.22	-48.523					133.936	0.568105	1.0549	1.00534	0.90483	0.722105	0.653232	1.55529	1.54845	0.81598	1.13918	1.3592	1.21137	1.09421	1.41039	0.870812	0.735646	1.1293	1.56414	1.30554	0.999846	1.47231	1.16036	0.706238	0.547741	0.889668	0.92619	1.05384	1.07095	0.85891	1.33118	1.4688	0.675189	0.908644	0.862324	1.39358	0.927554	1.39339	2.1411	1.50966	1.4586
	-119.16	-519.293	-2122.61	-38.7573					135.722	0.570899	1.07556	1.02178	0.905524	0.726897	0.655466	1.56669	1.58546	0.82125	1.15997	1.41625	1.21974	1.0935	1.39479	0.872454	0.735303	1.13431	1.56009	1.32235	1.00008	1.47309	1.15114	0.707219	0.544962	0.909606	0.941609	1.05788	1.11237	0.885809	1.37061	1.5171	0.683839	0.899191	0.864918	1.41473	0.958797	1.40004	2.13936	1.51673	1.4574
	-119.04	-513.035	-2126.88	-47.6074					137.507	0.572053	1.08797	1.03268	0.905392	0.731487	0.657447	1.56877	1.61213	0.826031	1.16819	1.4538	1.22207	1.10334	1.41118	0.879407	0.735339	1.14428	1.5631	1.34368	1.00074	1.52981	1.1497	0.705713	0.545213	0.923114	0.941552	1.0622	1.1188	0.90065	1.36668	1.52489	0.681327	0.891203	0.86142	1.41333	0.978248	1.40025	2.15431	1.51853	1.45734
	-118.92	-517.457	-2098.5	-41.1987					139.291	0.569957	1.08	1.02759	0.893146	0.727863	0.654924	1.53472	1.5897	0.821253	1.15565	1.44607	1.20701	1.10482	1.40948	0.879165	0.732497	1.14992	1.54874	1.34662	0.996843	1.53679	1.15141	0.70024	0.542761	0.913152	0.933749	1.05195	1.1003	0.886995	1.33456	1.48921	0.671322	0.873934	0.850483	1.38882	0.97138	1.39189	2.15051	1.51605	1.45158
	-118.8	-524.016	-2092.4	-46.3867					141.076	0.569006	1.06361	1.01609	0.874168	0.721172	0.648988	1.49567	1.56006	0.817066	1.15969	1.45171	1.18622	1.09046	1.39882	0.873823	0.728207	1.13881	1.52662	1.3226	0.989884	1.50486	1.1401	0.688156	0.53921	0.894579	0.915024	1.03022	1.08006	0.86983	1.29207	1.45355	0.658374	0.852411	0.837118	1.3594	0.959184	1.36668	2.14213	1.49859	1.44802
	-118.68	-522.64	-2093.92	-44.8608					142.86	0.565626	1.04274	1.00372	0.861063	0.714462	0.642594	1.45403	1.52607	0.80829	1.13667	1.45368	1.16756	1.07085	1.37921	0.864958	0.724802	1.12538	1.49223	1.28977	0.972621	1.46646	1.13246	0.676351	0.537748	0.877919	0.901427	1.02048	1.05293	0.846954	1.24122	1.40607	0.644971	0.831419	0.82242	1.32835	0.936776	1.3351	2.13069	1.47834	1.43987
	-118.56	-519.128	-2093.92	-37.5366					144.645	0.5581	1.00484	0.982883	0.840132	0.706085	0.634963	1.40624	1.47608	0.795292	1.11316	1.39602	1.13293	1.03959	1.3464	0.848897	0.715697	1.09438	1.45023	1.2433	0.953913	1.40872	1.11332	0.658357	0.534141	0.840138	0.874565	0.994203	1.01436	0.818158	1.17318	1.33265	0.629993	0.80706	0.804519	1.28839	0.899284	1.28836	2.12943	1.45205	1.43659
	-118.44	-515.616	-2096.97	-42.1143					146.43	0.558457	0.979928	0.966718	0.820829	0.700687	0.629652	1.371	1.44798	0.791828	1.08869	1.35311	1.11919	1.01629	1.32573	0.83951	0.711078	1.08167	1.41871	1.20672	0.944802	1.35698	1.11169	0.6426	0.534377	0.823559	0.859104	0.988206	1.00151	0.796177	1.14042	1.28663	0.621338	0.793535	0.793704	1.27203	0.884294	1.26985	2.12206	1.44501	1.42234
	-118.32	-530.719	-2076.83	-39.6729					148.215	0.554457	0.956922	0.953339	0.805116	0.695324	0.624469	1.34082	1.42255	0.786371	1.07043	1.29501	1.10351	0.994772	1.30062	0.82787	0.705839	1.06415	1.39023	1.1853	0.929622	1.32169	1.09657	0.635027	0.5316	0.806309	0.846737	0.970437	0.98295	0.78459	1.10625	1.2445	0.612737	0.778495	0.786354	1.25488	0.867251	1.25263	2.1255	1.43057	1.41607
	-118.2	-512.864	-2082.33	-35.7056					150.001	0.549589	0.932203	0.941021	0.792148	0.691766	0.620198	1.31273	1.39401	0.781244	1.03844	1.24317	1.08745	0.97156	1.27898	0.816674	0.699108	1.04885	1.36361	1.16509	0.920933	1.27508	1.09068	0.622177	0.530958	0.788483	0.832134	0.959638	0.96938	0.766031	1.07676	1.21075	0.604691	0.765664	0.780239	1.24101	0.851152	1.23498	2.12396	1.41999	1.42309
	-118.08	-502.333	-2079.88	-40.5884					151.787	0.552542	0.912419	0.934358	0.781952	0.689176	0.618282	1.29365	1.3843	0.786864	1.03435	1.21695	1.08257	0.957884	1.27158	0.811362	0.699223	1.04256	1.35308	1.15221	0.911525	1.25964	1.08285	0.617466	0.530612	0.779034	0.826627	0.956536	0.967584	0.757638	1.06634	1.20324	0.598014	0.762981	0.777399	1.23948	0.844481	1.22738	2.11569	1.42672	1.42306
	-117.96	-514.69	-2075	-33.2642					153.573	0.553047	0.905281	0.92694	0.776914	0.687622	0.615107	1.28035	1.38133	0.788157	1.02269	1.19944	1.08203	0.950923	1.263	0.809179	0.697455	1.03796	1.34832	1.14942	0.913944	1.24213	1.08508	0.613987	0.531682	0.774311	0.825137	0.954768	0.963729	0.752935	1.05715	1.19359	0.594168	0.761973	0.774485	1.24024	0.845292	1.22215	2.1241	1.42512	1.42019
	-117.84	-518.502	-2051.2	-42.1143					155.357	0.553139	0.902105	0.929539	0.771378	0.689498	0.615395	1.28086	1.38689	0.791961	1.01947	1.19439	1.07987	0.948247	1.25955	0.807366	0.698671	1.04146	1.34737	1.15006	0.914098	1.24324	1.08149	0.614039	0.531316	0.773187	0.825328	0.957882	0.965524	0.750923	1.05808	1.20003	0.590727	0.758246	0.777114	1.23747	0.849749	1.22066	2.11983	1.42657	1.42488
	-117.72	-508.276	-2051.5	-37.8418					157.142	0.55558	0.904219	0.925709	0.76908	0.689098	0.616436	1.27269	1.39407	0.791605	1.01492	1.18659	1.08348	0.948849	1.26474	0.804599	0.697152	1.04321	1.34651	1.15767	0.912247	1.25947	1.07834	0.613102	0.533898	0.773052	0.824541	0.954983	0.972038	0.750902	1.05712	1.2029	0.587312	0.767788	0.77733	1.23578	0.85992	1.21832	2.11472	1.43137	1.43296
	-117.6	-512.698	-2046.93	-39.6729					158.935	0.554239	0.908629	0.926856	0.76598	0.688972	0.616383	1.27737	1.40183	0.794646	1.0131	1.18175	1.08355	0.953307	1.2657	0.80412	0.698405	1.04489	1.34501	1.1632	0.910465	1.26263	1.08425	0.613074	0.53296	0.771985	0.824745	0.955981	0.966178	0.753588	1.06125	1.19703	0.584302	0.781675	0.78067	1.23899	0.88759	1.22261	2.11559	1.43517	1.42308
	-117.48	-504.609	-2038.38	-35.4004					160.722	0.556948	0.907711	0.929846	0.763552	0.69087	0.618816	1.26436	1.40504	0.799094	1.02359	1.17536	1.08884	0.955369	1.26632	0.801095	0.699332	1.04436	1.34541	1.17246	0.910422	1.25799	1.0847	0.614047	0.533494	0.774415	0.822514	0.953395	0.976946	0.75739	1.05843	1.19239	0.583104	0.793405	0.778276	1.23846	0.898811	1.22364	2.12064	1.43741	1.43959
	-117.36	-502.928	-2035.63	-37.8418					162.508	0.557562	0.914703	0.929485	0.766576	0.691835	0.620327	1.25474	1.40684	0.80023	1.01538	1.17525	1.08633	0.960634	1.26088	0.802589	0.698067	1.04333	1.34058	1.17031	0.910474	1.32588	1.08567	0.613813	0.534579	0.774193	0.823002	0.955967	0.974178	0.758169	1.0583	1.18958	0.579306	0.809375	0.776514	1.24317	0.900289	1.22432	2.12033	1.43984	1.43969
	-117.24	-496.364	-2025.26	-42.1143					164.293	0.554832	0.916016	0.929893	0.772512	0.692303	0.620596	1.24738	1.40852	0.799736	1.01984	1.18544	1.0851	0.959988	1.26344	0.801266	0.693688	1.04407	1.33691	1.17486	0.91049	1.33749	1.08462	0.61094	0.533891	0.770883	0.822883	0.951533	0.970296	0.754929	1.05728	1.18448	0.576472	0.821469	0.776651	1.24303	0.901595	1.22315	2.12561	1.44057	1.43653
	-117.12	-497.124	-2022.51	-32.0435					166.078	0.554495	0.916354	0.924435	0.766647	0.692001	0.618926	1.2428	1.40382	0.799832	1.02233	1.18205	1.0864	0.962372	1.2614	0.799534	0.695832	1.04708	1.33726	1.17423	0.911833	1.34282	1.08507	0.612099	0.534421	0.769121	0.820901	0.954864	0.968684	0.75747	1.05599	1.17698	0.57519	0.821519	0.772203	1.23858	0.897084	1.2224	2.13146	1.43621	1.43398
	-117	-508.566	-2021.29	-39.6729					167.862	0.553681	0.916083	0.923218	0.769386	0.690142	0.620401	1.23223	1.40521	0.794426	1.01499	1.18952	1.08726	0.963292	1.26928	0.797504	0.691986	1.04248	1.33328	1.1739	0.906485	1.34574	1.08142	0.610145	0.533683	0.765235	0.818105	0.953167	0.963426	0.75793	1.05394	1.17444	0.573131	0.809098	0.772332	1.2472	0.89366	1.22237	2.12249	1.43718	1.43735
	-116.88	-508.716	-2010	-37.2315					169.646	0.555893	0.913497	0.922045	0.761882	0.689003	0.616724	1.22248	1.39694	0.791503	1.0179	1.18482	1.08428	0.967041	1.2578	0.794031	0.692545	1.04178	1.32881	1.18007	0.904212	1.32742	1.08386	0.608712	0.531807	0.762613	0.817906	0.950345	0.965524	0.760654	1.04479	1.16818	0.570699	0.80579	0.765595	1.24178	0.894815	1.22272	2.12008	1.43087	1.43535
	-116.76	-511.612	-2006.03	-36.6211					171.431	0.549798	0.912519	0.920287	0.759525	0.686647	0.617865	1.21044	1.39449	0.789777	1.01826	1.19001	1.08186	0.968939	1.25286	0.795054	0.6917	1.04399	1.32281	1.17806	0.905551	1.31469	1.08048	0.607282	0.532843	0.764058	0.815505	0.948148	0.972066	0.762584	1.04936	1.16241	0.570516	0.796336	0.762975	1.23191	0.890428	1.22073	2.11053	1.42658	1.43128
	-116.64	-510.542	-2002.67	-34.79					173.214	0.550111	0.908532	0.913502	0.757791	0.687029	0.618096	1.20371	1.39804	0.790527	1.01929	1.18289	1.07795	0.967427	1.2465	0.791538	0.690429	1.04023	1.32142	1.17231	0.904287	1.31342	1.0815	0.604707	0.531498	0.759316	0.811174	0.948141	0.967974	0.762603	1.03958	1.14884	0.567307	0.79095	0.765549	1.23373	0.890485	1.21597	2.10993	1.4219	1.43493
	-116.52	-520.457	-1995.96	-33.8745					174.999	0.547964	0.909501	0.911071	0.757294	0.68595	0.615621	1.1888	1.3917	0.789238	1.02376	1.18497	1.07682	0.964235	1.24345	0.790069	0.686988	1.04086	1.31911	1.17385	0.903178	1.31369	1.07426	0.601611	0.531699	0.754377	0.808619	0.944854	0.968519	0.763567	1.03735	1.1434	0.565735	0.786333	0.762815	1.23554	0.880432	1.21344	2.10599	1.41932	1.43983
	-116.4	-499.855	-1979.48	-31.4331					176.784	0.549079	0.909486	0.912207	0.752539	0.686171	0.615061	1.18013	1.396	0.785081	1.02328	1.19121	1.07571	0.96708	1.24988	0.790363	0.687001	1.03804	1.31695	1.17527	0.899776	1.30256	1.0773	0.602872	0.530842	0.75049	0.804608	0.947787	0.976281	0.762945	1.04334	1.14234	0.565224	0.787268	0.760093	1.23537	0.878629	1.21016	2.10906	1.40938	1.45813
	-116.28	-511.602	-1983.75	-37.8418					178.567	0.549005	0.909417	0.91012	0.751312	0.687602	0.61538	1.17515	1.40091	0.787994	1.01744	1.19384	1.0739	0.960174	1.24551	0.789224	0.685698	1.04062	1.31197	1.18375	0.902473	1.30082	1.0723	0.601429	0.529826	0.747768	0.800054	0.943513	0.971938	0.760022	1.05232	1.13976	0.563688	0.787136	0.758946	1.23349	0.876938	1.20768	2.10322	1.41604	1.46267
	-116.16	-508.395	-1968.5	-36.3159					180.353	0.544883	0.907173	0.904803	0.748919	0.685075	0.613384	1.16954	1.39287	0.782806	1.01654	1.19287	1.07252	0.958351	1.24584	0.784305	0.681727	1.03534	1.30344	1.1767	0.897621	1.29427	1.07075	0.598429	0.530155	0.745657	0.796426	0.937991	0.971076	0.755041	1.05947	1.13352	0.563104	0.776412	0.752309	1.23236	0.875917	1.2029	2.1089	1.41348	1.47171
	-116.04	-503.052	-1966.66	-41.1987					182.137	0.544602	0.905672	0.904893	0.748027	0.684346	0.612617	1.17731	1.39375	0.785825	1.01149	1.19332	1.06754	0.957954	1.2388	0.783739	0.682334	1.03741	1.30192	1.17425	0.892659	1.27289	1.06759	0.597852	0.530288	0.742634	0.795995	0.93726	0.969911	0.757755	1.06221	1.14134	0.561237	0.77514	0.747779	1.23136	0.872594	1.20179	2.10635	1.41035	1.48474
	-115.92	-502.286	-1967.88	-34.1797					183.922	0.542641	0.903509	0.900562	0.741179	0.684524	0.611365	1.17169	1.39445	0.784888	1.00932	1.19353	1.06396	0.955684	1.23413	0.782668	0.683909	1.03782	1.29868	1.17757	0.89598	1.27608	1.06266	0.596472	0.529095	0.749935	0.795962	0.934151	0.971223	0.756403	1.05865	1.131	0.559886	0.772533	0.747368	1.22041	0.869751	1.20184	2.1239	1.40374	1.47609
	-115.8	-493.586	-1950.49	-38.7573					185.707	0.544434	0.90015	0.897066	0.739036	0.68109	0.609239	1.15889	1.38641	0.781916	1.00681	1.18477	1.06152	0.951332	1.22731	0.780801	0.68655	1.03941	1.29392	1.18643	0.898472	1.27104	1.06515	0.596421	0.525751	0.748171	0.798379	0.930651	0.966189	0.753314	1.0554	1.12933	0.558272	0.766256	0.744427	1.221	0.868845	1.20095	2.10059	1.39274	1.47851
	-115.68	-497.703	-1959.03	-38.7573					187.492	0.539925	0.89979	0.895209	0.738273	0.678723	0.609483	1.15051	1.38347	0.7816	1.00247	1.17402	1.05995	0.948612	1.23303	0.783408	0.685392	1.04293	1.28601	1.18195	0.895426	1.27094	1.06707	0.596603	0.527136	0.750808	0.793787	0.931579	0.965	0.753471	1.05326	1.13009	0.559055	0.763484	0.740239	1.22336	0.865281	1.20032	2.10547	1.39881	1.48336
	-115.56	-487.477	-1954.46	-38.7573					189.278	0.542141	0.904279	0.896102	0.738375	0.678286	0.611852	1.13975	1.37967	0.781788	0.999016	1.16933	1.0573	0.947824	1.2308	0.780354	0.686509	1.04433	1.28485	1.17941	0.896167	1.27479	1.06611	0.594677	0.52727	0.746495	0.793286	0.92999	0.971303	0.755813	1.04983	1.12727	0.557724	0.766603	0.743927	1.21678	0.869603	1.19147	2.10102	1.39257	1.4888
	-115.44	-483.05	-1935.54	-36.3159					191.062	0.543381	0.902999	0.894253	0.735177	0.679419	0.609966	1.13531	1.38018	0.782296	0.996971	1.16494	1.05979	0.953577	1.23296	0.778622	0.685512	1.04095	1.27925	1.18405	0.897121	1.27234	1.06772	0.596866	0.527573	0.744883	0.789672	0.928232	0.966785	0.752366	1.04134	1.11482	0.557005	0.759761	0.740655	1.21384	0.868701	1.19157	2.11036	1.39316	1.48344
	-115.32	-477.096	-1931.57	-33.8745					192.847	0.541543	0.90229	0.89448	0.73451	0.677248	0.609206	1.13041	1.37772	0.77925	0.985388	1.15723	1.0547	0.950551	1.22638	0.77714	0.686567	1.03995	1.27992	1.18381	0.893767	1.28513	1.06691	0.593468	0.526581	0.737211	0.787069	0.926759	0.962761	0.75148	1.03777	1.1118	0.555853	0.758269	0.738308	1.20372	0.868886	1.18634	2.11454	1.38963	1.47961
	-115.2	-473.279	-1932.18	-36.3159					194.632	0.539995	0.899334	0.888462	0.731093	0.676407	0.609026	1.11996	1.37726	0.780219	0.99429	1.16115	1.05476	0.944263	1.22533	0.773274	0.683501	1.03665	1.27868	1.1763	0.88844	1.30874	1.07292	0.592793	0.528289	0.736139	0.784284	0.925833	0.967827	0.75093	1.03214	1.10595	0.554584	0.760683	0.735293	1.20038	0.870496	1.18193	2.10615	1.38875	1.47628
	-115.08	-484.415	-1918.75	-36.6211					196.419	0.539572	0.898441	0.890283	0.728853	0.675778	0.607253	1.11658	1.373	0.779871	0.985255	1.15686	1.05197	0.94132	1.22561	0.773043	0.684728	1.03395	1.27696	1.17449	0.888938	1.3153	1.06853	0.596456	0.525749	0.732467	0.7813	0.923423	0.969983	0.748564	1.03218	1.10204	0.554728	0.758689	0.728889	1.20061	0.862911	1.17243	2.08596	1.38566	1.48613
	-114.96	-491.584	-1916.31	-36.3159					198.204	0.537566	0.894928	0.887578	0.72615	0.677012	0.605035	1.10624	1.36425	0.778374	0.981804	1.14972	1.04973	0.934737	1.22846	0.772527	0.683683	1.02627	1.26801	1.17438	0.885031	1.31393	1.06862	0.594496	0.526701	0.727691	0.779593	0.923195	0.964725	0.743681	1.02782	1.10036	0.552556	0.753026	0.724409	1.19417	0.862022	1.17236	2.10385	1.38162	1.48028
	-114.84	-485.326	-1917.23	-32.959					199.989	0.536587	0.892103	0.887005	0.726554	0.675448	0.605361	1.10115	1.36276	0.774081	0.973984	1.14537	1.04986	0.940349	1.22082	0.769465	0.682802	1.02982	1.26972	1.18274	0.886604	1.31306	1.06882	0.594039	0.524595	0.72426	0.77558	0.923077	0.970744	0.745284	1.02396	1.0941	0.552711	0.753103	0.721933	1.19213	0.857542	1.18101	2.10752	1.38133	1.49034
	-114.72	-470.827	-1916.01	-36.6211					201.774	0.535674	0.889125	0.890596	0.724228	0.675454	0.604186	1.09913	1.36506	0.772509	0.976162	1.14646	1.04929	0.934588	1.2193	0.769053	0.681922	1.02828	1.26958	1.17713	0.882969	1.29786	1.06614	0.595349	0.524755	0.720382	0.774241	0.921777	0.970307	0.743431	1.0218	1.09916	0.552836	0.742707	0.718683	1.1937	0.857769	1.18626	2.10272	1.38095	1.49027
	-114.6	-462.432	-1913.87	-37.8418					203.559	0.535261	0.884991	0.887489	0.717922	0.675885	0.603498	1.094	1.36072	0.770746	0.97252	1.13391	1.04785	0.932421	1.2162	0.766984	0.683203	1.02179	1.26703	1.17961	0.884423	1.293	1.06813	0.592911	0.523276	0.716278	0.772179	0.918464	0.969518	0.740997	1.02068	1.1082	0.551033	0.739694	0.715781	1.19393	0.853809	1.18972	2.10581	1.38518	1.47919
	-114.48	-473.569	-1896.17	-37.2315					205.344	0.533845	0.885515	0.890253	0.715801	0.673742	0.604526	1.09207	1.36195	0.768966	0.968515	1.13474	1.04713	0.932565	1.21728	0.766079	0.685109	1.02309	1.26578	1.18553	0.883847	1.29282	1.06721	0.591063	0.524474	0.714225	0.771366	0.920112	0.974414	0.740258	1.0237	1.11344	0.551322	0.740974	0.715963	1.18972	0.857386	1.1949	2.09878	1.38569	1.48802
	-114.36	-467.005	-1891.9	-37.2315					207.129	0.532852	0.884812	0.889317	0.716751	0.672888	0.601446	1.08682	1.35778	0.768061	0.972936	1.1308	1.04565	0.931695	1.21907	0.763953	0.68589	1.02415	1.26385	1.18072	0.884269	1.30223	1.06798	0.590671	0.522187	0.712083	0.769668	0.919023	0.974145	0.738372	1.01901	1.12236	0.550783	0.739531	0.711201	1.18326	0.853603	1.19537	2.09822	1.37677	1.48909
	-114.24	-465.934	-1890.07	-37.5366					208.914	0.533438	0.880927	0.887957	0.712291	0.672724	0.602162	1.07839	1.35648	0.768182	0.972895	1.12721	1.04426	0.930849	1.21557	0.760512	0.684625	1.02189	1.26086	1.1818	0.885921	1.30154	1.07263	0.592746	0.52406	0.71556	0.769505	0.916596	0.972658	0.740745	1.01454	1.13348	0.54923	0.735422	0.708203	1.17785	0.850252	1.1934	2.10726	1.37778	1.48126
	-114.12	-474.629	-1899.83	-32.0435					210.699	0.532142	0.878248	0.885889	0.710232	0.669653	0.59997	1.07289	1.35223	0.765219	0.96177	1.12455	1.04115	0.925617	1.21562	0.757645	0.684029	1.02104	1.26192	1.17405	0.884109	1.29762	1.07435	0.588449	0.519518	0.711816	0.768535	0.913351	0.969901	0.733098	1.01462	1.13096	0.548641	0.735632	0.703869	1.17981	0.852389	1.18532	2.10297	1.37028	1.48272
	-114	-473.558	-1883.35	-39.3677					212.484	0.529669	0.877698	0.884658	0.70797	0.668925	0.600023	1.06513	1.34925	0.7669	0.966176	1.11598	1.04053	0.92586	1.23907	0.754567	0.683766	1.01711	1.2572	1.17029	0.879805	1.29717	1.0666	0.588491	0.52117	0.708422	0.764986	0.915419	0.970615	0.737986	1.01146	1.13205	0.549181	0.731292	0.700309	1.17366	0.850526	1.18446	2.09631	1.3673	1.48045
	-113.88	-481.643	-1869.62	-38.7573					214.268	0.530702	0.874916	0.882676	0.703386	0.668934	0.600452	1.06236	1.34271	0.765185	0.958174	1.11033	1.04562	0.921671	1.24663	0.754252	0.684313	1.01991	1.26491	1.1704	0.876431	1.28708	1.06291	0.58684	0.520657	0.706315	0.764718	0.91362	0.978236	0.734923	1.00844	1.15554	0.548385	0.733702	0.700325	1.17118	0.852132	1.17714	2.10156	1.36282	1.48005
	-113.76	-465.924	-1872.06	-40.2832					216.053	0.530606	0.872149	0.880292	0.704929	0.665473	0.599087	1.05918	1.33773	0.764097	0.957843	1.10876	1.04487	0.917362	1.24248	0.752691	0.684484	1.02027	1.26697	1.16838	0.872516	1.28414	1.06419	0.586535	0.522383	0.704733	0.762109	0.911996	0.980591	0.735871	1.0039	1.16341	0.549384	0.727682	0.697767	1.16795	0.845875	1.17308	2.0959	1.36343	1.47748
	-113.64	-457.224	-1863.51	-29.6021					217.838	0.527075	0.87112	0.87851	0.707415	0.66347	0.595065	1.04928	1.33418	0.762751	0.957883	1.112	1.04744	0.918706	1.24678	0.750997	0.684855	1.01388	1.27436	1.16927	0.870884	1.27381	1.06505	0.586771	0.520132	0.701983	0.759408	0.909002	0.983975	0.73464	0.998328	1.15288	0.548805	0.729996	0.694826	1.17032	0.845535	1.16585	2.09744	1.36251	1.4656
	-113.52	-457.984	-1862.6	-29.2969					219.623	0.528704	0.870664	0.878865	0.70568	0.667772	0.597955	1.04827	1.33203	0.76437	0.967235	1.11781	1.05298	0.916305	1.2362	0.749632	0.68403	1.01415	1.27735	1.16667	0.869162	1.28292	1.07234	0.586342	0.52115	0.705122	0.760083	0.910181	0.994128	0.73361	0.993871	1.14764	0.548565	0.737884	0.693688	1.16598	0.844526	1.16129	2.08213	1.36373	1.4635
	-113.4	-470.646	-1853.14	-29.9072					221.41	0.527129	0.867895	0.876773	0.704365	0.665618	0.59643	1.04795	1.32961	0.764513	0.96629	1.12888	1.05134	0.912915	1.22996	0.747669	0.684788	1.01437	1.28543	1.16269	0.867541	1.279	1.0793	0.586761	0.518968	0.7066	0.763688	0.9082	1.00921	0.734888	0.991445	1.13639	0.548171	0.739369	0.68934	1.16252	0.841175	1.15502	2.09203	1.36071	1.46877
	-113.28	-453.401	-1864.43	-41.5039					223.197	0.526303	0.868659	0.873112	0.704578	0.665999	0.593649	1.04348	1.32237	0.765418	0.969025	1.13848	1.04928	0.908698	1.22976	0.745704	0.683698	1.00969	1.28253	1.16038	0.864861	1.28111	1.07568	0.585792	0.520022	0.70455	0.758624	0.905002	1.00778	0.730421	0.985678	1.12052	0.547817	0.734059	0.688836	1.15837	0.837765	1.14814	2.08253	1.35578	1.46264
	-113.16	-439.818	-1844.9	-36.9263					224.981	0.526967	0.871112	0.872786	0.703974	0.666182	0.595923	1.04853	1.32564	0.767892	0.972151	1.14978	1.0512	0.902776	1.23064	0.744491	0.684101	1.01078	1.28681	1.16391	0.866637	1.28189	1.0732	0.583302	0.518777	0.701832	0.762404	0.905419	1.01345	0.73044	0.985373	1.11219	0.547377	0.735337	0.686624	1.15932	0.837716	1.14851	2.09001	1.35857	1.46082
	-113.04	-456.143	-1857.72	-33.5693					226.766	0.527442	0.871105	0.871877	0.701198	0.665099	0.593436	1.055	1.3265	0.768742	0.97227	1.15844	1.04969	0.903649	1.2357	0.744391	0.685256	1.0085	1.28354	1.16308	0.868264	1.28409	1.08095	0.585823	0.519336	0.70139	0.759002	0.905474	1.0102	0.728846	0.982788	1.10793	0.547786	0.733285	0.684487	1.1621	0.836085	1.14804	2.09309	1.35127	1.46571
	-112.92	-458.124	-1844.59	-43.0298					228.55	0.526449	0.872889	0.86976	0.699971	0.664287	0.593354	1.05675	1.32111	0.769873	0.967997	1.15407	1.04894	0.899065	1.2408	0.740951	0.683265	1.00756	1.2772	1.16138	0.865415	1.28601	1.07466	0.582656	0.519238	0.698104	0.757224	0.904158	1.01378	0.725587	0.980331	1.10327	0.547103	0.732704	0.681331	1.16312	0.83856	1.14054	2.09686	1.3568	1.46237
	-112.8	-457.053	-1833.91	-36.6211					230.335	0.525611	0.872444	0.866175	0.701774	0.664727	0.590248	1.05505	1.31711	0.769459	0.966604	1.15871	1.04751	0.898372	1.24861	0.743047	0.684666	1.00897	1.26881	1.1567	0.8714	1.2889	1.07571	0.583251	0.519545	0.6986	0.75691	0.904018	1.01017	0.725594	0.97366	1.09214	0.546592	0.744111	0.679331	1.16152	0.832204	1.14181	2.09309	1.35315	1.4667
	-112.68	-460.865	-1837.57	-30.2124					232.121	0.525374	0.87129	0.865752	0.704354	0.66306	0.592063	1.04847	1.31208	0.768737	0.967376	1.15652	1.04889	0.900523	1.24296	0.747355	0.684572	1.01164	1.27062	1.15488	0.870772	1.27939	1.07245	0.581632	0.518853	0.692765	0.755822	0.90079	1.00777	0.72361	0.97191	1.08329	0.545995	0.737208	0.67939	1.15504	0.831784	1.14184	2.09772	1.35541	1.46432
	-112.56	-463.151	-1811.94	-34.4849					233.904	0.52475	0.87035	0.861317	0.699591	0.663334	0.589985	1.04893	1.31137	0.766806	0.973523	1.14888	1.04539	0.891986	1.24839	0.746375	0.683343	1.00793	1.26883	1.15314	0.873553	1.27661	1.0781	0.579959	0.516391	0.690306	0.754065	0.898204	1.00609	0.722056	0.970557	1.07764	0.545601	0.730697	0.679167	1.15974	0.833719	1.14239	2.10649	1.34789	1.45885
	-112.44	-466.048	-1812.25	-32.0435					235.689	0.525739	0.86772	0.859868	0.701241	0.660829	0.588013	1.04762	1.30923	0.764499	0.975119	1.14649	1.04519	0.894838	1.24394	0.746237	0.683294	1.0075	1.26816	1.14876	0.873844	1.27136	1.07654	0.580838	0.518529	0.690145	0.754831	0.8977	1.00367	0.719206	0.96785	1.07221	0.545308	0.724827	0.682053	1.15439	0.832882	1.14917	2.09149	1.34791	1.45758
	-112.32	-455.212	-1805.53	-33.2642					237.474	0.523096	0.864406	0.857944	0.7008	0.661429	0.588298	1.04668	1.30385	0.763533	0.974495	1.15142	1.0421	0.891864	1.24348	0.743814	0.682035	1.00615	1.26389	1.14735	0.869957	1.2717	1.07855	0.579539	0.516604	0.688429	0.748918	0.895863	1.00025	0.717063	0.964013	1.06395	0.545081	0.717303	0.681798	1.16031	0.834506	1.16885	2.10884	1.34925	1.45274
	-112.2	-448.953	-1810.11	-34.1797					239.259	0.523563	0.862165	0.856343	0.699766	0.660713	0.589465	1.0377	1.29657	0.762797	0.974932	1.1512	1.04413	0.892976	1.25206	0.741522	0.682021	1.00268	1.26279	1.14437	0.867388	1.27306	1.077	0.575486	0.516531	0.685551	0.749049	0.893078	0.994915	0.715865	0.959904	1.0609	0.545074	0.716029	0.684464	1.1576	0.829705	1.17658	2.07588	1.35098	1.4572
	-112.08	-449.713	-1815.6	-35.4004					241.043	0.523932	0.860372	0.854927	0.700543	0.663409	0.58792	1.03777	1.29677	0.758343	0.970426	1.1527	1.04764	0.888485	1.26098	0.74395	0.681377	1.00019	1.25597	1.13973	0.866029	1.29456	1.08492	0.57731	0.517169	0.685196	0.746356	0.89645	0.99317	0.710257	0.95716	1.04971	0.544679	0.709126	0.682316	1.16038	0.827994	1.1788	2.0917	1.34902	1.45205
	-111.96	-455.967	-1798.82	-36.9263					242.827	0.523745	0.857458	0.854256	0.695694	0.660339	0.587418	1.03558	1.29778	0.758415	0.967047	1.15219	1.04427	0.882038	1.25399	0.740733	0.67891	0.99685	1.25635	1.14134	0.863146	1.3243	1.08662	0.575302	0.516896	0.682463	0.74512	0.890932	0.984958	0.708656	0.949618	1.04217	0.545067	0.705117	0.67878	1.15474	0.826017	1.16888	2.09695	1.34214	1.45506
	-111.84	-448.487	-1800.04	-33.8745					244.612	0.523511	0.856069	0.853618	0.696326	0.659545	0.585542	1.04109	1.29882	0.753839	0.966932	1.15154	1.04551	0.877757	1.25252	0.736654	0.676895	0.996069	1.25373	1.13416	0.86537	1.32543	1.08889	0.577253	0.517334	0.678567	0.741927	0.888656	0.978046	0.705907	0.950395	1.0383	0.543694	0.703194	0.676881	1.15037	0.821671	1.16555	2.08988	1.34465	1.45203
	-111.72	-448.943	-1798.51	-29.6021					246.398	0.523768	0.854357	0.85336	0.696836	0.658758	0.58552	1.0378	1.2964	0.752435	0.962361	1.14666	1.04939	0.879485	1.26823	0.73754	0.674985	0.998099	1.24995	1.12967	0.864007	1.3111	1.08922	0.575249	0.516675	0.680638	0.741303	0.884656	0.980967	0.705083	0.953517	1.03474	0.543954	0.700566	0.676201	1.14811	0.822435	1.16241	2.08255	1.33937	1.44261
	-111.6	-444.82	-1786.31	-33.2642					248.183	0.522893	0.854779	0.852725	0.69527	0.658453	0.584741	1.03387	1.29566	0.754872	0.958705	1.14376	1.0542	0.877678	1.2702	0.736737	0.672484	0.995149	1.25275	1.12883	0.862395	1.30889	1.09376	0.575848	0.516197	0.681449	0.743066	0.886819	0.977289	0.7055	0.948639	1.05311	0.544018	0.697396	0.673949	1.14612	0.824395	1.15733	2.08206	1.33955	1.44352
	-111.48	-437.035	-1766.77	-29.6021					249.97	0.523272	0.851094	0.850342	0.69499	0.660109	0.584994	1.03241	1.29286	0.755173	0.960402	1.14057	1.05459	0.876679	1.26869	0.735609	0.675092	0.994563	1.24608	1.13223	0.860635	1.29281	1.09543	0.575029	0.515428	0.681031	0.738848	0.883206	0.976898	0.705277	0.950208	1.07768	0.543815	0.696781	0.670744	1.14498	0.819254	1.14983	2.09639	1.33933	1.44174
	-111.36	-439.627	-1770.44	-27.771					251.754	0.522339	0.849838	0.853231	0.696711	0.658622	0.584456	1.02666	1.28808	0.749802	0.957407	1.13698	1.05457	0.87331	1.26736	0.734685	0.672948	0.990341	1.23989	1.12586	0.860734	1.28476	1.09318	0.573193	0.516907	0.681119	0.736405	0.878486	0.970271	0.702545	0.958396	1.10531	0.542976	0.692217	0.667955	1.14671	0.821731	1.14703	2.08284	1.33678	1.43007
	-111.24	-444.049	-1765.55	-29.2969					253.541	0.521603	0.848011	0.852885	0.695787	0.660439	0.585071	1.01833	1.28321	0.748679	0.953376	1.12966	1.05292	0.877344	1.26479	0.735801	0.674146	0.989213	1.23269	1.12664	0.865818	1.28581	1.09578	0.574456	0.51656	0.684784	0.738359	0.87824	0.971357	0.69932	0.979995	1.12325	0.543763	0.687131	0.670633	1.14886	0.82414	1.13975	2.08644	1.33416	1.4358
	-111.12	-444.505	-1768.61	-35.7056					255.326	0.520973	0.846961	0.850502	0.696867	0.659316	0.585395	1.02077	1.27726	0.747925	0.948882	1.12116	1.05775	0.875056	1.25925	0.734688	0.673446	0.98817	1.23001	1.12413	0.868431	1.2786	1.09805	0.576421	0.514613	0.685812	0.737478	0.874824	0.967753	0.700694	0.996367	1.13115	0.544202	0.6895	0.666725	1.14385	0.822413	1.14138	2.07655	1.33299	1.43274
	-111	-431.227	-1756.09	-31.1279					257.111	0.521972	0.844143	0.84888	0.695694	0.658988	0.583063	1.01761	1.27317	0.74477	0.945216	1.10771	1.05456	0.873794	1.2552	0.734148	0.673176	0.982446	1.22606	1.11496	0.865909	1.28326	1.09383	0.574631	0.515738	0.684112	0.735815	0.875735	0.965256	0.698206	1.00877	1.13761	0.544752	0.690545	0.665343	1.14452	0.824504	1.14288	2.08527	1.32842	1.43855
	-110.88	-438.396	-1752.74	-32.6538					258.896	0.520666	0.842442	0.850257	0.694762	0.656731	0.583714	1.01578	1.26928	0.74197	0.941479	1.10536	1.05231	0.867653	1.26111	0.73176	0.670446	0.98089	1.22852	1.11558	0.868675	1.28211	1.09071	0.574873	0.514307	0.682972	0.735831	0.872103	0.966084	0.695509	1.01869	1.14163	0.543527	0.689036	0.666217	1.14629	0.819847	1.1413	2.08654	1.32913	1.43325
	-110.76	-437.325	-1760.06	-29.6021					260.681	0.522361	0.843016	0.847978	0.69872	0.655223	0.584173	1.01116	1.26689	0.741789	0.937232	1.09754	1.05402	0.866682	1.25412	0.731376	0.671075	0.980142	1.23464	1.11737	0.869537	1.27501	1.08979	0.574515	0.515382	0.68354	0.732675	0.875003	0.95901	0.697427	1.02225	1.14722	0.543437	0.688194	0.666759	1.14412	0.81902	1.13616	2.06687	1.32104	1.42847
	-110.64	-423.437	-1749.38	-25.3296					262.466	0.521162	0.840035	0.846825	0.701747	0.655838	0.584928	1.01001	1.26302	0.745546	0.931649	1.08574	1.05399	0.863986	1.24745	0.72841	0.670394	0.978695	1.23408	1.11423	0.867913	1.26714	1.08825	0.572828	0.516335	0.680937	0.733548	0.881139	0.962745	0.691339	1.03028	1.13389	0.543653	0.687067	0.663456	1.13643	0.819242	1.13388	2.07855	1.32427	1.42745
	-110.52	-424.197	-1742.36	-29.9072					264.25	0.521637	0.836195	0.846093	0.702965	0.655795	0.584047	1.00544	1.25635	0.738291	0.937329	1.0782	1.05183	0.86254	1.2531	0.726645	0.668531	0.97377	1.23485	1.11272	0.870031	1.26466	1.08462	0.574037	0.516621	0.679422	0.730439	0.881737	0.962735	0.690118	1.03572	1.12764	0.542994	0.680719	0.660148	1.13769	0.816969	1.13578	2.07881	1.324	1.43553
	-110.4	-426.484	-1737.78	-31.7383					266.035	0.520993	0.834215	0.846911	0.70867	0.654558	0.583078	1.00393	1.25825	0.740206	0.934446	1.0753	1.04935	0.860307	1.24852	0.724765	0.668776	0.973435	1.2301	1.11281	0.868253	1.25964	1.07668	0.572345	0.514692	0.677426	0.730192	0.881534	0.978382	0.694856	1.04064	1.11854	0.542285	0.684523	0.661075	1.13398	0.81372	1.1453	2.0648	1.3371	1.43303
	-110.28	-426.939	-1735.95	-30.5176					267.819	0.520147	0.834295	0.845705	0.709713	0.654567	0.580604	1.00328	1.25766	0.737938	0.925205	1.06764	1.04968	0.859562	1.25335	0.7261	0.667218	0.968466	1.22839	1.11102	0.867392	1.25939	1.08249	0.573725	0.514223	0.67379	0.727146	0.880316	0.979898	0.693304	1.04032	1.11494	0.541983	0.683389	0.659208	1.12819	0.818587	1.15232	2.07572	1.34321	1.42278
	-110.16	-430.751	-1727.71	-37.5366					269.605	0.518871	0.830557	0.841613	0.707942	0.652104	0.578296	1.00107	1.2533	0.734118	0.926331	1.06233	1.04785	0.855557	1.24802	0.725024	0.665476	0.9688	1.22244	1.10522	0.865969	1.2561	1.08216	0.571441	0.513642	0.672398	0.726828	0.87731	0.979976	0.690553	1.04069	1.11088	0.54209	0.677512	0.65708	1.12623	0.812503	1.15033	2.07553	1.35903	1.42691
	-110.04	-425.103	-1724.66	-33.5693					271.39	0.519686	0.829121	0.843228	0.706477	0.652415	0.578905	1.00665	1.25341	0.734235	0.921088	1.05466	1.04824	0.851221	1.24972	0.7264	0.666542	0.969143	1.21829	1.10219	0.863396	1.25366	1.0854	0.573051	0.514349	0.672636	0.727582	0.877417	0.980749	0.694336	1.04486	1.10275	0.541838	0.679837	0.655132	1.12591	0.812423	1.15481	2.08501	1.36623	1.42302
	-109.92	-421.896	-1722.22	-32.959					273.175	0.519988	0.826304	0.842262	0.709473	0.651517	0.579389	1.00149	1.25283	0.735276	0.921941	1.04833	1.04573	0.853007	1.2559	0.727165	0.668991	0.973274	1.22342	1.102	0.861604	1.26389	1.08024	0.573798	0.514822	0.673103	0.728006	0.874129	0.975817	0.692888	1.04415	1.09301	0.542169	0.678837	0.653765	1.12513	0.811863	1.15171	2.07225	1.36596	1.42664
	-109.8	-417.163	-1712.76	-32.0435					274.962	0.518949	0.824557	0.846229	0.703876	0.652544	0.575792	1.00148	1.24867	0.734762	0.915726	1.04452	1.04398	0.850486	1.27776	0.729257	0.6693	0.973561	1.21897	1.09297	0.861834	1.2618	1.08503	0.573628	0.515242	0.671926	0.723577	0.872182	0.969094	0.688428	1.04726	1.09393	0.541719	0.674341	0.652079	1.12304	0.812065	1.14954	2.0774	1.37033	1.42997
	-109.68	-428.299	-1711.84	-27.1606					276.747	0.519042	0.822614	0.844306	0.704376	0.651459	0.57601	0.999777	1.24992	0.734715	0.916396	1.03737	1.04045	0.847057	1.2849	0.731386	0.666995	0.974209	1.21734	1.09776	0.860237	1.25776	1.08399	0.572188	0.512995	0.670758	0.72124	0.872547	0.97261	0.685897	1.04842	1.08801	0.542111	0.674967	0.65176	1.12019	0.81077	1.14962	2.07219	1.37125	1.42594
	-109.56	-415.632	-1704.52	-33.8745					278.533	0.519888	0.822135	0.846383	0.701725	0.650377	0.573571	0.994761	1.25013	0.738069	0.915214	1.03189	1.03971	0.846145	1.28951	0.73379	0.668625	0.976979	1.22153	1.09361	0.860896	1.25553	1.09027	0.572038	0.514668	0.667949	0.723777	0.872215	0.96472	0.685043	1.06453	1.08796	0.541826	0.676498	0.647983	1.12104	0.811569	1.15125	2.06749	1.36829	1.42564
	-109.44	-417.613	-1709.71	-30.2124					280.32	0.519094	0.82164	0.842842	0.700971	0.649363	0.57414	0.998656	1.24686	0.740401	0.90833	1.02755	1.04626	0.843453	1.29634	0.729703	0.667389	0.982824	1.2279	1.09292	0.861294	1.25825	1.09195	0.571534	0.51455	0.664839	0.721214	0.869174	0.96326	0.681928	1.07896	1.08598	0.541759	0.679553	0.646042	1.11832	0.812094	1.14842	2.0586	1.36758	1.42713
	-109.32	-411.049	-1684.07	-25.0244					282.105	0.519405	0.822466	0.842972	0.700092	0.649942	0.573608	1.00088	1.24385	0.740911	0.912597	1.0206	1.04503	0.844622	1.29735	0.729022	0.666623	0.982453	1.22645	1.10983	0.860678	1.24628	1.09277	0.569515	0.5141	0.66661	0.72521	0.867815	0.961865	0.683922	1.08019	1.07893	0.540773	0.678587	0.645536	1.11595	0.812895	1.14515	2.07362	1.36805	1.42862
	-109.2	-424.932	-1689.87	-31.1279					283.892	0.518243	0.818364	0.841193	0.699049	0.649438	0.57301	1.00365	1.24299	0.742093	0.912261	1.01832	1.0411	0.842032	1.29853	0.730124	0.665188	0.981684	1.22578	1.10991	0.860219	1.25912	1.09102	0.568429	0.513214	0.664075	0.727908	0.864044	0.959059	0.677092	1.08777	1.07403	0.540575	0.68322	0.645415	1.1125	0.817634	1.14136	2.06995	1.36581	1.4254
	-109.08	-418.673	-1683.77	-33.2642					285.677	0.51929	0.820359	0.836974	0.697873	0.649868	0.572753	1.00542	1.24017	0.74045	0.905124	1.01537	1.04265	0.843641	1.31102	0.726422	0.666071	0.979815	1.21999	1.1032	0.856617	1.2529	1.09539	0.569211	0.513818	0.664058	0.729054	0.862892	0.950863	0.678886	1.08904	1.07526	0.540986	0.693555	0.643957	1.11285	0.814047	1.13642	2.06871	1.35816	1.42646
	-108.96	-411.194	-1686.21	-29.9072					287.462	0.519134	0.820247	0.837074	0.695881	0.64833	0.571571	1.01564	1.24375	0.739379	0.906029	1.01671	1.03926	0.845492	1.31885	0.726356	0.663919	0.987691	1.21951	1.1043	0.854755	1.24995	1.09254	0.570082	0.512954	0.662529	0.730128	0.861858	0.947591	0.680688	1.09335	1.07501	0.540499	0.706389	0.642187	1.11288	0.815087	1.13723	2.05978	1.35735	1.42132
	-108.84	-418.973	-1680.41	-29.9072					289.247	0.518432	0.818142	0.834665	0.693324	0.649317	0.57019	1.01416	1.24072	0.737616	0.901547	1.00571	1.03935	0.842875	1.31342	0.725209	0.664417	0.986315	1.21801	1.09776	0.852941	1.24256	1.09991	0.568951	0.513619	0.666029	0.732946	0.86075	0.946823	0.679883	1.0943	1.06731	0.540358	0.718789	0.645499	1.11181	0.817727	1.13178	2.06644	1.35176	1.41892
	-108.72	-419.428	-1673.7	-26.8555					291.033	0.51923	0.818601	0.833977	0.692235	0.649675	0.569987	1.0132	1.23996	0.734374	0.900351	1.00225	1.03856	0.846204	1.30506	0.724748	0.660649	0.982512	1.21409	1.10231	0.855529	1.2458	1.09591	0.568521	0.512532	0.666178	0.730031	0.854931	0.942545	0.678243	1.09316	1.0681	0.540005	0.730752	0.644898	1.11483	0.817815	1.13045	2.06716	1.34805	1.42281
	-108.6	-400.352	-1666.07	-36.3159					292.817	0.517724	0.812658	0.835076	0.693166	0.646941	0.569207	1.01099	1.23199	0.731802	0.895289	1.00071	1.03731	0.8452	1.30407	0.720905	0.661713	0.979887	1.22229	1.10484	0.854611	1.24924	1.10072	0.567269	0.51412	0.664349	0.729425	0.852866	0.948063	0.677073	1.09482	1.06715	0.539763	0.736819	0.646818	1.11637	0.820576	1.13118	2.05016	1.34518	1.42759
	-108.48	-411.489	-1660.27	-33.8745					294.601	0.518653	0.814327	0.834389	0.689948	0.646484	0.569991	1.00472	1.2343	0.731743	0.895513	0.99368	1.03845	0.847774	1.30704	0.724135	0.6606	0.979724	1.23957	1.1053	0.856325	1.25008	1.10658	0.567708	0.513868	0.66635	0.730183	0.851484	0.945275	0.673238	1.08806	1.06559	0.539754	0.733293	0.650089	1.11536	0.819619	1.12973	2.05714	1.34026	1.42568
	-108.36	-413.775	-1654.77	-30.2124					296.386	0.516954	0.812495	0.833995	0.689408	0.648491	0.5708	1.00791	1.23455	0.732916	0.892814	0.993182	1.03265	0.849891	1.30739	0.722308	0.660267	0.978326	1.24945	1.09834	0.853526	1.25269	1.10641	0.567718	0.512831	0.665461	0.725214	0.851097	0.944508	0.670175	1.09147	1.06008	0.539701	0.730906	0.649757	1.11817	0.821015	1.12733	2.05685	1.33699	1.42004
	-108.24	-397.751	-1659.05	-31.4331					298.171	0.518253	0.814229	0.833585	0.688059	0.64831	0.571756	1.01596	1.24126	0.73398	0.892963	0.987231	1.03465	0.848588	1.29897	0.71916	0.658962	0.977048	1.24782	1.10171	0.85159	1.25266	1.11032	0.565987	0.51329	0.663105	0.722125	0.847158	0.941975	0.674623	1.09322	1.06274	0.540264	0.728161	0.648824	1.11198	0.821152	1.12849	2.05762	1.33866	1.42842
	-108.12	-404.92	-1654.16	-28.3814					299.955	0.516781	0.811678	0.830601	0.683992	0.648279	0.571205	1.01396	1.24542	0.735036	0.8923	0.985873	1.03173	0.849349	1.29976	0.716691	0.660231	0.980293	1.24262	1.09675	0.850071	1.24872	1.11311	0.565551	0.511017	0.665214	0.729716	0.843675	0.947373	0.671556	1.09136	1.05778	0.53903	0.722235	0.651532	1.1158	0.819359	1.12575	2.03937	1.33418	1.41711
	-108	-412.394	-1642.87	-29.9072					301.74	0.51631	0.811788	0.831131	0.684743	0.648152	0.572019	1.01397	1.25315	0.73703	0.895607	0.97095	1.03205	0.84628	1.30472	0.717318	0.657493	0.975765	1.24221	1.0893	0.850136	1.25677	1.11248	0.566106	0.512426	0.663968	0.736979	0.840678	0.950044	0.669623	1.08928	1.05594	0.539569	0.712752	0.648118	1.10967	0.815071	1.12903	2.04913	1.3308	1.41436
	-107.88	-405.22	-1645.62	-27.771					303.525	0.517236	0.809033	0.829966	0.680643	0.642794	0.571467	1.00522	1.24708	0.73679	0.889334	0.974864	1.03222	0.846571	1.30118	0.71308	0.657778	0.975892	1.23361	1.08452	0.84437	1.25943	1.11061	0.566821	0.512412	0.661783	0.739065	0.837049	0.950781	0.669207	1.08697	1.056	0.539552	0.711117	0.644684	1.11327	0.816495	1.13455	2.04976	1.32973	1.41536
	-107.76	-411.778	-1637.99	-24.4141					305.31	0.514575	0.811514	0.832477	0.685007	0.648135	0.571707	1.06292	1.26519	0.737973	0.887584	0.966873	1.03141	0.848791	1.30313	0.716605	0.656977	0.973963	1.23294	1.09137	0.845638	1.25938	1.11594	0.566193	0.511516	0.663227	0.745744	0.834957	0.95354	0.667681	1.08214	1.05411	0.539386	0.707875	0.648029	1.11087	0.813479	1.14188	2.0694	1.33822	1.41595
	-107.64	-407.351	-1627	-25.0244					307.097	0.516414	0.805737	0.829409	0.68162	0.646479	0.571798	1.09177	1.26818	0.734989	0.885877	0.966189	1.03179	0.844163	1.31777	0.714698	0.656579	0.971219	1.22178	1.0765	0.839425	1.24602	1.11663	0.567065	0.512124	0.660768	0.739783	0.825357	0.955925	0.669504	1.08502	1.0496	0.541012	0.706141	0.648223	1.11248	0.811756	1.13799	2.08251	1.33027	1.42345
	-107.52	-391.326	-1624.26	-26.8555					308.884	0.531117	0.997219	0.944836	0.742073	0.688351	0.611721	1.46748	1.63691	0.797876	1.0818	1.39102	1.20442	0.992845	1.40976	0.803579	0.67783	1.04594	1.39744	1.29873	0.906959	1.47257	1.14012	0.685778	0.525646	0.889912	0.900665	0.918363	1.13711	0.883759	1.4435	1.50629	0.590327	0.771554	0.711821	1.34713	1.01021	1.27373	2.12098	1.44146	1.47274
	-107.4	-390.256	-1621.51	-32.959					310.671	0.540835	1.14857	1.0372	0.7844	0.710208	0.630959	1.63839	1.79507	0.83721	1.19238	1.67277	1.29454	1.19916	1.53001	0.868761	0.707195	1.12562	1.55025	1.47412	0.965847	1.70774	1.16233	0.752255	0.530899	0.984129	0.975692	1.00131	1.2055	0.95117	1.61473	1.72469	0.644527	0.832007	0.756353	1.46351	1.08477	1.38782	2.13923	1.53408	1.49178
	-107.28	-396.814	-1611.74	-30.5176					312.458	0.546438	1.2088	1.08004	0.817288	0.720691	0.644031	1.71487	1.83835	0.854055	1.24027	1.75194	1.33031	1.29386	1.58127	0.888753	0.722059	1.1632	1.63523	1.53921	0.99634	1.76839	1.17234	0.778313	0.532647	1.01708	1.00702	1.04284	1.23382	0.979683	1.68118	1.80069	0.681852	0.866324	0.791298	1.52833	1.12233	1.4578	2.1585	1.58335	1.50686
	-107.16	-385.062	-1609.91	-29.6021					314.243	0.547651	1.23825	1.09972	0.827493	0.724281	0.648299	1.75437	1.8546	0.866671	1.26933	1.79492	1.35265	1.34106	1.60596	0.901813	0.728514	1.17877	1.68041	1.56522	1.01377	1.81809	1.17761	0.790398	0.535271	1.0289	1.02123	1.06393	1.24259	0.981854	1.71185	1.84864	0.712053	0.894397	0.80956	1.55635	1.1365	1.49939	2.18226	1.60783	1.52106
	-107.04	-388.264	-1606.25	-23.4985					316.028	0.549687	1.24978	1.11222	0.840083	0.729667	0.651852	1.76507	1.85332	0.867444	1.28649	1.793	1.35792	1.35874	1.61472	0.910224	0.735015	1.19099	1.71369	1.58419	1.02208	1.81854	1.18457	0.794355	0.538145	1.03253	1.02535	1.08023	1.23677	0.97975	1.71612	1.86955	0.733807	0.910799	0.823797	1.56604	1.13149	1.53298	2.16992	1.63253	1.52709
	-106.92	-387.194	-1606.86	-28.6865					317.813	0.551326	1.25772	1.12064	0.848041	0.73291	0.657192	1.78646	1.85208	0.872903	1.29509	1.7886	1.36813	1.37559	1.6258	0.909268	0.739917	1.20545	1.74372	1.59412	1.03074	1.83523	1.1842	0.802973	0.53928	1.0308	1.03802	1.09463	1.24108	0.976622	1.72172	1.89284	0.752141	0.917207	0.834306	1.58196	1.13672	1.552	2.18803	1.64429	1.52938
	-106.8	-398.635	-1602.59	-30.8228					319.599	0.551328	1.26423	1.12613	0.860685	0.732919	0.659709	1.79846	1.84445	0.873671	1.30264	1.78167	1.36744	1.39014	1.6324	0.914189	0.743508	1.21154	1.76513	1.60141	1.03724	1.82825	1.19321	0.805164	0.540365	1.03106	1.04195	1.10126	1.24079	0.974086	1.71836	1.89315	0.766919	0.935681	0.844504	1.57951	1.13821	1.57156	2.1835	1.65448	1.5199
	-106.68	-397.564	-1598.01	-30.8228					321.384	0.555436	1.262	1.13128	0.862769	0.734057	0.66343	1.79112	1.83928	0.876965	1.31086	1.77233	1.37235	1.40878	1.63463	0.915634	0.748526	1.2171	1.78015	1.60068	1.0414	1.83953	1.18985	0.809876	0.54249	1.03154	1.05242	1.11256	1.24035	0.968931	1.71816	1.8941	0.779671	0.938891	0.852978	1.58011	1.13901	1.58633	2.18299	1.65745	1.52519
	-106.56	-375.436	-1601.98	-20.752					323.171	0.556252	1.26259	1.13163	0.871276	0.738008	0.665829	1.79034	1.83622	0.876549	1.30838	1.76164	1.3727	1.41598	1.62951	0.91662	0.749349	1.21454	1.79455	1.60276	1.04659	1.84275	1.19735	0.80902	0.543376	1.0308	1.04787	1.1139	1.24032	0.969111	1.70602	1.90015	0.79039	0.950726	0.859433	1.59301	1.1377	1.59408	2.20488	1.67142	1.53001
	-106.44	-390.845	-1597.71	-34.79					324.957	0.554862	1.26713	1.13497	0.873467	0.742869	0.669057	1.78418	1.83322	0.875919	1.3191	1.75089	1.37446	1.42953	1.63733	0.91818	0.751812	1.21786	1.8075	1.59846	1.05192	1.84388	1.19165	0.814439	0.544238	1.0268	1.04864	1.12709	1.23479	0.969792	1.70002	1.89882	0.801751	0.952648	0.863387	1.59411	1.14344	1.61056	2.20576	1.67217	1.53203
	-106.32	-386.112	-1588.86	-24.1089					326.742	0.55621	1.26982	1.1355	0.882708	0.741288	0.674096	1.78716	1.82597	0.876571	1.32079	1.74028	1.37575	1.44777	1.64098	0.919099	0.756287	1.23226	1.81177	1.60117	1.05855	1.84813	1.19959	0.812489	0.544204	1.03248	1.05272	1.13024	1.23717	0.975799	1.69951	1.90578	0.808469	0.962479	0.867853	1.5922	1.14184	1.62096	2.19562	1.6785	1.5287
	-106.2	-384.431	-1580.31	-24.4141					328.529	0.558192	1.26712	1.13573	0.887702	0.743858	0.675609	1.78077	1.81828	0.877653	1.31356	1.72785	1.37605	1.45858	1.64004	0.919047	0.757259	1.22806	1.81692	1.59325	1.05754	1.85257	1.19155	0.813922	0.54703	1.02721	1.05177	1.13596	1.23131	0.971159	1.68752	1.8856	0.815384	0.965257	0.870002	1.59831	1.13157	1.62255	2.18959	1.67917	1.52686
	-106.08	-374.816	-1580.01	-35.7056					330.313	0.558108	1.27399	1.13746	0.892104	0.746887	0.676227	1.7781	1.81776	0.873304	1.31528	1.74123	1.37321	1.45821	1.63459	0.920092	0.759997	1.23148	1.81824	1.59268	1.0625	1.84699	1.19546	0.814154	0.545888	1.03224	1.04422	1.13707	1.23473	0.969427	1.69154	1.89082	0.818803	0.969154	0.873573	1.60149	1.1381	1.63114	2.20097	1.68162	1.52974
	-105.96	-379.849	-1582.45	-29.6021					332.097	0.560296	1.27818	1.13606	0.897831	0.747082	0.680016	1.77894	1.81416	0.879378	1.32084	1.72853	1.37734	1.46413	1.63527	0.919861	0.759462	1.23656	1.82435	1.602	1.06805	1.8535	1.19623	0.815445	0.546609	1.03281	1.05146	1.1403	1.23287	0.968133	1.68792	1.88676	0.823009	0.975751	0.876053	1.60155	1.13352	1.63573	2.20442	1.68273	1.53131
	-105.84	-382.135	-1569.33	-31.7383					333.881	0.559227	1.27643	1.13959	0.89844	0.746954	0.682293	1.77483	1.81053	0.875812	1.32027	1.71493	1.37457	1.46068	1.62987	0.920188	0.762564	1.23154	1.82835	1.59364	1.07079	1.84695	1.19309	0.811719	0.54676	1.02909	1.04532	1.14707	1.23281	0.967831	1.67131	1.86899	0.826575	0.983648	0.883393	1.59502	1.13696	1.63223	2.18791	1.67638	1.52397
	-105.72	-378.623	-1567.49	-31.7383					335.665	0.561175	1.28082	1.14205	0.905712	0.746061	0.682063	1.77455	1.80748	0.879309	1.32037	1.71254	1.37538	1.46005	1.63715	0.925496	0.76361	1.23736	1.82703	1.59835	1.07302	1.85351	1.19689	0.813289	0.548753	1.0317	1.04454	1.1503	1.23422	0.969736	1.66939	1.86522	0.833456	0.994895	0.887111	1.59621	1.13629	1.64088	2.19775	1.68283	1.52401
	-105.6	-372.364	-1549.49	-26.8555					337.45	0.562116	1.28219	1.14688	0.90958	0.750183	0.684427	1.76648	1.80158	0.878003	1.3153	1.70756	1.37231	1.46679	1.63136	0.920476	0.764772	1.23693	1.83323	1.6	1.075	1.85689	1.19549	0.814027	0.547893	1.03531	1.05042	1.16298	1.23245	0.964006	1.6745	1.86592	0.835324	1.00051	0.886264	1.6069	1.13474	1.63836	2.18732	1.67185	1.52301
	-105.48	-382.28	-1572.07	-33.8745					339.235	0.562192	1.28085	1.14977	0.916299	0.750644	0.684344	1.76976	1.80656	0.88079	1.32082	1.70914	1.38204	1.47382	1.63677	0.918953	0.766629	1.23491	1.82969	1.59508	1.076	1.87081	1.19519	0.812692	0.547555	1.03815	1.05187	1.16203	1.23209	0.972151	1.66927	1.86295	0.840444	1.00566	0.891678	1.60437	1.13256	1.64943	2.20672	1.67841	1.52131
	-105.36	-374.19	-1553.46	-30.5176					341.022	0.563267	1.28588	1.15112	0.919474	0.753883	0.687697	1.76955	1.80235	0.881042	1.31888	1.6944	1.37759	1.46871	1.63967	0.920136	0.767616	1.24396	1.83671	1.59374	1.08101	1.86228	1.18742	0.811522	0.548672	1.04169	1.05105	1.16836	1.22905	0.967045	1.66035	1.85463	0.845907	1.00801	0.887153	1.60164	1.13266	1.64919	2.18722	1.67494	1.5245
	-105.24	-377.392	-1553.76	-27.771					342.806	0.562978	1.28479	1.15158	0.924723	0.754107	0.68658	1.75657	1.79508	0.880854	1.32588	1.69293	1.36988	1.46513	1.6313	0.922042	0.76792	1.23795	1.83774	1.6016	1.07943	1.86813	1.19028	0.813241	0.548843	1.04547	1.05109	1.16895	1.22832	0.963077	1.66061	1.85227	0.849355	1.01273	0.888985	1.59405	1.12979	1.65111	2.20153	1.66807	1.52017
	-105.12	-376.016	-1540.64	-30.2124					344.592	0.565911	1.29322	1.15229	0.929459	0.754887	0.690294	1.75933	1.8	0.883	1.32208	1.69209	1.38335	1.47173	1.63137	0.923458	0.77124	1.24102	1.84373	1.6014	1.0876	1.8808	1.19607	0.80882	0.546912	1.04535	1.05785	1.18013	1.23059	0.967298	1.66399	1.85753	0.857136	1.01525	0.890356	1.5974	1.13418	1.65396	2.19522	1.66786	1.5354
	-105	-380.438	-1538.81	-26.8555					346.376	0.565359	1.28448	1.1538	0.932945	0.755223	0.689625	1.74871	1.79224	0.883199	1.32019	1.69017	1.37624	1.4644	1.62612	0.926076	0.773693	1.24214	1.8458	1.59377	1.09004	1.86803	1.19841	0.809754	0.549516	1.04926	1.05448	1.18271	1.22895	0.971435	1.65792	1.85785	0.857237	1.01937	0.889243	1.59157	1.13124	1.65287	2.17868	1.67456	1.53029
	-104.88	-361.362	-1530.26	-28.9917					348.16	0.566318	1.29035	1.16356	0.938817	0.759718	0.693659	1.75832	1.79242	0.881141	1.32686	1.68859	1.37744	1.46427	1.6303	0.925859	0.774933	1.25019	1.8506	1.59681	1.09387	1.86409	1.19669	0.808395	0.549465	1.04669	1.05842	1.18225	1.23073	0.974238	1.65255	1.84647	0.863707	1.02118	0.883779	1.59637	1.13204	1.66238	2.20193	1.67149	1.54445
	-104.76	-359.681	-1531.48	-23.8037					349.947	0.566123	1.28655	1.16229	0.942949	0.759344	0.692806	1.74992	1.79141	0.880513	1.32257	1.69608	1.3778	1.46543	1.62993	0.9259	0.774835	1.2442	1.85228	1.59446	1.09506	1.87223	1.19195	0.809975	0.551438	1.04903	1.05945	1.18772	1.22349	0.970822	1.65763	1.85225	0.865479	1.03436	0.885154	1.59259	1.13279	1.65883	2.18599	1.66768	1.54967
	-104.64	-357.085	-1528.74	-30.5176					351.73	0.56713	1.29052	1.16346	0.943925	0.759901	0.695434	1.75524	1.79189	0.883405	1.32185	1.70573	1.38264	1.46483	1.63348	0.92408	0.773766	1.24452	1.85928	1.59667	1.10183	1.87155	1.20294	0.807566	0.550162	1.05336	1.06367	1.19495	1.22992	0.968678	1.65433	1.85565	0.869797	1.02751	0.883168	1.58545	1.13595	1.66408	2.20008	1.66765	1.55784
	-104.52	-370.357	-1513.48	-29.9072					353.515	0.56992	1.2875	1.16624	0.946787	0.762061	0.696531	1.74836	1.78835	0.883871	1.3197	1.7035	1.377	1.46645	1.62887	0.926305	0.776144	1.24949	1.85958	1.5991	1.0999	1.87891	1.19891	0.80517	0.549246	1.05562	1.06316	1.1917	1.23091	0.964942	1.65701	1.84729	0.871422	1.03726	0.88589	1.58942	1.13273	1.66015	2.20409	1.66232	1.55557
	-104.4	-354.333	-1517.75	-29.9072					355.301	0.566775	1.28498	1.16572	0.951775	0.76344	0.696709	1.74192	1.78276	0.88166	1.32753	1.68956	1.37783	1.46188	1.63406	0.927405	0.776294	1.24957	1.86416	1.59066	1.10428	1.88716	1.19634	0.800313	0.550314	1.05042	1.06054	1.19231	1.21869	0.965323	1.653	1.84771	0.874694	1.03441	0.880023	1.58108	1.13958	1.66159	2.19212	1.66365	1.55457
	-104.28	-373.098	-1510.12	-28.0762					357.086	0.570211	1.28483	1.16867	0.953679	0.762102	0.698414	1.74554	1.78412	0.886703	1.32498	1.68067	1.383	1.46489	1.62836	0.932145	0.774443	1.24906	1.8704	1.59854	1.09922	1.88912	1.19638	0.802863	0.550181	1.05358	1.06005	1.19945	1.22618	0.963666	1.65263	1.85028	0.875577	1.04462	0.876022	1.58364	1.13722	1.66492	2.19327	1.66808	1.55433
	-104.16	-369.892	-1500.36	-30.2124					358.872	0.57055	1.28221	1.16833	0.95731	0.765653	0.699224	1.74751	1.78242	0.885038	1.32089	1.68723	1.38247	1.4554	1.63911	0.929807	0.778383	1.24769	1.86541	1.60156	1.09897	1.87059	1.19942	0.802165	0.550307	1.05462	1.06252	1.19375	1.23147	0.970305	1.6551	1.84046	0.879667	1.04402	0.877477	1.57159	1.13646	1.66856	2.17712	1.66766	1.55156
	-104.04	-362.107	-1517.14	-25.0244					360.658	0.571487	1.2878	1.17051	0.961304	0.767995	0.701567	1.7546	1.78551	0.884542	1.31862	1.69021	1.38895	1.46289	1.64157	0.934896	0.781706	1.25604	1.86787	1.60663	1.09982	1.87768	1.19755	0.801473	0.549671	1.06102	1.0639	1.2021	1.22991	0.96423	1.65645	1.83758	0.88485	1.05296	0.876894	1.56959	1.13988	1.66885	2.19876	1.67592	1.55184
	-103.92	-345.472	-1497.3	-35.0952					362.442	0.570073	1.28334	1.17219	0.963574	0.768045	0.702004	1.75006	1.7831	0.884187	1.33268	1.69057	1.38178	1.46388	1.63192	0.932657	0.779753	1.25151	1.87136	1.606	1.10143	1.8638	1.19677	0.804588	0.549337	1.05965	1.06092	1.20475	1.22998	0.967471	1.65145	1.83856	0.887664	1.04816	0.873138	1.56455	1.14061	1.67153	2.19074	1.67567	1.56206
	-103.8	-350.2	-1502.8	-28.9917					364.228	0.572466	1.28656	1.1755	0.969549	0.768878	0.703693	1.74718	1.78486	0.881736	1.32703	1.69113	1.39064	1.46532	1.63534	0.932291	0.782775	1.25392	1.87961	1.60413	1.10485	1.86662	1.19636	0.802933	0.550292	1.06532	1.06803	1.20724	1.22979	0.966743	1.65342	1.83978	0.888779	1.05316	0.872333	1.57043	1.13314	1.66904	2.19841	1.66625	1.5575
	-103.68	-358.895	-1490.9	-32.959					366.014	0.573164	1.28411	1.17317	0.970009	0.766791	0.704132	1.74973	1.78376	0.882383	1.32585	1.68734	1.38407	1.45414	1.63642	0.934425	0.77978	1.24982	1.86978	1.60269	1.10034	1.87417	1.19259	0.804538	0.55161	1.06528	1.06434	1.20627	1.2304	0.969895	1.64894	1.83846	0.885909	1.05301	0.868059	1.55514	1.13513	1.66762	2.18266	1.66881	1.55177
	-103.56	-361.181	-1488.15	-30.2124					367.797	0.57392	1.2841	1.17733	0.969651	0.769115	0.705048	1.75287	1.78319	0.880931	1.3268	1.69349	1.38774	1.45708	1.63167	0.937583	0.785571	1.25046	1.87971	1.60506	1.10349	1.8709	1.19757	0.805925	0.554939	1.06804	1.06154	1.20868	1.23173	0.967464	1.64895	1.83706	0.889041	1.05867	0.869977	1.55956	1.13807	1.67203	2.19456	1.67983	1.54982
	-103.44	-344.852	-1479.6	-27.771					369.58
	-103.32	-341.95	-1471.36	-25.9399					371.364
	-103.2	-344.541	-1482.96	-27.1606					373.151
	-103.08	-334.315	-1474.11	-35.4004					374.937
	-102.96	-345.146	-1467.09	-30.2124					376.722
	-102.84	-349.874	-1470.14	-28.3814					378.507
	-102.72	-337.512	-1464.65	-30.5176					380.291
	-102.6	-337.662	-1452.44	-32.3486					382.076
	-102.48	-336.896	-1456.41	-30.5176					383.861
	-102.36	-337.352	-1446.03	-30.5176					385.646
	-102.24	-342.69	-1440.85	-28.6865					387.43
	-102.12	-354.131	-1442.07	-26.5503					389.217
	-102	-338.107	-1448.48	-26.8555					391.002
	-101.88	-340.698	-1440.24	-26.5503					392.787
	-101.76	-337.491	-1434.74	-25.3296					394.573
	-101.64	-344.05	-1424.37	-29.9072
	-101.52	-338.707	-1415.52	-31.1279
	-101.4	-329.396	-1420.09	-23.4985
	-101.28	-330.462	-1429.25	-24.4141
	-101.16	-342.208	-1416.74	-25.9399
	-101.04	-335.339	-1406.67	-27.4658
	-100.92	-329.386	-1399.34	-28.6865
	-100.8	-332.893	-1404.23	-25.6348
	-100.68	-324.193	-1394.76	-24.7192
	-100.56	-334.108	-1403.31	-28.0762
	-100.44	-335.174	-1390.8	-21.6675
	-100.32	-324.948	-1385.91	-26.5503
	-100.2	-330.591	-1380.42	-27.771
	-100.08	-324.332	-1381.34	-27.4658
	-99.96	-316.243	-1377.67	-24.1089
	-99.84	-309.068	-1375.84	-30.8228
	-99.72	-311.049	-1368.52	-27.4658
	-99.6	-306.011	-1367.6	-20.1416
	-99.48	-321.725	-1362.11	-21.6675
	-99.36	-318.824	-1356.01	-12.5122
	-99.24	-312.26	-1371.57	-26.5503
	-99.12	-307.222	-1357.23	-22.2778
	-99	-315.612	-1345.94	-29.6021
	-98.88	-314.236	-1345.63	-24.1089
	-98.76	-325.677	-1336.78	-21.6675
	-98.64	-317.282	-1337.39	-23.4985
	-98.52	-305.225	-1335.56	-18.3106
	-98.4	-300.492	-1336.48	-27.4658
	-98.28	-289.351	-1318.17	-19.5313
	-98.16	-305.98	-1326.41	-28.6865
	-98.04	-300.332	-1321.52	-27.1606
	-97.92	-292.853	-1310.23	-23.1934
	-97.8	-290.866	-1307.18	-21.0571
	-97.68	-288.575	-1304.74	-20.752
	-97.56	-295.439	-1298.63	-23.1934
	-97.44	-295.589	-1301.99	-20.4468
	-97.32	-296.654	-1294.36	-22.2778
	-97.2	-285.208	-1288.56	-17.7002
	-97.08	-283.832	-1290.7	-28.3814
	-96.96	-287.644	-1287.95	-22.8882
	-96.84	-300.306	-1278.49	-25.6348
	-96.72	-297.099	-1280.93	-22.2778
	-96.6	-293.282	-1268.42	-28.9917
	-96.48	-285.497	-1273.3	-20.4468
	-96.36	-286.868	-1270.25	-23.4985
	-96.24	-288.849	-1259.27	-22.2778
	-96.12	-286.558	-1263.84	-22.2778
	-96	-284.266	-1259.27	-17.7002
	-95.88	-278.008	-1256.52	-22.583
	-95.76	-289.144	-1250.11	-24.4141
	-95.64	-276.477	-1237.9	-27.4658
	-95.52	-282.425	-1250.72	-19.5313
	-95.4	-283.49	-1249.5	-22.8882
	-95.28	-283.64	-1241.26	-22.583
	-95.16	-280.739	-1222.95	-16.1743
	-95.04	-281.194	-1222.34	-22.583
	-94.92	-268.832	-1227.53	-22.2778
	-94.8	-257.385	-1229.66	-24.1089
	-94.68	-271.573	-1218.07	-22.8882
	-94.56	-260.432	-1210.13	-23.8037
	-94.44	-268.821	-1208.91	-24.4141
	-94.32	-258.595	-1222.65	-21.6675
	-94.2	-265.154	-1213.8	-17.0898
	-94.08	-266.83	-1194.87	-22.583
	-93.96	-253.247	-1180.84	-28.9917
	-93.84	-271.097	-1190.91	-20.4468
	-93.72	-264.228	-1187.86	-19.2261
	-93.6	-256.749	-1181.75	-17.395
	-93.48	-262.697	-1188.47	-18.9209
	-93.36	-259.49	-1175.04	-19.5313
	-93.24	-266.354	-1177.78	-22.8882
	-93.12	-260.706	-1172.9	-24.1089
	-93	-260.551	-1172.29	-18.0054
	-92.88	-252.461	-1175.95	-16.4795
	-92.76	-248.644	-1154.29	-24.7192
	-92.64	-246.047	-1156.12	-21.3623
	-92.52	-242.23	-1161.61	-25.3296
	-92.4	-238.718	-1150.62	-16.7847
	-92.28	-253.211	-1149.1	-18.3106
	-92.16	-246.952	-1149.4	-18.9209
	-92.04	-248.933	-1153.37	-26.8555
	-91.92	-251.83	-1133.84	-15.8691
	-91.8	-235.195	-1139.64	-20.752
	-91.68	-245.721	-1132.31	-14.9536
	-91.56	-240.378	-1124.99	-19.5313
	-91.44	-240.833	-1135.06	-21.9727
	-91.32	-233.964	-1131.09	-15.8691
	-91.2	-241.438	-1119.8	-21.9727
	-91.08	-234.264	-1119.5	-16.7847
	-90.96	-230.447	-1117.36	-18.3106
	-90.84	-235.48	-1115.83	-20.752
	-90.72	-233.493	-1111.56	-18.0054
	-90.6	-237.611	-1114.61	-22.583
	-90.48	-244.78	-1099.66	-20.1416
	-90.36	-234.248	-1100.88	-21.6675
	-90.24	-242.028	-1095.39	-23.4985
	-90.12	-232.717	-1096.91	-26.2451
	-90	-233.478	-1087.45	-18.3106
	-89.88	-238.816	-1088.37	-20.1416
	-89.76	-233.473	-1089.59	-20.4468
	-89.64	-223.247	-1085.93	-21.6675
	-89.52	-230.721	-1077.69	-18.9209
	-89.4	-229.04	-1085.01	-14.0381
	-89.28	-225.833	-1069.14	-14.0381
	-89.16	-220.795	-1073.72	-20.1416
	-89.04	-233.762	-1068.53	-20.1416
	-88.92	-229.945	-1063.95	-18.9209
	-88.8	-221.855	-1058.16	-20.1416
	-88.68	-225.362	-1055.1	-14.3433
	-88.56	-229.479	-1057.85	-16.1743
	-88.44	-231.46	-1061.21	-17.7002
	-88.32	-233.136	-1049.61	-17.395
	-88.2	-221.079	-1050.22	-21.6675
	-88.08	-226.417	-1047.47	-14.0381
	-87.96	-224.431	-1033.13	-23.8037
	-87.84	-238.619	-1032.22	-22.2778
	-87.72	-216.186	-1030.08	-24.4141
	-87.6	-230.679	-1023.06	-16.1743
	-87.48	-219.538	-1032.52	-17.7002
	-87.36	-211.143	-1027.94	-18.9209
	-87.24	-211.903	-1016.65	-14.9536
	-87.12	-205.645	-1019.4	-16.4795
	-87	-213.119	-1015.74	-16.1743
	-86.88	-213.879	-1018.48	-21.9727
	-86.76	-216.165	-1009.33	-16.1743
	-86.64	-205.94	-1005.06	-12.8174
	-86.52	-207.921	-998.036	-17.395
	-86.4	-208.376	-1002.31	-15.564
	-86.28	-202.727	-989.796	-21.9727
	-86.16	-203.488	-1000.17	-21.0571
	-86.04	-199.06	-992.238	-17.395
	-85.92	-197.684	-983.693	-18.9209
	-85.8	-204.548	-986.134	-23.1934
	-85.68	-210.191	-984.608	-19.8364
	-85.56	-212.477	-985.219	-15.2588
	-85.44	-192.791	-989.796	-20.4468
	-85.32	-214.303	-984.608	-17.7002
	-85.2	-205.908	-969.35	-23.1934
	-85.08	-199.345	-961.415	-23.1934
	-84.96	-196.138	-968.739	-20.4468
	-84.84	-202.696	-957.448	-18.3106
	-84.72	-198.574	-957.753	-14.6484
	-84.6	-203.607	-961.11	-12.207
	-84.48	-186.972	-948.293	-19.2261
	-84.36	-179.493	-951.039	-19.8364
	-84.24	-190.934	-946.767	-8.23975
	-84.12	-183.455	-942.189	-20.752
	-84	-190.624	-949.208	-16.7847
	-83.88	-186.807	-922.658	-10.0708
	-83.76	-198.248	-933.034	-18.0054
	-83.64	-202.365	-932.118	-18.6157
	-83.52	-185.731	-931.813	-18.6157
	-83.4	-194.426	-936.086	-15.8691
	-83.28	-195.491	-926.93	-12.8174
	-83.16	-188.622	-922.658	-21.3623
	-83.04	-183.889	-922.963	-19.2261
	-82.92	-191.058	-920.522	-18.9209
	-82.8	-175.644	-917.775	-17.395
	-82.68	-193.494	-914.113	-19.8364
	-82.56	-193.034	-903.432	-11.2915
	-82.44	-195.931	-903.432	-11.5967
	-82.32	-188.146	-906.178	-14.6484
	-82.2	-191.043	-900.075	-18.6157
	-82.08	-184.784	-902.516	-18.0054
	-81.96	-177.305	-899.77	-14.6484
	-81.84	-184.474	-894.887	-15.564
	-81.72	-192.558	-896.413	-20.1416
	-81.6	-189.656	-886.037	-15.8691
	-81.48	-186.755	-886.037	-9.46045
	-81.36	-177.749	-873.524	-17.0898
	-81.24	-177.289	-874.135	-8.8501
	-81.12	-183.848	-863.759	-18.3106
	-81	-173.317	-867.421	-14.6484
	-80.88	-175.908	-861.928	-15.2588
	-80.76	-180.941	-865.895	-18.3106
	-80.64	-177.734	-868.642	-16.7847
	-80.52	-186.429	-855.519	-14.6484
	-80.4	-184.137	-857.961	-20.1416
	-80.28	-188.56	-858.571	-16.4795
	-80.16	-181.386	-847.585	-15.8691
	-80.04	-174.211	-859.181	-12.5122
	-79.92	-173.751	-851.552	-19.2261
	-79.8	-184.582	-837.819	-18.0054
	-79.68	-179.849	-839.65	-18.9209
	-79.56	-171.455	-843.922	-9.76563
	-79.44	-170.994	-832.631	-19.2261
	-79.32	-168.703	-846.364	-14.3433
	-79.2	-168.853	-828.664	-14.6484
	-79.08	-168.698	-824.086	-18.6157
	-78.96	-174.646	-824.391	-14.0381
	-78.84	-160.148	-824.391	-16.1743
	-78.72	-168.232	-818.898	-10.0708
	-78.6	-173.265	-819.814	-14.9536
	-78.48	-163.649	-806.691	-13.1226
	-78.36	-166.241	-814.32	-20.1416
	-78.24	-165.475	-810.048	-19.8364
	-78.12	-173.865	-806.081	-14.9536
	-78	-166.996	-803.334	-13.7329
	-77.88	-163.179	-800.893	-13.4277
	-77.76	-177.367	-795.705	-15.564
	-77.64	-153.103	-803.639	-14.0381
	-77.52	-163.323	-791.127	-13.1226
	-77.4	-167.746	-798.756	-13.4277
	-77.28	-166.065	-788.38	-13.7329
	-77.16	-153.703	-793.263	-14.3433
	-77.04	-145.002	-782.277	-17.0898
	-76.92	-165.904	-788.075	-21.6675
	-76.8	-164.223	-773.427	-20.4468
	-76.68	-161.932	-781.056	-11.5967
	-76.56	-160.861	-772.511	-9.46045
	-76.44	-164.368	-775.563	-16.4795
	-76.32	-155.668	-765.492	-14.9536
	-76.2	-163.753	-769.765	-12.207
	-76.08	-152.306	-759.694	-13.7329
	-75.96	-166.189	-759.389	-15.2588
	-75.84	-164.203	-754.506	-17.395
	-75.72	-153.672	-755.727	-14.6484
	-75.6	-163.282	-752.065	-17.0898
	-75.48	-149.699	-751.759	-12.5122
	-75.36	-150.765	-743.825	-13.1226
	-75.24	-145.116	-744.435	-16.1743
	-75.12	-149.844	-738.332	-10.6812
	-75	-148.773	-738.332	-17.7002
	-74.88	-151.67	-731.313	-14.6484
	-74.76	-148.463	-731.618	-11.9019
	-74.64	-150.749	-732.838	-14.6484
	-74.52	-146.627	-734.364	-11.2915
	-74.4	-144.64	-738.637	-13.4277
	-74.28	-147.537	-728.261	-8.8501
	-74.16	-145.551	-720.631	-11.9019
	-74.04	-154.246	-714.528	-12.207
	-73.92	-145.546	-719.411	-3.96729
	-73.8	-135.93	-710.255	-14.6484
	-73.68	-139.742	-720.937	-12.8174
	-73.56	-130.737	-713.918	-9.15527
	-73.44	-153.775	-707.509	-14.0381
	-73.32	-139.887	-709.035	-14.3433
	-73.2	-125.999	-706.593	-10.9863
	-73.08	-138.051	-705.678	-15.2588
	-72.96	-139.727	-697.438	-9.46045
	-72.84	-149.032	-690.114	-16.7847
	-72.72	-140.942	-692.555	-12.207
	-72.6	-138.345	-706.899	-14.0381
	-72.48	-136.97	-688.893	-14.9536
	-72.36	-138.645	-697.743	-11.5967
	-72.24	-134.218	-686.147	-11.2915
	-72.12	-129.18	-675.465	-11.9019
	-72	-131.771	-677.296	-21.6675
	-71.88	-133.447	-669.362	-11.9019
	-71.76	-125.663	-675.771	-11.9019
	-71.64	-135.273	-667.226	-7.62939
	-71.52	-132.676	-684.926	-11.5967
	-71.4	-130.08	-667.226	-14.0381
	-71.28	-136.333	-662.038	-11.9019
	-71.16	-125.497	-664.479	-8.8501
	-71.04	-131.751	-664.174	-11.9019
	-70.92	-124.271	-667.531	-7.62939
	-70.8	-129.304	-655.934	-10.6812
	-70.68	-122.74	-637.318	-10.9863
	-70.56	-136.318	-659.596	-12.207
	-70.44	-126.397	-653.188	-7.01904
	-70.32	-127.157	-657.155	-10.0708
	-70.2	-125.171	-649.22	-8.8501
	-70.08	-122.575	-643.422	-9.46045
	-69.96	-125.166	-646.474	-13.1226
	-69.84	-127.147	-632.13	-13.4277
	-69.72	-118.447	-639.76	-6.10352
	-69.6	-127.752	-629.994	-14.3433
	-69.48	-125.156	-629.384	-12.8174
	-69.36	-132.935	-633.351	-10.0708
	-69.24	-129.728	-626.942	-4.57764
	-69.12	-125.911	-623.28	-14.3433
	-69	-126.976	-629.994	-11.5967
	-68.88	-134.451	-618.092	-9.15527
	-68.76	-117.816	-621.754	-9.15527
	-68.64	-126.511	-610.158	-8.54492
	-68.52	-129.407	-617.177	-11.2915
	-68.4	-123.149	-601.613	-21.6675
	-68.28	-138.863	-610.158	-6.40869
	-68.16	-125.28	-612.599	-7.93457
	-68.04	-120.547	-601.613	-3.35693
	-67.92	-128.326	-611.684	-12.207
	-67.8	-115.354	-601.308	-10.376
	-67.68	-114.893	-594.899	-9.46045
	-67.56	-122.062	-595.509	-10.376
	-67.44	-118.856	-596.425	-9.76563
	-67.32	-119.616	-595.815	-6.10352
	-67.2	-123.123	-592.152	-10.376
	-67.08	-117.78	-585.744	-15.564
	-66.96	-118.54	-580.861	-3.96729
	-66.84	-116.859	-584.218	-12.8174
	-66.72	-124.333	-585.439	-14.0381
	-66.6	-122.347	-590.932	-5.18799
	-66.48	-122.192	-575.978	-16.4795
	-66.36	-117.764	-570.18	-4.88281
	-66.24	-105.402	-579.64	-6.40869
	-66.12	-112.571	-575.673	-11.2915
	-66	-107.533	-568.349	-10.0708
	-65.88	-109.819	-562.245	-9.15527
	-65.76	-118.209	-560.719	-11.9019
	-65.64	-116.528	-563.771	-6.10352
	-65.52	-108.438	-551.869	-9.46045
	-65.4	-117.133	-561.024	-11.2915
	-65.28	-107.823	-557.973	-11.9019
	-65.16	-111.33	-555.836	-14.3433
	-65.04	-112.7	-547.292	-10.376
	-64.92	-101.559	-550.954	-8.54492
	-64.8	-116.052	-555.531	-8.8501
	-64.68	-106.742	-552.785	-3.35693
	-64.56	-112.385	-547.902	-8.8501
	-64.44	-108.873	-548.512	-10.6812
	-64.32	-109.328	-540.883	-14.0381
	-64.2	-107.952	-539.052	-9.15527
	-64.08	-108.102	-532.033	-10.9863
	-63.96	-107.336	-539.357	-11.9019
	-63.84	-107.181	-527.455	-11.2915
	-63.72	-112.214	-530.812	-8.8501
	-63.6	-101.073	-525.319	-5.49316
	-63.48	-103.969	-524.403	-5.49316
	-63.36	-102.288	-535.39	-7.01904
	-63.24	-108.847	-515.248	-3.66211
	-63.12	-106.25	-525.319	-12.8174
	-63	-99.6863	-512.807	-8.23975
	-62.88	-109.297	-509.145	-10.9863
	-62.76	-104.259	-523.488	-10.376
	-62.64	-107.155	-503.041	-14.0381
	-62.52	-110.967	-513.417	-6.71387
	-62.4	-102.878	-503.957	-7.01904
	-62.28	-103.943	-513.112	-7.62939
	-62.16	-107.145	-499.074	-12.8174
	-62.04	-105.159	-504.262	-7.93457
	-61.92	-89.1344	-492.97	-5.79834
	-61.8	-94.1672	-496.022	-10.0708
	-61.68	-96.4535	-490.224	-0.91553
	-61.56	-92.9414	-493.275	-7.93457
	-61.44	-95.2276	-503.957	-8.54492
	-61.32	-97.2086	-485.341	-9.76563
	-61.2	-101.631	-482.899	-6.40869
	-61.08	-92.6258	-481.679	-10.9863
	-60.96	-93.3862	-482.594	-1.52588
	-60.84	-96.5879	-482.289	-4.88281
	-60.72	-94.2965	-472.829	-8.23975
	-60.6	-100.245	-481.068	-6.10352
	-60.48	-99.1742	-481.068	-11.9019
	-60.36	-101.155	-474.965	-8.54492
	-60.24	-91.5396	-470.082	-2.44141
	-60.12	-94.131	-480.458	-11.2915
	-60	-94.8914	-471.303	-5.49316
	-59.88	-93.5155	-470.387	-4.57764
	-59.76	-79.9326	-464.284	-6.71387
	-59.64	-101.445	-470.387	-10.0708
	-59.52	-98.8483	-456.654	-6.71387
	-59.4	-84.9602	-456.96	2.74658
	-59.28	-91.2137	-457.57	-12.8174
	-59.16	-90.4482	-451.161	-10.0708
	-59.04	-93.9551	-451.161	-12.8174
	-58.92	-94.1051	-453.908	-4.27246
	-58.8	-103.41	-441.701	-6.10352
	-58.68	-87.9964	-456.349	-5.18799
	-58.56	-90.5878	-445.973	-7.62939
	-58.44	-100.809	-432.24	-5.79834
	-58.32	-91.8034	-437.123	-10.376
	-58.2	-88.2913	-440.785	-3.96729
	-58.08	-92.4085	-438.344	-7.93457
	-57.96	-87.9809	-436.513	-1.83105
	-57.84	-84.774	-427.663	-9.76563
	-57.72	-89.8068	-430.409	-6.71387
	-57.6	-86.905	-442.006	-7.32422
	-57.48	-87.9706	-430.104	-4.88281
	-57.36	-79.5756	-424.306	-9.15527
	-57.24	-83.6929	-432.851	-2.44141
	-57.12	-83.8429	-416.066	-9.46045
	-57	-83.6877	-427.968	-10.6812
	-56.88	-82.617	-417.287	-6.71387
	-56.76	-76.3584	-417.897	-1.83105
	-56.64	-81.3912	-417.592	-4.27246
	-56.52	-79.4049	-413.625	-11.2915
	-56.4	-87.7947	-418.507	-9.15527
	-56.28	-76.9584	-413.014	-2.13623
	-56.16	-88.0947	-407.521	-5.49316
	-56.04	-71.7652	-410.268	-2.13623
	-55.92	-74.967	-409.657	-11.9019
	-55.8	-78.1687	-401.112	-4.88281
	-55.68	-75.8773	-398.976	-6.71387
	-55.56	-81.2153	-403.249	0
	-55.44	-75.2618	-396.23	-2.74658
	-55.32	-84.8722	-395.924	-3.66211
	-55.2	-78.3084	-395.619	-8.23975
	-55.08	-84.5619	-394.093	-3.35693
	-54.96	-74.6411	-388.6	-5.79834
	-54.84	-80.2842	-392.873	-0.30518
	-54.72	-80.7394	-384.023	-6.40869
	-54.6	-79.6687	-381.276	-7.01904
	-54.48	-76.7669	-379.445	-6.40869
	-54.36	-87.9033	-377.003	-4.27246
	-54.24	-74.0152	-384.633	-7.62939
	-54.12	-69.8927	-385.243	-7.62939
	-54	-82.2498	-384.633	-12.5122
	-53.88	-75.0755	-374.562	-6.40869
	-53.76	-70.9531	-372.731	-3.35693
	-53.64	-69.272	-370.595	-7.32422
	-53.52	-70.3376	-371.51	-3.66211
	-53.4	-67.741	-376.393	-4.57764
	-53.28	-77.3514	-366.628	-8.54492
	-53.16	-73.8393	-370.29	-0.30518
	-53.04	-71.2427	-376.393	-11.5967
	-52.92	-76.8859	-364.491	-6.10352
	-52.8	-65.7444	-365.712	-12.207
	-52.68	-72.9134	-371.51	-1.2207
	-52.56	-70.3168	-361.44	-2.13623
	-52.44	-74.7393	-358.083	-1.52588
	-52.32	-69.091	-354.726	0
	-52.2	-77.4807	-365.102	-6.71387
	-52.08	-65.4237	-356.862	-7.93457
	-51.96	-68.6254	-357.472	-3.05176
	-51.84	-71.522	-344.96	-4.27246
	-51.72	-66.484	-355.641	-1.2207
	-51.6	-72.4324	-356.252	1.2207
	-51.48	-61.5961	-340.688	-5.18799
	-51.36	-72.7324	-347.401	-1.83105
	-51.24	-66.1685	-347.707	-3.96729
	-51.12	-71.5065	-348.622	-7.93457
	-51	-67.384	-347.096	-6.40869
	-50.88	-67.534	-342.213	-1.83105
	-50.76	-61.8857	-342.519	-1.52588
	-50.64	-61.4253	-344.044	-7.62939
	-50.52	-66.7633	-328.481	1.52588
	-50.4	-76.0686	-337.941	-5.18799
	-50.28	-64.0116	-339.467	-2.13623
	-50.16	-58.9736	-325.429	-2.13623
	-50.04	-66.753	-330.617	-6.10352
	-49.92	-64.1564	-325.429	-7.32422
	-49.8	-59.1184	-324.513	-5.18799
	-49.68	-61.7098	-321.156	-0.61035
	-49.56	-56.3667	-326.955	-5.18799
	-49.44	-65.6719	-326.344	-3.96729
	-49.32	-58.8029	-314.137	-3.05176
	-49.2	-57.7322	-318.105	-2.74658
	-49.08	-63.6805	-324.818	-0.91553
	-48.96	-64.1357	-310.78	-3.96729
	-48.84	-51.4683	-310.17	1.2207
	-48.72	-49.7873	-315.358	-6.40869
	-48.6	-56.0408	-305.898	-5.49316
	-48.48	-55.5804	-316.884	-4.27246
	-48.36	-61.5288	-309.254	0
	-48.24	-58.627	-308.339	-2.44141
	-48.12	-58.777	-297.047	-1.83105
	-48	-60.7581	-307.423	-4.57764
	-47.88	-61.2132	-311.086	-2.44141
	-47.76	-58.9218	-307.118	-1.52588
	-47.64	-57.8511	-297.047	-6.71387
	-47.52	-54.0338	-298.268	-2.13623
	-47.4	-66.696	-294.301	0
	-47.28	-61.0477	-300.404	-8.54492
	-47.16	-51.7373	-289.723	-4.57764
	-47.04	-65.6202	-292.165	5.49316
	-46.92	-57.5304	-292.47	-2.13623
	-46.8	-60.427	-287.892	-4.27246
	-46.68	-51.1166	-293.385	-3.05176
	-46.56	-55.2338	-289.113	-1.2207
	-46.44	-55.9942	-280.873	-10.0708
	-46.32	-54.008	-292.165	-0.91553
	-46.2	-53.5476	-280.568	0.30518
	-46.08	-45.763	-289.723	-0.61035
	-45.96	-64.8339	-280.873	-2.13623
	-45.84	-49.42	-272.023	-0.91553
	-45.72	-49.2648	-272.939	0.30518
	-45.6	-50.9407	-278.432	-2.74658
	-45.48	-49.87	-259.206	-2.74658
	-45.36	-46.3579	-271.718	-7.01904
	-45.24	-44.982	-270.497	1.2207
	-45.12	-42.3854	-275.075	-3.96729
	-45	-56.5735	-268.666	-1.52588
	-44.88	-58.8597	-269.582	0
	-44.76	-48.6337	-256.459	-2.44141
	-44.64	-51.2252	-257.375	-5.18799
	-44.52	-46.4923	-269.582	0
	-44.4	-53.9666	-261.647	-5.18799
	-44.28	-54.7269	-266.225	-4.88281
	-44.16	-45.1113	-270.192	2.13623
	-44.04	-46.1768	-259.206	-8.54492
	-43.92	-42.3595	-258.9	-8.54492
	-43.8	-49.2234	-257.375	2.74658
	-43.68	-47.2372	-244.862	-4.88281
	-43.56	-45.5561	-245.473	-1.2207
	-43.44	-46.9268	-254.933	-4.88281
	-43.32	-43.4147	-246.693	-5.49316
	-43.2	-38.9871	-254.323	-2.44141
	-43.08	-45.5458	-246.999	-2.44141
	-42.96	-30.1318	-245.778	2.13623
	-42.84	-54.6959	-242.726	-4.27246
	-42.72	-45.3854	-244.862	-2.44141
	-42.6	-47.9768	-249.135	5.79834
	-42.48	-38.056	-244.252	-2.13623
	-42.36	-45.8354	-237.538	2.13623
	-42.24	-44.7647	-233.571	-0.30518
	-42.12	-54.07	-237.843	-7.01904
	-42	-36.825	-238.149	0.30518
	-41.88	-41.5526	-240.285	-1.83105
	-41.76	-41.7026	-232.35	2.44141
	-41.64	-43.9888	-237.233	3.35693
	-41.52	-46.8854	-225.636	-0.91553
	-41.4	-48.2561	-230.519	-3.35693
	-41.28	-39.556	-230.824	0.91553
	-41.16	-45.5043	-225.636	-0.30518
	-41.04	-47.1802	-231.74	-0.91553
	-40.92	-40.3112	-222.89	2.44141
	-40.8	-37.1043	-225.331	-2.74658
	-40.68	-38.7801	-218.007	-1.52588
	-40.56	-45.3388	-218.007	1.83105
	-40.44	-38.4698	-215.26	-3.05176
	-40.32	-47.7751	-211.293	-5.79834
	-40.2	-48.2302	-215.26	-1.52588
	-40.08	-43.8026	-214.345	-6.10352
	-39.96	-45.4785	-216.176	-3.35693
	-39.84	-43.4922	-204.579	-3.96729
	-39.72	-35.7077	-215.871	0.30518
	-39.6	-41.656	-212.209	2.13623
	-39.48	-46.6888	-213.124	0.30518
	-39.36	-36.768	-212.514	-7.01904
	-39.24	-44.8526	-212.514	0.61035
	-39.12	-39.8146	-207.631	-3.96729
	-39	-38.1335	-211.598	1.2207
	-38.88	-37.0628	-209.462	-5.18799
	-38.76	-33.5507	-205.8	0
	-38.64	-33.0904	-207.936	1.83105
	-38.52	-25.0006	-204.884	3.66211
	-38.4	-44.0715	-203.664	-3.66211
	-38.28	-33.5404	-202.748	3.66211
	-38.16	-33.9956	-196.034	-1.52588
	-38.04	-32.6197	-197.255	7.62939
	-37.92	-31.549	-195.424	-2.13623
	-37.8	-39.3284	-198.476	0.61035
	-37.68	-34.9007	-192.983	0
	-37.56	-29.8627	-184.743	2.13623
	-37.44	-32.7593	-185.353	-1.52588
	-37.32	-30.7731	-197.255	-0.30518
	-37.2	-40.6887	-192.983	-3.35693
	-37.08	-36.5663	-190.541	3.96729
	-36.96	-35.8007	-189.931	-3.96729
	-36.84	-42.0543	-186.269	-3.05176
	-36.72	-46.1715	-187.489	-4.57764
	-36.6	-40.218	-175.893	-0.61035
	-36.48	-37.3163	-185.658	2.13623
	-36.36	-37.1611	-179.25	-0.30518
	-36.24	-36.3956	-181.081	-1.83105
	-36.12	-38.0714	-173.451	-0.91553
	-36	-40.6628	-170.399	-0.91553
	-35.88	-27.9955	-168.263	6.40869
	-35.76	-32.4179	-174.367	0.91553
	-35.64	-34.0938	-172.536	5.79834
	-35.52	-44.6198	-170.705	0.91553
	-35.4	-30.4265	-179.555	2.74658
	-35.28	-37.5956	-166.737	7.32422
	-35.16	-28.5903	-174.672	2.44141
	-35.04	-31.4869	-177.113	2.13623
	-34.92	-34.0783	-170.094	1.52588
	-34.8	-30.8713	-171.01	4.88281
	-34.68	-37.1249	-169.789	-6.71387
	-34.56	-30.8662	-171.62	-0.61035
	-34.44	-32.2369	-168.263	1.83105
	-34.32	-36.3542	-167.043	2.74658
	-34.2	-29.7903	-169.484	-5.79834
	-34.08	-33.6024	-166.432	-1.52588
	-33.96	-29.1748	-163.075	3.66211
	-33.84	-23.5264	-164.906	3.05176
	-33.72	-36.1886	-168.568	2.44141
	-33.6	-37.5593	-161.549	0.91553
	-33.48	-33.1317	-161.549	-0.61035
	-33.36	-23.2109	-158.803	6.10352
	-33.24	-23.9712	-150.258	0
	-33.12	-29.3092	-159.413	3.96729
	-33	-30.9851	-157.887	2.13623
	-32.88	-30.8299	-151.784	-0.61035
	-32.76	-28.8437	-158.803	1.83105
	-32.64	-34.1817	-157.582	-2.44141
	-32.52	-25.4816	-156.361	-3.96729
	-32.4	-28.9885	-150.258	0
	-32.28	-26.0868	-147.816	5.79834
	-32.16	-33.561	-153.92	-3.96729
	-32.04	-24.2505	-142.323	3.66211
	-31.92	-37.2179	-153.31	5.18799
	-31.8	-29.7385	-147.511	3.66211
	-31.68	-27.1419	-140.797	0.91553
	-31.56	-21.4936	-141.408	1.83105
	-31.44	-27.7471	-146.596	1.52588
	-31.32	-24.235	-146.291	1.52588
	-31.2	-35.9817	-136.22	1.52588
	-31.08	-23.3143	-143.544	2.44141
	-30.96	-21.3281	-144.154	4.88281
	-30.84	-30.3282	-141.103	-1.2207
	-30.72	-20.4074	-132.253	0.61035
	-30.6	-23.304	-127.065	1.83105
	-30.48	-29.2523	-138.966	3.05176
	-30.36	-24.5195	-136.525	3.35693
	-30.24	-27.7212	-125.233	0.61035
	-30.12	-27.8712	-133.168	4.57764
	-30	-27.7161	-134.084	4.27246
	-29.88	-15.659	-132.863	-1.83105
	-29.76	-22.8281	-127.675	2.74658
	-29.64	-25.1143	-132.253	2.13623
	-29.52	-28.0109	-130.727	3.05176
	-29.4	-29.6868	-127.98	4.88281
	-29.28	-26.1747	-125.233	4.27246
	-29.16	-24.4936	-123.097	-3.96729
	-29.04	-22.2022	-132.253	-0.91553
	-28.92	-23.5729	-128.59	1.52588
	-28.8	-17.3142	-126.149	11.2915
	-28.68	-22.347	-133.168	3.05176
	-28.56	-28.2954	-123.097	-1.52588
	-28.44	-24.7833	-116.383	7.93457
	-28.32	-25.2384	-116.994	3.96729
	-28.2	-15.3176	-120.351	4.88281
	-28.08	-17.2987	-114.247	-0.30518
	-27.96	-18.3642	-117.604	1.52588
	-27.84	-17.2935	-118.825	2.13623
	-27.72	-22.6315	-120.656	2.13623
	-27.6	-25.8333	-110.28	3.35693
	-27.48	-20.7953	-117.909	-3.05176
	-27.36	-24.6074	-111.806	4.27246
	-27.24	-18.0435	-119.13	-0.91553
	-27.12	-17.5832	-109.975	2.74658
	-27	-19.8694	-113.637	5.49316
	-26.88	-16.0521	-103.871	-2.74658
	-26.76	-19.8642	-109.975	3.66211
	-26.64	-12.69	-105.702	3.05176
	-26.52	-23.5211	-108.754	0.61035
	-26.4	-18.4832	-111.501	7.93457
	-26.28	-19.2435	-103.871	5.49316
	-26.16	-14.2055	-100.819	2.13623
	-26.04	-14.6607	-106.313	10.6812
	-25.92	-9.92788	-104.176	3.66211
	-25.8	-14.9607	-99.5987	4.57764
	-25.68	-18.7728	-106.618	-2.74658
	-25.56	-20.1435	-98.0728	1.83105
	-25.44	-20.9039	-104.482	-5.49316
	-25.32	-23.1901	-101.43	7.32422
	-25.2	-16.9314	-100.819	-2.44141
	-25.08	-18.6073	-98.0728	3.05176
	-24.96	-18.1469	-97.1573	-1.52588
	-24.84	-20.4332	-93.4952	1.2207
	-24.72	-19.0573	-102.04	10.376
	-24.6	-18.5969	-97.1573	4.27246
	-24.48	-16.0003	-97.1573	4.27246
	-24.36	-24.0849	-92.5797	-0.61035
	-24.24	-28.2022	-98.378	0.30518
	-24.12	-24.9953	-95.6314	7.32422
	-24	-18.1262	-89.8331	8.8501
	-23.88	-25.9056	-89.8331	-1.83105
	-23.76	-15.6796	-91.6641	5.79834
	-23.64	-26.816	-92.8848	-2.74658
	-23.52	-19.6418	-86.171	5.49316
	-23.4	-25.8953	-91.9693	-0.91553
	-23.28	-10.1761	-83.7296	3.66211
	-23.16	-9.4106	-92.8848	6.71387
	-23.04	-16.5796	-82.5089	-0.91553
	-22.92	-19.7814	-77.9312	7.62939
	-22.8	-12.9124	-83.1192	5.18799
	-22.68	-17.64	-85.5606	6.10352
	-22.56	-15.6538	-82.5089	0.91553
	-22.44	-10.0054	-77.9312	2.44141
	-22.32	-22.3625	-80.0675	9.76563
	-22.2	-14.2727	-75.1847	7.01904
	-22.08	-19.3055	-80.6778	6.10352
	-21.96	-13.352	-75.1847	4.88281
	-21.84	-4.6519	-79.7623	-2.44141
	-21.72	-14.2624	-82.5089	8.23975
	-21.6	-8.00366	-65.1139	2.44141
	-21.48	-6.93296	-75.4898	6.71387
	-21.36	-8.60884	-76.4054	5.18799
	-21.24	-7.53814	-70.9122	7.32422
	-21.12	-15.3175	-77.6261	4.27246
	-21	-7.53296	-72.4381	9.46045
	-20.88	-8.90366	-72.7432	6.10352
	-20.76	-16.0727	-71.5225	3.96729
	-20.64	-22.9366	-80.983	5.79834
	-20.52	-12.7106	-60.8414	3.35693
	-20.4	-0.65356	-69.6915	6.10352
	-20.28	-6.29673	-76.1002	11.5967
	-20.16	-4.61567	-75.795	7.01904
	-20.04	-9.34331	-71.2174	9.46045
	-19.92	-15.2917	-69.9967	4.88281
	-19.8	-15.4417	-67.5553	6.40869
	-19.68	-12.5399	-75.4898	6.71387
	-19.56	-14.2158	-69.9967	8.8501
	-19.44	-10.7037	-68.1656	11.9019
	-19.32	-10.8537	-67.5553	10.0708
	-19.2	-6.12085	-72.4381	5.49316
	-19.08	-3.52427	-66.3346	9.15527
	-18.96	-15.271	-66.3346	7.62939
	-18.84	-6.57085	-69.9967	7.01904
	-18.72	-9.16226	-57.4845	6.10352
	-18.6	-9.92261	-62.3673	6.10352
	-18.48	-8.54673	-62.9776	3.96729
	-18.36	-16.6313	-58.0948	8.54492
	-18.24	-15.5606	-60.231	6.71387
	-18.12	-18.7624	-61.1466	4.88281
	-18	-11.8933	-65.7242	5.49316
	-17.88	-12.9588	-60.8414	3.96729
	-17.76	-12.4985	-62.3673	9.76563
	-17.64	-0.74663	-52.2965	7.01904
	-17.52	-9.74673	-57.7896	1.52588
	-17.4	-12.033	-50.1602	5.49316
	-17.28	-13.0985	-54.7379	6.71387
	-17.16	-5.92427	-52.9068	6.40869
	-17.04	-6.68462	-50.4654	4.88281
	-16.92	-13.5485	-55.9586	4.88281
	-16.8	-5.76392	-46.4981	8.8501
	-16.68	-9.27085	-54.7379	5.79834
	-16.56	-7.28462	-55.9586	10.9863
	-16.44	0.49995	-44.0567	3.96729
	-16.32	-8.50015	-56.5689	6.10352
	-16.2	-7.12427	-44.0567	7.01904
	-16.08	-3.30698	-48.6344	9.76563
	-15.96	-2.23628	-46.8033	8.23975
	-15.84	-1.47075	-50.7706	5.18799
	-15.72	-8.02944	-44.0567	6.10352
	-15.6	0.0603	-39.4791	8.23975
	-15.48	1.13101	-46.4981	6.10352
	-15.36	-9.0898	-42.836	7.93457
	-15.24	-14.4278	-41.9205	9.76563
	-15.12	-2.37075	-41.005	9.15527
	-15	-7.70874	-49.8551	7.32422
	-14.88	-3.58628	-34.9014	8.23975
	-14.76	-4.04145	-49.8551	8.54492
	-14.64	-13.3467	-38.8687	13.1226
	-14.52	-11.0553	-35.2066	9.15527
	-14.4	-8.76392	-48.024	10.9863
	-14.28	-9.52427	-46.8033	5.79834
	-14.16	-6.92769	-37.9532	8.54492
	-14.04	-10.7398	-39.4791	6.40869
	-13.92	-6.31216	-46.193	1.83105
	-13.8	-2.80005	-44.9722	12.8174
	-13.68	-1.11899	-40.0894	10.0708
	-13.56	-1.57417	-35.817	9.15527
	-13.44	5.60005	-43.4464	6.40869
	-13.32	-9.50356	-37.0377	7.01904
	-13.2	-9.95874	-32.1549	6.40869
	-13.08	-5.22593	-37.3429	7.01904
	-12.96	-15.1416	-39.7843	10.0708
	-12.84	-0.64312	-33.6807	9.15527
	-12.72	-7.20181	-35.5118	8.23975
	-12.6	-7.96216	-29.1031	11.9019
	-12.48	-2.00864	-31.2393	8.23975
	-12.36	-1.24312	-32.7652	3.35693
	-12.24	-6.27593	-36.1222	8.23975
	-12.12	2.72935	-33.3756	8.8501
	-12	1.96899	-38.2584	5.79834
	-11.88	0.29312	-31.8497	2.74658
	-11.76	-0.16206	-32.7652	5.79834
	-11.64	3.65523	-26.0514	9.15527
	-11.52	-2.29311	-29.7135	14.6484
	-11.4	-2.44312	-37.648	3.96729
	-11.28	2.2897	-22.3892	12.5122
	-11.16	-7.9311	-28.7979	6.40869
	-11.04	1.9897	-26.0514	11.2915
	-10.92	5.50181	-19.9478	5.79834
	-10.8	-9.60181	-20.5582	11.9019
	-10.68	-5.78452	-31.8497	7.62939
	-10.56	1.69487	-29.4083	10.6812
	-10.44	5.20698	-28.7979	11.2915
	-10.32	-4.09829	-27.5772	7.32422
	-10.2	1.24487	-25.7462	9.76563
	-10.08	-1.04136	-22.6944	16.7847
	-9.96	-6.07417	-20.253	11.2915
	-9.84	-8.66558	-17.2013	4.88281
	-9.72	-6.06899	-19.6427	9.15527
	-9.6	-0.11548	-20.8634	14.0381
	-9.48	0.34487	-21.7789	8.54492
	-9.36	-4.99312	-24.2203	11.5967
	-9.24	-1.78618	-2.24763	8.8501
	-9.12	-6.81899	-26.6617	11.5967
	-9	-2.69653	-26.0514	10.9863
	-8.88	3.56216	-21.7789	15.8691
	-8.76	-3.91206	-22.3892	11.5967
	-8.64	2.04146	-9.87703	3.66211
	-8.52	-6.04311	-17.2013	7.93457
	-8.4	7.23462	-13.234	10.376
	-8.28	-2.37583	-17.2013	10.9863
	-8.16	2.35698	-14.7598	10.6812
	-8.04	-0.5396	-11.7081	14.3433
	-7.92	2.05698	-18.422	9.15527
	-7.8	0.3811	-9.57185	11.5967
	-7.68	9.0812	-18.7271	10.0708
	-7.56	6.79497	-9.26668	14.6484
	-7.44	-2.5103	-11.4029	10.376
	-7.32	1.00181	-12.3184	10.376
	-7.2	-2.19995	-17.2013	8.54492
	-7.08	-2.65513	-17.2013	5.79834
	-6.96	-2.80513	-6.82527	6.40869
	-6.84	3.75874	-7.43562	5.49316
	-6.72	2.69321	-8.9615	9.76563
	-6.6	-3.86548	-12.0133	8.8501
	-6.48	5.44497	-8.04597	16.4795
	-6.36	7.4312	-12.9288	7.93457
	-6.24	2.09321	-10.7926	10.6812
	-6.12	1.33286	-2.24763	7.32422
	-6	-1.8689	-10.7926	13.7329
	-5.88	-1.71372	-7.43562	14.6484
	-5.76	-0.03267	-9.57185	11.5967
	-5.64	-0.48784	-6.21492	8.54492
	-5.52	5.46567	-8.04597	17.0898
	-5.4	0.43286	-9.87703	7.32422
	-5.28	-3.68442	-4.99422	6.40869
	-5.16	-1.08784	-3.77351	13.1226
	-5.04	-2.76372	-3.46834	10.9863
	-4.92	0.13804	-4.68904	10.0708
	-4.8	-0.31714	2.02483	8.23975
	-4.68	5.02603	-5.90974	14.0381
	-4.56	3.04497	1.41447	5.18799
	-4.44	-4.42925	-7.13045	9.76563
	-4.32	1.21909	-6.82527	2.74658
	-4.2	8.39331	2.02483	7.01904
	-4.08	-4.87925	5.68694	11.2915
	-3.96	11.1451	6.29729	3.96729
	-3.84	0.00874	0.19377	7.93457
	-3.72	9.92954	-6.5201	15.564
	-3.6	-4.8689	0.49895	15.2588
	-3.48	8.71401	1.71965	15.8691
	-3.36	3.07085	-4.07869	11.2915
	-3.24	-1.96196	-9.26668	11.5967
	-3.12	-4.24819	3.5507	13.1226
	-3	6.58813	2.63518	12.8174
	-2.88	5.21743	-2.85799	18.9209
	-2.76	-2.56196	8.73869	7.01904
	-2.64	-0.88091	1.41447	10.9863
	-2.52	10.2606	2.02483	9.15527
	-2.4	3.09155	-6.5201	11.9019
	-2.28	6.90884	2.02483	17.0898
	-2.16	4.92778	4.77141	18.0054
	-2.04	3.2519	6.60246	18.3105
	-1.92	7.98472	6.60246	8.23975
	-1.8	0.5105	11.1801	10.376
	-1.68	1.27603	7.82317	13.7329
	-1.56	4.17778	9.34904	9.76563
	-1.44	3.41743	3.5507	14.3433
	-1.32	5.40366	8.43352	15.8691
	-1.2	4.94849	9.04387	5.79834
	-1.08	7.85024	4.46623	7.93457
	-0.96	5.25884	2.33	10.0708
	-0.84	8.46577	11.4853	10.0708
	-0.72	-0.8395	6.60246	16.1743
	-0.6	3.28296	4.46623	12.5122
	-0.48	4.65884	13.3163	14.3433
	-0.36	4.81401	8.73869	12.5122
	-0.24	-0.82915	8.73869	13.1226
	-0.12	12.4486	14.537	10.0708
	1.52e-12	5.27954	1.71965	4.88281
	0.12	-0.36362	11.7904	14.6484
	0.24	6.50542	12.706	15.564
	0.36	6.96577	10.2646	15.2588
	0.48	8.64683	7.51799	5.18799
	0.6	-0.65845	9.34904	12.8174
	0.72	3.46401	20.3354	14.3433
	0.84	10.6382	3.5507	12.5122
	0.96	6.52095	10.8749	11.5967
	1.08	10.0331	11.7904	14.0381
	1.2	4.38989	17.5888	6.71387
	1.32	-2.77915	8.12834	14.9536
	1.44	1.64849	21.2509	18.0054
	1.56	10.0434	10.2646	12.207
	1.68	5.0106	12.706	10.6812
	1.8	12.1848	12.0956	9.15527
	1.92	-0.17222	13.0112	18.0054
	2.04	12.19	10.2646	16.7847
	2.16	5.02095	13.6215	14.6484
	2.28	12.8055	12.4008	14.0381
	2.4	9.90894	16.0629	14.6484
	2.52	8.53823	14.537	14.3433
	2.64	13.8814	23.9975	14.9536
	2.76	5.79683	16.9784	7.93457
	2.88	8.39341	14.8422	17.0898
	3	6.41235	14.537	9.46045
	3.12	12.9762	27.6596	20.1416
	3.24	12.8262	20.0302	15.8691
	3.36	9.31929	17.894	17.0898
	3.48	10.6952	21.2509	17.395
	3.6	12.3762	26.4389	18.9209
	3.72	1.85024	25.2182	13.1226
	3.84	13.2969	22.4716	14.3433
	3.96	11.9262	21.8612	17.7002
	4.08	11.7762	21.5561	15.2588
	4.2	7.96411	21.2509	14.0381
	4.32	7.50894	24.6078	17.395
	4.44	18.6504	28.5751	14.9536
	4.56	9.03999	25.5234	14.9536
	4.68	7.66929	23.0819	14.9536
	4.8	6.90894	18.1991	15.2588
	4.92	17.7453	17.894	19.8364
	5.04	10.5762	27.9648	10.0708
	5.16	10.7314	24.6078	13.4277
	5.28	11.8021	25.2182	14.9536
	5.4	4.02271	22.4716	21.0571
	5.52	14.5539	22.7768	18.0054
	5.64	12.878	25.5234	16.1743
	5.76	8.45552	31.0165	14.0381
	5.88	0.9813	29.7958	18.9209
	6	12.428	24.913	16.7847
	6.12	11.0573	29.1855	9.46045
	6.24	14.2642	28.5751	20.4468
	6.36	9.84175	24.6078	15.2588
	6.48	7.25034	25.2182	14.6484
	6.6	7.10034	32.2372	13.4277
	6.72	10.3073	31.0165	16.4795
	6.84	9.54692	35.5942	21.3623
	6.96	9.09175	24.3027	14.6484
	7.08	15.6556	18.8095	15.564
	7.2	13.6746	29.7958	21.0571
	7.32	13.2194	29.7958	14.9536
	7.44	11.2383	25.8285	22.583
	7.56	6.81587	32.5424	16.4795
	7.68	10.6332	34.0683	14.0381
	7.8	7.4314	31.9321	16.1743
	7.92	9.11245	26.4389	15.8691
	8.04	22.085	34.0683	20.1416
	8.16	20.104	43.2236	19.2261
	8.28	12.0194	28.2699	17.0898
	8.4	14.0056	34.6786	15.2588
	8.52	14.7711	22.1664	19.8364
	8.64	11.2642	42.9184	10.9863
	8.76	13.8608	36.8149	11.2915
	8.88	6.0814	30.7113	14.3433
	9	12.0349	33.7631	15.8691
	9.12	14.0211	33.4579	18.9209
	9.24	16.0074	28.5751	16.7847
	9.36	10.9746	35.5942	21.3623
	9.48	18.7591	28.2699	20.752
	9.6	3.96069	28.8803	10.6812
	9.72	9.30386	30.4062	10.0708
	9.84	9.15386	35.289	12.5122
	9.96	19.0747	37.4252	14.3433
	10.08	12.2108	38.0356	21.6675
	10.2	11.1453	40.1718	18.0054
	10.32	22.8971	41.3925	19.5312
	10.44	9.62456	34.9838	15.2588
	10.56	7.03315	37.12	13.1226
	10.68	16.0384	35.8993	17.395
	10.8	17.7195	40.477	12.8174
	10.92	11.7711	34.0683	17.395
	11.04	13.4522	40.7822	22.583
	11.16	10.2504	40.7822	15.2588
	11.28	18.035	45.0546	19.2261
	11.4	4.45728	31.9321	13.4277
	11.52	6.44351	40.7822	12.8174
	11.64	21.8575	35.5942	22.583
	11.76	11.6367	46.5805	15.564
	11.88	12.7074	41.0873	20.4468
	12	21.4075	29.4906	14.3433
	12.12	8.44009	38.0356	19.2261
	12.24	12.8677	42.6132	19.2261
	12.36	14.2436	43.5287	17.0898
	12.48	13.1781	47.496	13.7329
	12.6	9.36597	38.3407	21.6675
	12.72	7.99526	38.6459	13.1226
	12.84	5.09868	41.3925	21.9727
	12.96	20.2075	31.0165	19.8364
	13.08	15.4798	42.9184	20.752
	13.2	11.3626	49.3271	19.8364
	13.32	11.2126	42.6132	18.0054
	13.44	14.4195	52.3788	21.0571
	13.56	16.1005	42.9184	18.3105
	13.68	12.8988	38.3407	21.3623
	13.8	10.6126	41.3925	18.9209
	13.92	15.0402	39.5615	21.3623
	14.04	17.0264	47.8012	23.1934
	14.16	19.3178	42.0029	16.7847
	14.28	14.8954	43.2236	17.7002
	14.4	21.1541	49.0219	16.1743
	14.52	18.5626	53.9047	19.2261
	14.64	12.9195	46.2753	21.0571
	14.76	19.1782	41.3925	18.3105
	14.88	10.7884	36.8149	23.4985
	15	13.9954	49.6322	16.4795
	15.12	13.5402	44.4443	18.3105
	15.24	10.6436	49.6322	19.5312
	15.36	15.9868	41.6977	17.0898
	15.48	7.9022	35.5942	19.5312
	15.6	18.7385	49.3271	21.9727
	15.72	14.0109	49.3271	26.5503
	15.84	8.97808	48.7167	18.3105
	15.96	16.4575	48.1064	26.8555
	16.08	21.4955	48.4115	24.1089
	16.2	14.3264	52.9892	28.6865
	16.32	12.6505	37.4252	19.8364
	16.44	19.2144	50.8529	20.752
	16.56	18.1489	43.5287	17.7002
	16.68	15.2523	45.0546	23.4985
	16.8	10.2195	53.2944	18.9209
	16.92	17.3937	54.2099	20.1416
	17.04	14.4971	53.9047	20.4468
	17.16	15.873	51.1581	22.8882
	17.28	26.099	51.1581	23.8037
	17.4	22.8972	60.3134	20.752
	17.52	11.4557	50.5478	24.7192
	17.64	13.4419	49.3271	14.9536
	17.76	18.4799	50.5478	20.4468
	17.88	8.56431	48.1064	24.4141
	18	12.9919	52.0737	21.0571
	18.12	14.673	53.2944	18.9209
	18.24	11.7764	52.3788	20.1416
	18.36	17.1196	55.7358	27.4658
	18.48	22.1576	56.6513	18.6157
	18.6	13.7678	52.684	22.2778
	18.72	21.8576	47.8012	22.583
	18.84	22.0127	53.2944	20.752
	18.96	8.74019	48.4115	27.4658
	19.08	20.492	52.3788	18.0054
	19.2	22.1731	49.6322	18.6157
	19.32	17.4455	49.3271	22.2778
	19.44	13.6334	51.7685	18.3105
	19.56	7.37983	56.3461	22.583
	19.68	14.8592	56.0409	17.395
	19.8	19.8972	50.2426	18.3105
	19.92	18.5265	56.3461	25.6348
	20.04	15.9351	51.4633	20.4468
	20.16	18.5317	56.9565	23.8037
	20.28	26.0111	52.684	19.8364
	20.4	20.0627	55.7358	21.9727
	20.52	20.5231	56.9565	28.3814
	20.64	23.1197	54.5151	19.5312
	20.76	13.5092	52.0737	24.7192
	20.88	18.5472	57.5668	18.3105
	21	23.5852	59.703	27.771
	21.12	15.1955	52.0737	18.3105
	21.24	23.2852	52.9892	25.6348
	21.36	19.4731	52.684	16.7847
	21.48	19.9335	51.7685	26.5503
	21.6	23.1404	66.7221	24.7192
	21.72	21.4645	53.9047	26.8555
	21.84	8.19194	57.5668	21.9727
	21.96	19.3334	56.3461	21.9727
	22.08	17.0472	56.9565	17.0898
	22.2	14.4558	55.4306	21.6675
	22.32	15.8317	52.9892	16.1743
	22.44	18.7335	63.6703	24.7192
	22.56	18.5834	63.06	29.2969
	22.68	9.88853	62.1444	19.2261
	22.8	20.7248	55.7358	28.3814
	22.92	12.3351	63.3652	26.8555
	23.04	22.2559	56.3461	21.0571
	23.16	25.1577	52.3788	17.7002
	23.28	14.9369	60.6186	24.1089
	23.4	15.7024	61.8393	15.2588
	23.52	14.3317	59.703	28.9917
	23.64	26.3887	58.7875	27.4658
	23.76	14.642	54.2099	16.7847
	23.88	23.6473	60.9237	25.0244
	24	20.7507	62.4496	14.6484
	24.12	21.2111	55.1254	25.6348
	24.24	20.4507	64.2807	26.2451
	24.36	26.0991	64.891	23.1934
	24.48	18.93	67.6376	24.1089
	24.6	24.2732	51.4633	26.2451
	24.72	17.4093	53.9047	21.0571
	24.84	20.0059	63.6703	28.0762
	24.96	21.9921	54.2099	19.8364
	25.08	21.2318	64.5859	22.8882
	25.2	23.218	59.703	23.1934
	25.32	20.9318	62.1444	22.583
	25.44	21.087	66.1117	23.8037
	25.56	26.4301	59.0927	24.1089
	25.68	20.4818	66.7221	22.2778
	25.8	17.8904	61.2289	18.6157
	25.92	16.8249	68.8583	23.1934
	26.04	20.9473	66.1117	19.2261
	26.16	29.6474	68.248	25.3296
	26.28	21.5628	67.3324	29.602
	26.4	22.6335	70.6894	24.7192
	26.52	17.6007	61.5341	22.8882
	26.64	23.5542	64.891	25.6348
	26.76	19.1318	64.5859	25.3296
	26.88	19.8973	61.5341	26.5503
	27	22.7991	64.2807	22.2778
	27.12	20.2077	61.5341	25.0244
	27.24	18.837	69.1635	26.5503
	27.36	20.518	64.5859	22.2778
	27.48	18.537	70.9946	29.602
	27.6	24.7956	65.8066	20.4468
	27.72	21.2887	69.7738	25.0244
	27.84	16.2559	66.1117	23.1934
	27.96	15.1904	68.5532	26.2451
	28.08	15.6507	67.9428	23.8037
	28.2	18.5525	63.06	29.2969
	28.32	26.9474	70.3842	27.771
	28.44	21.6094	58.7875	28.3814
	28.56	18.4077	74.0463	28.6865
	28.68	22.5301	71.2997	22.8882
	28.8	20.8543	69.7738	28.3814
	28.92	23.4508	63.6703	24.1089
	29.04	26.0474	62.1444	19.8364
	29.16	22.2353	65.5014	23.4985
	29.28	22.0853	78.0136	21.9727
	29.4	25.5974	71.9101	25.0244
	29.52	23.3112	65.5014	21.9727
	29.64	20.4146	65.8066	22.2778
	29.76	15.0766	74.0463	21.3623
	29.88	22.556	75.267	29.2969
	30	27.2888	61.5341	25.6348
	30.12	21.3405	71.2997	28.6865
	30.24	18.7491	74.3515	28.6865
	30.36	20.7353	72.2153	28.9917
	30.48	18.1439	63.9755	28.9917
	30.6	22.2664	68.8583	29.2969
	30.72	23.9474	65.1962	23.1934
	30.84	20.7457	68.248	30.8227
	30.96	15.1025	60.3134	23.1934
	31.08	23.4974	69.4687	30.2124
	31.2	27.0095	70.079	24.4141
	31.32	25.3336	65.8066	25.6348
	31.44	25.794	68.5532	28.0762
	31.56	18.9301	68.5532	24.7192
	31.68	12.3714	68.5532	28.3814
	31.8	26.5647	71.6049	24.7192
	31.92	26.1095	74.9618	26.5503
	32.04	21.9922	69.1635	25.0244
	32.16	24.2836	69.7738	23.1934
	32.28	25.6595	69.7738	31.4331
	32.4	26.7302	81.9809	21.6675
	32.52	31.463	66.4169	28.6865
	32.64	17.275	67.0273	27.1606
	32.76	30.2475	63.6703	29.9072
	32.88	22.7733	72.8256	21.9727
	33	29.032	69.7738	27.4658
	33.12	21.8629	68.248	32.959
	33.24	28.4268	70.6894	22.583
	33.36	22.4785	69.7738	31.1279
	33.48	20.1922	71.9101	27.1606
	33.6	17.6008	74.3515	32.3486
	33.72	22.3336	75.8774	30.2124
	33.84	17.9112	72.5204	27.771
	33.96	27.832	67.9428	28.6865
	34.08	24.3251	72.8256	25.3296
	34.2	25.7009	67.9428	19.5312
	34.32	25.2458	68.5532	23.8037
	34.44	20.5181	71.6049	28.0762
	34.56	26.7768	73.7411	29.2969
	34.68	19.9129	71.9101	28.0762
	34.8	28.0027	77.4032	28.6865
	34.92	26.3268	73.1308	25.3296
	35.04	15.8008	74.3515	30.5176
	35.16	24.1958	75.5722	24.4141
	35.28	28.3182	65.8066	26.5503
	35.4	27.5579	77.4032	23.8037
	35.52	25.5768	74.9618	31.4331
	35.64	26.6475	68.5532	26.8555
	35.76	25.8872	70.3842	25.9399
	35.88	33.3665	74.6567	27.771
	36	26.8079	69.4687	25.6348
	36.12	29.0993	74.3515	25.3296
	36.24	21.6251	78.6239	31.1279
	36.36	26.663	72.8256	29.9072
	36.48	28.0389	69.7738	27.771
	36.6	36.4338	74.3515	28.6865
	36.72	23.4664	71.9101	26.8555
	36.84	32.4717	78.6239	29.9072
	36.96	19.5043	73.7411	28.3814
	37.08	38.2752	81.9809	25.6348
	37.2	25.3079	73.7411	28.0762
	37.32	28.5148	78.3188	27.1606
	37.44	21.3457	76.1825	25.9399
	37.56	30.351	71.9101	32.6538
	37.68	23.182	68.5532	28.0762
	37.8	31.5769	72.8256	33.2642
	37.92	39.6666	77.0981	34.79
	38.04	21.5113	76.4877	25.9399
	38.16	28.6855	81.0653	33.2642
	38.28	35.8597	72.8256	27.771
	38.4	25.0286	77.0981	26.2451
	38.52	29.151	82.2861	22.8882
	38.64	14.0474	71.2997	26.2451
	38.76	30.9873	79.5395	30.8227
	38.88	35.7201	76.4877	32.3486
	39	29.4666	74.0463	28.6865
	39.12	28.0958	78.0136	29.9072
	39.24	30.3873	82.2861	28.6865
	39.36	29.3217	68.5532	31.1279
	39.48	19.7113	81.9809	33.8745
	39.6	34.5149	77.0981	31.4331
	39.72	26.4303	69.1635	24.1089
	39.84	26.2803	80.7602	26.8555
	39.96	29.4873	85.0326	30.2124
	40.08	30.558	79.8447	23.4985
	40.2	28.8821	73.1308	30.5176
	40.32	22.0182	88.9999	30.2124
	40.44	25.5303	75.267	25.6348
	40.56	26.9062	75.8774	31.4331
	40.68	28.8924	83.2016	27.4658
	40.8	23.2493	76.7929	33.5693
	40.92	28.8976	70.9946	31.1279
	41.04	27.8321	82.2861	37.2315
	41.16	21.5786	73.7411	31.7383
	41.28	26.3114	85.0326	35.7056
	41.4	33.4856	75.8774	30.5176
	41.52	34.8615	72.8256	32.0435
	41.64	27.9976	78.9291	26.2451
	41.76	29.3735	79.2343	32.0435
	41.88	29.5287	76.4877	30.8227
	42	28.4631	69.7738	31.7383
	42.12	30.7545	76.1825	30.5176
	42.24	25.1114	73.7411	31.1279
	42.36	24.0459	72.8256	31.7383
	42.48	28.1683	78.3188	25.9399
	42.6	36.8684	79.5395	30.8227
	42.72	31.8356	75.8774	32.6538
	42.84	34.127	77.4032	28.3814
	42.96	19.6337	83.5068	32.3486
	43.08	27.4183	79.8447	27.1606
	43.2	26.3528	77.7084	34.4849
	43.32	30.1701	75.267	24.4141
	43.44	29.1045	85.643	34.79
	43.56	26.5131	81.9809	35.0952
	43.68	25.1424	82.5912	30.5176
	43.8	27.1287	88.6947	27.771
	43.92	25.4528	81.9809	34.79
	44.04	35.6788	83.5068	27.4658
	44.16	34.0029	65.8066	36.3159
	44.28	28.0545	76.7929	32.959
	44.4	21.4959	83.2016	26.5503
	44.52	35.9943	72.8256	29.602
	44.64	34.3184	88.0844	35.4004
	44.76	25.0131	73.436	33.8745
	44.88	30.0511	72.8256	29.602
	45	35.0891	75.5722	28.9917
	45.12	31.5822	75.5722	30.2124
	45.24	22.2769	77.4032	36.6211
	45.36	34.9443	73.1308	30.8227
	45.48	33.8788	80.1498	34.4849
	45.6	30.0666	79.2343	31.7383
	45.72	27.1701	81.3705	33.5693
	45.84	31.2925	81.0653	26.2451
	45.96	25.9545	79.2343	28.9917
	46.08	30.6873	81.3705	31.1279
	46.2	27.4856	78.9291	27.771
	46.32	33.7443	87.7792	36.3159
	46.44	27.4908	79.8447	26.8555
	46.56	31.0029	70.3842	36.0107
	46.68	28.7167	77.4032	26.2451
	46.8	28.8718	74.6567	39.978
	46.92	38.7926	74.6567	32.6538
	47.04	41.084	83.8119	34.1797
	47.16	25.6752	71.9101	35.7056
	47.28	30.1029	84.4223	35.7056
	47.4	30.8684	86.8637	33.2642
	47.52	30.7184	78.0136	32.3486
	47.64	29.3477	71.2997	29.602
	47.76	38.353	85.9482	33.2642
	47.88	25.0804	82.5912	32.6538
	48	33.1702	82.8964	35.7056
	48.12	30.5788	87.474	33.5693
	48.24	32.565	79.2343	34.79
	48.36	31.1943	74.0463	37.8418
	48.48	31.0443	71.2997	33.5693
	48.6	28.7581	79.8447	30.5176
	48.72	41.4254	80.1498	38.7573
	48.84	35.7823	82.8964	35.7056
	48.96	31.0546	99.0707	31.7383
	49.08	38.534	78.0136	36.9263
	49.2	32.2805	75.8774	34.79
	49.32	24.5011	83.2016	33.8745
	49.44	36.5582	88.9999	34.1797
	49.56	40.0703	80.455	32.959
	49.68	33.8167	88.0844	31.1279
	49.8	36.4133	84.7275	30.2124
	49.92	34.7375	81.3705	35.0952
	50.04	26.0425	81.0653	32.6538
	50.16	26.1977	92.662	30.5176
	50.28	38.2547	74.9618	29.2969
	50.4	29.5598	79.5395	31.7383
	50.52	32.4616	90.831	31.4331
	50.64	43.9083	83.5068	39.0625
	50.76	29.1098	86.2533	34.4849
	50.88	30.4857	81.0653	39.3677
	51	34.6082	78.3188	30.2124
	51.12	39.6461	89.9155	37.5366
	51.24	33.6978	79.5395	34.4849
	51.36	34.4633	90.5258	31.7383
	51.48	35.2289	83.5068	40.5884
	51.6	41.1824	79.8447	34.1797
	51.72	33.7082	84.7275	29.602
	51.84	41.4927	81.6757	37.2315
	51.96	43.7841	86.5585	39.978
	52.08	34.4789	80.7602	33.8745
	52.2	35.8547	90.5258	36.6211
	52.32	39.3668	77.4032	37.2315
	52.44	29.7564	87.1689	33.2642
	52.56	43.6445	85.643	33.2642
	52.68	35.2547	86.5585	34.4849
	52.8	36.0203	80.455	38.147
	52.92	33.1237	85.0326	38.7573
	53.04	34.8047	76.7929	30.2124
	53.16	35.8754	86.8637	33.2642
	53.28	28.7064	81.3705	35.0952
	53.4	37.7117	78.3188	44.5557
	53.52	30.5426	80.1498	33.8745
	53.64	39.5479	88.0844	38.4522
	53.76	36.041	89.6103	37.5366
	53.88	36.1961	76.1825	36.3159
	54	38.1824	79.8447	36.0107
	54.12	43.8307	85.643	39.6728
	54.24	33.9151	82.8964	41.1987
	54.36	28.8823	83.8119	31.7383
	54.48	39.4134	86.2533	35.4004
	54.6	37.4324	80.7602	33.5693
	54.72	33.3151	84.7275	35.0952
	54.84	46.2876	91.7465	41.5039
	54.96	46.1377	88.9999	35.0952
	55.08	39.5789	89.9155	40.8935
	55.2	37.5979	78.3188	34.79
	55.32	42.3307	77.4032	40.8935
	55.44	43.7066	83.8119	32.3486
	55.56	38.0634	91.1362	33.8745
	55.68	34.8617	89.9155	39.3677
	55.8	36.5427	81.0653	32.0435
	55.92	43.7169	80.7602	41.1987
	56.04	38.6841	87.1689	40.2832
	56.16	36.3979	89.6103	36.9263
	56.28	35.9427	85.9482	37.8418
	56.4	33.0461	84.7275	35.0952
	56.52	41.1359	87.7792	39.978
	56.64	40.6807	91.4413	39.3677
	56.76	32.5962	82.5912	38.7573
	56.88	37.9393	89.6103	31.4331
	57	38.3997	85.0326	40.2832
	57.12	35.5031	83.8119	39.0625
	57.24	43.898	81.3705	40.5884
	57.36	38.2548	78.3188	44.8608
	57.48	36.8841	87.474	38.147
	57.6	41.6169	92.9672	36.0107
	57.72	35.3634	78.9291	39.0625
	57.84	47.7256	78.3188	37.2315
	57.96	36.2841	89.6103	38.4522
	58.08	45.8997	94.4931	34.1797
	58.2	35.0686	85.643	41.5039
	58.32	43.4635	85.9482	42.7246
	58.44	39.6514	90.831	42.1143
	58.56	38.5859	88.3896	36.9263
	58.68	34.7738	86.8637	33.8745
	58.8	41.0325	91.1362	36.0107
	58.92	40.8825	90.5258	41.5039
	59.04	39.2066	84.4223	37.8418
	59.16	46.686	94.7983	38.4522
	59.28	33.1082	87.1689	38.7573
	59.4	36.6204	88.6947	38.4522
	59.52	45.6256	97.2397	40.8935
	59.64	47.6119	92.0517	39.978
	59.76	34.6445	88.0844	39.3677
	59.88	35.1048	85.3378	37.8418
	60	39.5325	93.5776	35.0952
	60.12	41.5187	81.0653	34.4849
	60.24	42.8946	92.0517	39.3677
	60.36	32.9789	88.6947	38.7573
	60.48	51.7499	86.8637	42.4194
	60.6	41.8342	92.662	35.0952
	60.72	45.0412	91.7465	34.4849
	60.84	43.9756	89.6103	42.7246
	60.96	45.9619	85.3378	34.1797
	61.08	40.6239	85.643	39.978
	61.2	42.6101	87.1689	35.7056
	61.32	36.0514	88.0844	40.2832
	61.44	53.9068	85.643	42.7246
	61.56	44.2963	94.4931	39.978
	61.68	47.8085	88.9999	33.2642
	61.8	48.8792	85.3378	43.0298
	61.92	36.8273	90.5258	42.1143
	62.04	38.5084	92.0517	43.6401
	62.16	40.7998	82.8964	36.0107
	62.28	44.0067	88.9999	39.0625
	62.4	54.2327	91.7465	46.0815
	62.52	42.7912	93.2724	37.8418
	62.64	45.0826	89.6103	35.4004
	62.76	38.2187	90.5258	36.3159
	62.88	46.0033	92.662	37.2315
	63	41.886	91.4413	35.0952
	63.12	50.8913	92.3569	39.0625
	63.24	46.1636	97.2397	39.3677
	63.36	46.9291	85.3378	41.5039
	63.48	47.6947	94.1879	36.6211
	63.6	48.4602	88.6947	45.166
	63.72	40.3756	91.1362	38.7573
	63.84	35.3428	81.3705	42.7246
	63.96	44.6533	86.5585	34.79
	64.08	40.536	88.3896	39.6728
	64.2	44.0481	101.207	35.7056
	64.32	39.0153	91.4413	42.1143
	64.44	42.2222	99.0707	39.978
	64.56	43.5981	91.4413	40.2832
	64.68	47.1102	91.1362	34.4849
	64.8	45.1292	87.7792	39.978
	64.92	41.0119	91.7465	38.4522
	65.04	40.2515	93.5776	42.7246
	65.16	53.8344	89.6103	43.6401
	65.28	46.3602	85.643	43.0298
	65.4	44.9895	86.8637	42.1143
	65.52	39.3463	90.5258	42.7246
	65.64	55.0655	90.5258	43.9453
	65.76	38.7412	90.2206	46.6919
	65.88	48.0516	90.2206	43.6401
	66	44.8499	86.8637	41.5039
	66.12	54.1603	86.5585	37.5366
	66.24	56.4517	96.9345	44.2505
	66.36	48.062	92.0517	42.1143
	66.48	52.7948	95.7138	43.9453
	66.6	48.3723	92.3569	41.8091
	66.72	49.443	92.662	41.1987
	66.84	45.0206	95.4086	39.978
	66.96	48.2275	88.0844	46.6919
	67.08	45.0257	99.6811	40.5884
	67.2	52.5051	86.2533	44.5557
	67.32	49.6085	90.831	43.6401
	67.44	47.0171	95.7138	45.166
	67.56	48.6982	89.9155	47.6074
	67.68	52.2103	95.4086	40.5884
	67.8	45.9568	94.4931	37.8418
	67.92	51.6051	100.597	42.1143
	68.04	50.2344	88.9999	43.6401
	68.16	52.831	92.662	44.8608
	68.28	48.1034	87.1689	40.8935
	68.4	41.5447	94.4931	39.3677
	68.52	42.6154	85.643	43.335
	68.64	49.7896	89.3051	44.2505
	68.76	36.2119	96.3241	46.0815
	68.88	42.7757	84.1171	41.8091
	69	45.3723	93.5776	44.8608
	69.12	44.612	89.6103	38.7573
	69.24	48.7344	97.5448	44.2505
	69.36	44.9223	85.0326	46.3867
	69.48	47.8241	102.428	47.9126
	69.6	28.7532	88.3896	42.7246
	69.72	48.4396	93.8827	43.9453
	69.84	40.9654	88.3896	45.4712
	69.96	43.562	80.1498	47.9126
	70.08	47.6844	92.662	45.166
	70.2	51.5017	102.428	49.4385
	70.32	48.9103	88.6947	48.2178
	70.44	50.8965	89.6103	42.7246
	70.56	50.1362	82.8964	41.5039
	70.68	47.8499	99.0707	44.2505
	70.8	51.9724	93.8827	40.5884
	70.92	44.8034	94.7983	43.335
	71.04	49.5362	96.6293	39.3677
	71.16	46.0292	96.3241	43.335
	71.28	54.4242	94.7983	43.9453
	71.4	46.3396	95.4086	49.4385
	71.52	54.4293	88.9999	40.5884
	71.64	42.6827	87.1689	47.3023
	71.76	55.6552	96.6293	42.7246
	71.88	51.5379	93.5776	47.3023
	72	45.8948	93.8827	41.8091
	72.12	45.4396	82.8964	43.0298
	72.24	52.919	93.8827	44.8608
	72.36	55.8207	90.5258	44.8608
	72.48	48.6517	94.4931	42.1143
	72.6	50.6379	90.831	48.2178
	72.72	50.7931	90.831	42.1143
	72.84	56.7466	92.662	46.9971
	72.96	50.1879	92.3569	47.3023
	73.08	46.0707	91.7465	50.6592
	73.2	52.6345	99.9862	48.8281
	73.32	50.0431	94.1879	42.1143
	73.44	48.9776	97.5448	47.9126
	73.56	48.8276	99.6811	40.8935
	73.68	52.6449	91.4413	45.7764
	73.8	52.1897	82.2861	46.0815
	73.92	56.6173	81.9809	50.9644
	74.04	55.2466	100.291	44.5557
	74.16	58.7587	94.4931	51.8799
	74.28	54.6415	92.0517	48.8281
	74.4	56.6277	95.4086	46.6919
	74.52	52.2052	95.4086	44.2505
	74.64	57.5484	94.1879	43.0298
	74.76	59.8398	97.5448	40.5884
	74.88	67.9295	90.5258	45.166
	75	50.9949	102.123	43.6401
	75.12	52.6759	98.7656	47.3023
	75.24	54.357	94.7983	49.1333
	75.36	47.7983	99.0707	43.335
	75.48	56.4984	90.2206	50.0488
	75.6	49.9397	102.733	42.1143
	75.72	66.2692	98.4604	48.523
	75.84	52.6915	95.1034	51.5747
	75.96	55.288	99.6811	43.0298
	76.08	52.6966	91.7465	47.6074
	76.2	50.7156	101.817	44.8608
	76.32	59.4157	107.311	46.0815
	76.44	65.9795	98.4604	42.4194
	76.56	57.895	98.7656	49.7437
	76.68	55.3036	100.902	54.3213
	76.8	61.5622	100.902	44.8608
	76.92	51.6466	98.1552	49.4385
	77.04	56.9898	95.1034	45.7764
	77.16	56.5346	92.662	44.2505
	77.28	69.5072	96.9345	43.6401
	77.4	56.845	100.597	45.7764
	77.52	62.1881	94.4931	44.8608
	77.64	64.7847	92.3569	48.2178
	77.76	57.0053	102.123	46.9971
	77.88	66.0106	96.9345	47.9126
	78	65.2502	106.395	48.523
	78.12	71.5089	95.1034	51.5747
	78.24	60.983	91.1362	46.6919
	78.36	65.7158	98.1552	48.2178
	78.48	60.0726	101.512	48.8281
	78.6	60.533	94.4931	46.0815
	78.72	72.2848	92.9672	53.7109
	78.84	55.045	94.1879	51.5747
	78.96	59.4726	101.512	54.3213
	79.08	59.6278	104.869	54.0161
	79.2	57.9519	99.0707	52.7954
	79.32	44.069	100.902	49.7437
	79.44	57.0416	105.174	50.0488
	79.56	63.3002	93.2724	51.5747
	79.68	52.4691	94.7983	45.166
	79.8	57.8122	100.291	52.7954
	79.92	56.4416	97.2397	47.3023
	80.04	59.3433	96.6293	49.4385
	80.16	61.0244	103.343	52.1851
	80.28	55.9915	92.9672	51.8799
	80.4	60.4192	95.4086	52.7954
	80.52	55.3864	103.343	48.2178
	80.64	53.1001	89.6103	50.0488
	80.76	66.3779	101.512	59.5093
	80.88	57.0726	93.8827	45.4712
	81	56.3123	94.7983	51.5747
	81.12	57.383	115.245	50.354
	81.24	57.5381	103.343	51.5747
	81.36	69.29	92.9672	50.9644
	81.48	60.9002	99.0707	48.2178
	81.6	66.8538	97.85	49.4385
	81.72	74.9435	91.1362	53.4058
	81.84	73.2676	96.019	51.8799
	81.96	64.8779	91.4413	54.9316
	82.08	68.39	96.019	53.1006
	82.2	74.6487	99.0707	55.542
	82.32	68.3952	91.1362	48.2178
	82.44	68.2452	100.291	55.2368
	82.56	72.3676	99.9862	52.7954
	82.68	71.9125	107.005	52.1851
	82.8	58.6399	88.9999	49.7437
	82.92	70.6969	104.259	52.4902
	83.04	62.9175	101.817	54.6265
	83.16	69.4814	101.207	50.0488
	83.28	72.6883	97.5448	60.1196
	83.4	68.2659	108.531	53.1006
	83.52	69.6418	99.6811	43.9453
	83.64	72.5435	94.1879	47.3023
	83.76	65.3745	103.648	46.6919
	83.88	67.3607	103.038	50.6592
	84	67.5159	103.648	50.9644
	84.12	67.3659	93.8827	53.1006
	84.24	62.6382	100.597	56.7627
	84.36	61.2675	96.9345	48.8281
	84.48	71.4935	106.395	57.6782
	84.6	62.7986	92.9672	54.3213
	84.72	62.0382	105.174	54.6265
	84.84	59.1416	105.785	54.6265
	84.96	59.2968	99.9862	51.8799
	85.08	60.6727	95.1034	58.8989
	85.2	62.0486	104.869	55.542
	85.32	63.7296	99.9862	52.4902
	85.44	68.1573	99.9862	54.9316
	85.56	67.7021	93.8827	52.4902
	85.68	71.5194	99.9862	54.6265
	85.8	62.8245	94.7983	52.1851
	85.92	67.8625	110.667	49.1333
	86.04	67.4073	100.902	55.8472
	86.16	63.29	100.597	43.0298
	86.28	71.3797	103.954	56.1523
	86.4	70.009	103.038	57.6782
	86.52	64.3659	92.9672	60.1196
	86.64	70.0142	98.1552	55.8472
	86.76	71.0849	103.038	59.5093
	86.88	77.3436	105.174	54.9316
	87	69.5642	100.902	58.8989
	87.12	71.8556	108.531	53.1006
	87.24	69.5694	102.733	55.2368
	87.36	66.0624	104.869	48.523
	87.48	69.5746	100.597	54.6265
	87.6	79.1902	106.395	54.9316
	87.72	67.1383	98.4604	53.4058
	87.84	66.6832	103.954	49.4385
	87.96	73.8574	101.512	52.7954
	88.08	77.6746	101.207	58.5938
	88.2	79.0505	102.428	54.6265
	88.32	74.9333	103.343	59.2041
	88.44	64.4073	112.193	54.9316
	88.56	73.1074	104.259	52.7954
	88.68	72.347	109.752	54.9316
	88.8	82.573	99.0707	55.2368
	88.92	76.0143	91.7465	58.5938
	89.04	68.2349	101.512	56.1523
	89.16	72.3574	99.6811	54.3213
	89.28	84.4144	103.954	58.8989
	89.4	76.635	105.174	60.4248
	89.52	82.5885	95.7138	52.1851
	89.64	80.3023	103.954	57.6782
	89.76	65.1987	103.343	55.542
	89.88	75.7298	102.123	55.8472
	90	77.1057	109.141	58.5938
	90.12	76.3454	108.531	55.8472
	90.24	80.4678	100.902	51.5747
	90.36	76.6557	103.038	57.0679
	90.48	73.1488	99.0707	51.2695
	90.6	89.1731	100.597	57.0679
	90.72	71.6281	105.174	52.1851
	90.84	75.1402	97.85	62.561
	90.96	87.5024	103.954	54.6265
	91.08	77.2816	99.9862	60.73
	91.2	89.6438	96.6293	53.1006
	91.32	83.0851	107.921	57.0679
	91.44	91.1749	100.902	54.3213
	91.56	81.8696	93.8827	56.1523
	91.68	79.8885	102.733	61.3403
	91.8	95.9128	103.038	56.1523
	91.92	92.7111	106.09	53.4058
	92.04	80.0489	99.6811	57.9834
	92.16	86.6127	99.9862	58.5938
	92.28	77.0023	100.597	61.9507
	92.4	88.1438	98.1552	62.561
	92.52	74.2609	102.733	53.7109
	92.64	80.5196	103.954	60.73
	92.76	80.0644	103.954	54.9316
	92.88	82.9662	109.752	61.9507
	93	84.342	105.174	62.2559
	93.12	82.6662	108.226	52.4902
	93.24	81.9058	107.005	60.73
	93.36	85.7231	104.259	54.6265
	93.48	81.6058	105.479	63.1714
	93.6	85.4231	97.85	54.0161
	93.72	93.818	109.141	51.2695
	93.84	79.0196	97.2397	58.5938
	93.96	88.9404	96.9345	64.0869
	94.08	87.8748	109.752	56.1523
	94.2	86.5041	98.1552	67.1387
	94.32	75.9782	94.7983	57.0679
	94.44	85.2886	108.226	55.2368
	94.56	88.8007	103.343	60.73
	94.68	86.2093	100.291	58.2886
	94.8	86.9749	98.7656	57.373
	94.92	82.2472	99.9862	65.3076
	95.04	77.5196	110.667	63.7817
	95.16	77.0644	93.2724	59.8145
	95.28	79.661	100.902	57.373
	95.4	88.9714	105.174	57.0679
	95.52	82.4128	109.447	61.3403
	95.64	84.7041	100.902	64.6973
	95.76	86.6904	105.174	64.6973
	95.88	85.0145	105.174	57.6782
	96	90.6628	107.005	67.749
	96.12	92.9543	109.141	66.5283
	96.24	87.9214	110.973	60.1196
	96.36	87.1611	105.174	68.3594
	96.48	80.6024	101.207	56.7627
	96.6	92.0491	97.2397	61.0352
	96.72	86.4059	102.428	64.6973
	96.84	93.5801	109.141	61.0352
	96.96	91.9043	108.226	61.3403
	97.08	86.8714	111.583	67.749
	97.2	82.7541	108.531	57.6782
	97.32	88.7077	112.499	66.2231
	97.44	85.8111	104.564	63.4766
	97.56	86.2714	111.888	63.4766
	97.68	78.7972	101.512	57.0679
	97.8	96.3474	106.395	61.0352
	97.92	88.568	110.973	66.2231
	98.04	86.8921	103.343	60.1196
	98.16	75.7558	105.479	64.6973
	98.28	89.3387	120.433	65.0024
	98.4	85.8318	108.836	61.0352
	98.52	83.2404	103.038	65.6128
	98.64	89.8042	103.038	68.9697
	98.76	88.1284	106.395	66.2231
	98.88	91.9457	103.343	64.0869
	99	82.9456	102.428	58.8989
	99.12	97.1388	103.343	66.2231
	99.24	85.3921	103.343	61.0352
	99.36	91.0405	116.466	66.2231
	99.48	98.2147	103.954	62.561
	99.6	104.473	112.499	61.6455
	99.72	91.2008	104.869	63.7817
	99.84	102.647	110.667	66.8335
	99.96	94.5629	105.479	68.6646
	100.08	99.6009	111.583	63.7817
	100.2	94.8733	108.836	60.73
	100.32	98.6906	111.583	72.6318
	100.44	91.8267	105.479	71.7163
	100.56	98.0854	110.362	59.8145
	100.68	103.734	110.973	62.8662
	100.8	98.3958	99.0707	68.3594
	100.92	104.96	110.057	60.1196
	101.04	100.232	112.804	61.9507
	101.16	99.1664	108.836	61.9507
	101.28	109.392	104.869	69.8852
	101.4	109.242	111.583	70.4956
	101.52	119.163	108.836	70.8008
	101.64	107.722	107.616	68.6646
	101.76	104.215	114.635	69.5801
	101.88	115.662	111.583	64.0869
	102	107.577	105.785	65.6128
	102.12	109.563	103.954	61.6455
	102.24	103.31	115.245	60.73
	102.36	102.855	108.836	64.6973
	102.48	95.6854	108.836	62.561
	102.6	101.639	113.414	68.3594
	102.72	96.6061	117.076	65.918
	102.84	112.325	114.329	66.8335
	102.96	110.649	112.193	68.0542
	103.08	108.974	109.752	69.5801
	103.2	108.518	113.414	63.4766
	103.32	119.049	104.869	72.3267
	103.44	107.608	118.907	62.8662
	103.56	105.322	109.141	71.4111
	103.68	103.951	110.057	60.4248
	103.8	105.632	112.499	68.6646
	103.92	111.586	112.193	65.0024
	104.04	107.773	105.785	64.0869
	104.16	104.572	114.635	66.5283
	104.28	117.544	115.245	72.0215
	104.4	98.1682	112.499	69.2749
	104.52	107.174	104.869	66.5283
	104.64	111.906	121.043	69.2749
	104.76	114.808	113.109	68.6646
	104.88	104.892	110.667	71.4111
	105	111.151	117.076	72.6318
	105.12	102.761	117.686	72.0215
	105.24	107.189	106.7	71.7163
	105.36	110.396	115.55	70.8008
	105.48	101.396	112.499	67.749
	105.6	116.2	116.771	72.6318
	105.72	105.063	117.992	69.2749
	105.84	103.387	118.297	69.8852
	105.96	115.444	115.855	75.0732
	106.08	99.7303	113.414	66.2231
	106.2	105.379	109.141	71.7163
	106.32	110.417	108.531	67.749
	106.44	114.539	109.752	69.8852
	106.56	109.811	107.616	75.0732
	106.68	102.032	115.245	68.0542
	106.8	108.291	112.193	71.7163
	106.92	108.446	114.024	62.8662
	107.04	115.62	112.193	71.106
	107.16	120.048	111.278	65.0024
	107.28	116.236	114.024	68.9697
	107.4	117.306	110.057	74.1577
	107.52	119.293	118.602	68.3594
	107.64	119.753	121.043	76.9043
	107.76	118.993	109.141	69.2749
	107.88	109.382	118.602	68.9697
	108	122.66	117.076	70.1904
	108.12	124.646	117.992	79.3457
	108.24	118.698	108.531	73.2422
	108.36	132.586	114.94	76.9043
	108.48	119.618	121.959	69.5801
	108.6	98.1062	114.635	73.8525
	108.72	101.008	113.719	79.0405
	108.84	108.487	113.719	70.1904
	108.96	119.019	122.874	70.4956
	109.08	109.103	115.855	74.4629
	109.2	112.31	113.109	72.3267
	109.32	113.075	123.485	71.4111
	109.44	122.081	114.329	74.1577
	109.56	130.476	115.55	73.8525
	109.68	122.696	114.024	78.125
	109.8	120.715	119.212	71.106
	109.92	125.448	114.635	72.0215
	110.04	123.772	117.686	74.1577
	110.16	111.415	107.005	71.106
	110.28	118.284	115.855	75.3784
	110.4	125.153	119.212	69.2749
	110.52	133.243	108.836	78.7353
	110.64	137.976	112.193	75.6836
	110.76	131.112	124.4	75.0732
	110.88	121.196	121.349	78.7353
	111	127.15	112.499	75.9888
	111.12	126.084	113.414	75.9888
	111.24	128.375	128.062	72.937
	111.36	122.732	114.94	74.4629
[truncated: 72 more rows]
[truncated: 174 more columns]
