# Supplementary material for: Cell-autonomous regulation of epithelial cell quiescence by calcium channel Trpv6
Source: eLife. 2019 Sep 17;8:e48003. doi: 10.7554/eLife.48003 (PMC6764821; doi:10.7554/eLife.48003)
Supplement: Figure 3—source data 1. [file elife-48003-fig3-data1.xlsx]

## Sheet: Sheet1
	Figure 3A
	120hpf WT Nca	120hpf WT LCa	120hpf HE Nca	120hpf HE LCa	120hpf HO Nca	120hpf HO LCa
	91	248	113	295	320	222
	54	189	87	276	226	278
	114	263	82	111	265	480
	80	280	92	326	381	184
	93	310	42	251	298	72
	87		81	456	221	234
	91		86	267		444
			88	170		380
			92	393		192
				214		146
				255		176
				317		489
				370		280
				256		131
				240
				259
				328
	Figure 3B
	WT DMSO	trpv6 Δ8+/- DMSO	trpv6 Δ8-/- DMSO	WT BMS	trpv6 Δ8+/- BMS	trpv6 Δ8-/- BMS		WT DMSO	trpv6 Δ7+/- DMSO	trpv6 Δ7-/- DMSO	WT BMS	trpv6 Δ7+/- BMS	trpv6 Δ7-/- BMS
	0	1	8	0	0	0		0	2	24	0	1	1
	1	0	12	2	0	0		0	0	25	0	0	0
	1	0	44	0	0	0		0	1	14	0	0	0
	0	0	45	0	0	0		0	0	4	0	0	9
	6	5	36	0	5	1		2	0	23	4	0	0
	0	0	22	1	6	4		0	0	24	0	2	2
	5	0	14	6	4				1		6	0	0
	0	0	50	5	0				0		0	0	1
	2	0	16	0	0				5			1
	0	0	64	2	1				0			0
	0	0	6		0				5			1
	0	0	2						2			0
	0	0	8						1			0
	0	0	27						0			3
	0	0	36						1
	0	0	27						0
	1	0	10						0
	0	1	0						0
	0	0	8						0
		5	1
		5	14
		9	64
		2	38
		0	62
		0	33
		1
		0
		0
		0
		0
		1
		0
		0
		0
		0
		0
		0
	Figure 3C
	WT DMSO	trpv6 Δ8+/- DMSO	trpv6 Δ8-/- DMSO	WT BMS	trpv6 Δ8+/- BMS	trpv6 Δ8-/- BMS		WT DMSO	trpv6 Δ7+/- DMSO	trpv6 Δ7-/- DMSO	WT BMS	trpv6 Δ7+/- BMS	trpv6 Δ7-/- BMS
	75	114	127	60	34	71		28	82	161	97	93	75
	43	49	105	69	63	63		111	127	216	43	90	65
	30	23	74	60	51	71		66	88	150	92	92	116
	56	54	81	89	71	71		111	83	154	91	105	50
	44	62	76	34	55	64		46	68	144	101	114	116
	58	71	88	59	44	71		54	78		63	98	64
	43	51	81	37	33	51		70	86		84	94	88
	39	42	95	22	37	34		76	64		58	57
	87	34	67		34	60		82	104		97	97
	61	42			45			70	93			48
	81	62			41			64	68			97
	64	76			69			44	87			100
	34	43			32			50	117			99
	62	35			35			51	77			123
	77	59			27				61			52
		39			78				78			101
		45			37				57			141
					83				131			106
					40							81
												46
												168
												30
												86
												83
												117
	Figure 3E
		-	+	++	+++
	WT DMSO	8.33333	75	8.33333	8.33333
	WT U	50	41.6667	8.33333	0
	HE DMSO	20.8333	54.1667	25	0
	HE U	78.9474	21.0526	0	0
	HO DMSO	0	0	50	50
	HO U	30	70	0	0
	Figure 3F
	WT DMSO	WT BMS	trpv6 Δ8+/- DMSO	trpv6 Δ8+/- BMS	trpv6 Δ8-/- DMSO	trpv6 Δ8-/- BMS		WT DMSO	WT BMS	trpv6 Δ7+/- DMSO	trpv6 Δ7+/- BMS	trpv6 Δ7-/- DMSO	trpv6 Δ7-/- BMS
	90	102	88	137	229	66		91	33	113	86	320	72
	121	116	90	149	270	66		54	102	87	81	226	29
	96	79	77	107	218	56		114	73	82	81	265	31
	50	70	98	94	247	70		80	98	92	92	381	55
	72	64	73	50	317	114		93	61	42	53	298	22
	54	47	102	65	169	80		87	64	81	84	221	0
	71	71	65	85	248	54		91	60	86	77		17
	93		88	75	317	48		75	63	88	82		45
	72		92	131	168	40		73	15	92	106		45
	105		85	94	311	23		53	40	47	83
	125		157	54	419	18		73	38	68	84
	104		59	133	160					63	83
	95		115	90							54
	58		86	86							55
			81	12							86
			78	101							51
			36	79							75
			84	15							91
				71							32
				87							58
											49
											59
	Figure 3G							Figure 3H							Figure 3I
	WT DMSO	WT Wortmannin	HE DMSO	HE Wortmannin	HO DMSO	HO Wortmannin		WT DMSO	WT Rapamycin	HE DMSO	HE Rapamycin	HO DMSO	HO Rapamycin		WT DMSO	WT U0126	HE DMSO	HE U0126	HO DMSO	HO U0126
	84	75	113	99	316	36		84	77	113	100	316	29		84	87	113		316	167
	96	86	92	75	231	121		96	80	92	127	231	39		96	67	92	88	231	61
	66	79	76	74	166	121		66	91	76	58	166	30		66	30	76	59	166	184
	58	95	60	81	143	40		58	66	60	77	143	30		58	69	60	59	143	237
	73	67	101	92	161	96		73	96	101	78	161	14		73	81	101	64	161	73
	35	84	58	100	85	71		35	86	58	68	85	24		35	48	58	62	85	96
	88	93	71	116	114	133		88	77	71	87	114	35		88	46	71	69	114	79
			70	97	326	115			56	70	50	326	47			65	70	80	326	31
			84	89	198	91			63	84	80	198	30			80	84	44	198	83
			71	155	153	99			55	71	71	153					71	80	153	103
			71	49		59			73	71	57						71	82		137
			94	70		70			84	94	66						94	89
			63	133		108				63	87						63	80
			81	70		153				81	67						81	69
			75	96						75	74						75	56
			87							87	90						87	57
			62							62							62	68
			77							77							77	79
			110							110							110	63
																		73
