# Supplementary material for: Cell-autonomous regulation of epithelial cell quiescence by calcium channel Trpv6
Source: eLife. 2019 Sep 17;8:e48003. doi: 10.7554/eLife.48003 (PMC6764821; doi:10.7554/eLife.48003)
Supplement: Figure 4—source data 1. [file elife-48003-fig4-data1.xlsx]

## Sheet: Sheet1
	Figure 4A
		Negative	GCaMP7a-positive
	siblings	52	48
	trpv6-/-	100	0
	Figure 4C					Figure 4D
	siblings beofre Ionomycin	sibling +ionomycin	trpv6 beofre Ionomycin	trpv6 +ionomycin		Trpv6-mCh negative	Trpv6-mCh negative + Ionomycin	Trpv6-mCh positive	Trpv6-mCh positive + Ionomycin
	0.16642	0.165	0.00568	0.04		-0.043	0.126	0.145	0.214
	0.134	0.162	0.004016	0.02352		-0.032	0.101	0.241	0.2427
	0.039	0.045	0.006	0.052		-0.002304	0.194	0.229	0.139
	0.076	0.11	0.009	0.053		0	0.144	0.454	0.511
	0.072	0.11	-0.007	0.031		0.030971	0.358	0.447578	0.532
	0.123	0.244	-0.010656	0.015		0.01	0.274	0.133	0.153
	0.082	0.074	0.01	0.023		0.194	0.46479	0.055	0.00504
	0.13442	0.143	-0.006	0.029712		0.056	0.133	0.07	0.129
	0.242104	0.21624	0	0.077		0.038	0.146	0.091	0.126
	0.133157	0.165	0.004	0.036		0.034	0.228	0.443	0.458
	0.10942	0.14	-0.002152	0.187		0.02362	0.147	0.291	0.32
	0.165	0.24624	0.002	0.104		0.01093	0.105	0.373	0.434
	0.048	0.041	0.007848	0.09		0.014	0.128	0.142	0.176
	0.012	0.012	0.025092	0.132		0.012	0.146
	0.032	0.05	0.027	0.044		0.036	0.201
	0.029	0.04524	0.017008	0.06252		0.006	0.091
	0.03	0.05024	-0.004	0.079472		0.017	0.068
	0	-0.000442	-0.005	0.045		-0.02506	0.238
	0.014	0.015	-0.00432	0.037		-0.016	0.1727
	0.015	0.02513	-0.003	0.042		0.095	0.186
	0.018023	0.023	0	0.034		0.038955	0.109
	0.062	0.067	-0.002	0.03476		-0.006	0.068
	0.024	0.042	0	0.034		0.02	0.175
	0.006	0.016	0.001	0.068		0.004	0.188
	0.021445	0.01813	-0.005	0.049		-0.093	0.07
	0.024	0.021	-0.002	0.036		-0.011	0.213
	0.01	0.007	-0.173	0.172		-0.011	0.314
	0.029734	0.011	0.009	0.083		-0.002422	0.142
	0.014	0.012452	0.005	0.084		-0.007	0.076
	0.011445	0.015	-0.005	0.073		0.026	0.171
	0.015	0.013	-0.013	0.036		0.08606	0.148
	0.009734	0.009	0.025	0.185		0.069	0.19464
	0.012	0.007	0.004	0.078		0.015	0.149
	0.013	0.008	-0.003	0.064		-0.056	0.058
	0.032	0.022	0	0.079		-0.03	0.015
	0.014	0.011	-0.019	0.039		-0.046	0.0456
	0.028	0.03	-0.031	0.059		0.091	0.232
	0.112	0.2102	-0.029	0.113025		0.1	0.30504
	0.083	0.11464	0	0.074		0.064	0.2
	0.09772	0.111	-0.009	0.08
	0.025	0.063	0.04	0.142		Figure 4G
	0.114	0.114	0.04	0.118		Time (min)	GCaMP7a																													mCherry
	0.07	0.077	0.04	0.09254		0	100	100	100	100	100	100	100	100	100	100	100	100	100	100	100	100	100	100	100	100	100	100	100	100	100	100	100	100	100	100	100	100	100	100
	0.135	0.18	0.048	0.123		4	93.6673	94.2351	69.0652	86.3928	91.637	99.336	96.126	85.0188	88.552	92.901	84.173	84.1332	100.081	99.2923	135.643	82.0484	125.687	83.8814	84.1221	87.3368	99.5005	79.3395	75.7167	89.563	83.222	84.2446	61.7372	59.6502	66.2999	89.4535	92.9135	100.425	100.712	96.643
	0.08	0.10546	0.044	0.156		8	83.2328	103.983	58.753	70.2785	91.019	105.563	95.968	85.0063	81.13	45.628	46.489	56.7924	65.179	56.3499	87.3069	60.2575	74.6572	71.3938	68.5618	37.4072	50.5921	48.7522	50.5109	46.4572	44.6848	48.2923	42.1241	52.9416	37.5376	93.5838	96.4333	94.129	78.4344	84.285
	0.125	0.117	0.021	0.172		12	70.9846	40.2494	32.8372	33.7215	78.597	99.21	88.226	81.4399	70.8461	30.858	29.268	46.3262	37.9552	38.2765	32.6382	43.9365	43.58	51.8704	49.7582	27.9016	38.813	33.2245	32.671	35.3341	30.0873	31.2928	33.6439	29.8349	22.9414	91.9693	97.5214	85.348	86.9009	85.5836
	0.148	0.176	0.02752	0.151		16	67.6621	44.1506	44.0141	26.219	23.377	35.873	27.436	51.57	37.527	28.971	30.418	37.2979	35.2977	35.1966	34.7995	43.8594	31.3119	51.843	53.5627	25.7845	31.383	26.3007	25.9367	36.2802	21.9349	20.3144	27.2966	20.9447	17.814	86.1193	89.6087	83.669	79.4495	82.7073
	0.111	0.12604	0.033	0.12		20	70.0908	62.9802	62.2015	27.0968	23.315	31.0175	25.611	40.5274	34.166	29.633	31.624	46.0781	51.3845	30.3539	45.7484	35.7914	38.6009	54.3528	58.9906	26.0365	33.4405	29.1289	31.3653	35.5074	23.9809	26.4455	33.5654	28.0136	24.0418	84.3681	82.0924	94.253	71.5656	84.6184
	0.124	0.139	0.022	0.111		24	67.4786	34.8591	39.8145	27.7724	22.176	30.274	24.342	51.4692	34.411	30.183	29.862	71.6332	114.428	75.0917	39.4919	78.529	84.7254	72.587	88.2901	42.3612	46.1767	48.0539	53.4417	60.4406	39.982	48.7228	49.1456	51.1334	41.7264	88.4984	78.6868	86.645	75.8215	91.3905
	0.082	0.114	0.013512	0.10963		28	64.5804	34.6809	38.361	31.0312	22.3488	32.7776	24.5345	50.992	31.267	42.965	29.8922	100.2	191.906	125.721	73.4572	130.04	161.065	95.2272	134.329	53.6664	69.899	71.0416	51.4902	74.5323	55.926	63.8619	60.7884	59.9319	49.4567	90.6634	80.131	78.81	80.5309	91.8052
	0.116	0.145	0.022138	0.087		32	76.5236	37.1431	80.8937	56.0874	22.331	33.269	26.384	49.6902	30.48	97.462	86.7	100.537	205.487	113.558	187.297	129.882	174.239	108.551	146.956	58.4405	72.2465	73.6973	60.8785	76.5764	71.8163	73.5469	65.4	59.4667	50.5802	87.81	79.6541	85.187	89.3323	95.7011
	0.161	0.143	0.046	0.085		36	110.28	153.762	186.508	109.128	84.682	79.749	93.031	81.1846	60.911	92.246	88.86	91.3784	220.387	103.971	174.908	144.303	185.957	114.524	142.121	65.4592	78.9045	76.4208	72.9776	75.9119	73.2831	79.8619	71.002	67.9114	57.8113	82.4146	77.2326	80.708	83.7403	90.7702
	0.15972	0.104	0.013512	0.092
	0.086	0.069	0.015	0.131		Figure 4H			Figure 4I
	0.072	0.064	0.023	0.111		DMSO	BAPTA-AM		DMSO	BAPTA-AM
	0.08372	0.082	0.035	0.134		92	166		0	19
	0.097	0.064	0.026	0.119		71	197		0	36
	0.20572	0.133	0.063	0.141		109	184		0	24
	0.073	0.068	0.013	0.158		87	141		0	45
	0.074	0.1115	0.039	0.17335		119	179		0	16
	0.171	0.18092	0.051	0.217		92	201		0	46
	0.064	0.0622	0.067	0.324		69	162		0	41
	0.085	0.087	0.04	0.113		129	193		0	26
	0.032	0.037	0.039	0.2169		105	144		0	50
	0.056	0.054	0.031	0.1179		100	178		0	20
	0.11854	0.104	0.001	0.181		92	153		0	31
	0.125	0.116	-0.017	0.12		107	132		0	29
	0.116	0.10464	0.045	0.164		105	179		0	24
	0.037	0.059	0.073	0.183		93	179		0	29
	0.021304	0.0122	0.041	0.184		108	137		0	30
	0.01	0.0416	0.086	0.223		123	85
	0.03	0.029	0.083	0.198		82	137
	0.127	0.14	0.023	0.123			161
	0.1614	0.166	0.022	0.084			129
	0.19	0.166	-0.019	0.12
	0.111	0.088	0.026	0.141676
	0.267	0.348	-0.01213	0.101
	0.036	0.08	0.00955	0.096
	0.14	0.189	-0.014	0.139
	0.11	0.169	-0.019	0.128
	0.245	0.216	-0.0033	0.079364
	0.177	0.348	-0.005	0.082
	0.124	0.162	0.007	0.111
	0.102	0.156	0.022	0.229566
	0.057	0.083	-0.011	0.106
	0.049	0.064	-0.008	0.123
	0.142	0.18	-0.02	0.089
	0.148	0.142	-0.024	0.140202
	0.223	0.256	-0.017875	0.084
	0.276	0.258	-0.023	0.124624
	0.155	0.161	-0.026	0.101
	0.051	0.069	-0.02596	0.108
	0.035	0.062	-0.025	0.122
	0.162	0.203	-0.026	0.162
	0.164	0.228	-0.008	0.14
	0.143	0.157	-0.03	0.126
	0.251	0.28118	-0.03362	0.131
	0.214	0.326	-0.019	0.11652
	0.127	0.115	-0.013	0.144
	0.093	0.1788	-0.018	0.131
	0.0934	0.127	-0.008	0.18552
	0.172	0.237	-0.02	0.113
	0.17	0.259	0.019	0.11752
	0.084	0.0968	0.0127	0.09252
	0.058	0.107	0.003	0.087
	0.102	0.152	0.026	0.186
	0.103	0.202	0.023	0.111
	0.119	0.192	0.01	0.159884
	0.13	0.14848	-0.005	0.1
	0.08	0.114	0.014	0.20678
	0.1424	0.171	-0.013	0.129
	0.065	0.06464	-0.007	0.12
	0.056	0.0778	-0.00268	0.0904
	0.155	0.157	-0.029	0.04318
	0.239	0.2919	-0.019344	0.045
	0.06716	0.077	-0.013	0.049
	0.147	0.181	-0.01152	0.047
	0.251	0.23225	0	0.015
	0.074	0.075	-0.011	0.034
	0.032528	0.057	-0.00468	0.064
	0.116	0.126	-0.003	0.103
	0.063	0.125	-0.001	0.06
	0.061	0.096	-0.018	0.132
	0.045	0.08	-0.001	0.064
	0.117	0.05225	-0.006	0.1134
	0.068	0.083	-0.01	0.085
	0.078	0.067	0.002	0.076
	0.06	0.09	-0.004	0.099
	0.11916	0.138	0.002	0.062
	0.09116	0.103	0.005	0.082
	0.146	0.1882	0.013	0.129
	0.274	0.296	0.028	0.1764
	0.33	0.336	-0.014	0.039
	0.221	0.401	-0.003	0.052
	0.052	0.068	0.009	0.136
	0.147	0.15485	0.003	0.084
	0.104	0.0805	0.025	0.149
	0.12	0.08595	0.016824	0.157
	0.108	0.196	0.01	0.102
	0.115	0.104	-0.024	0.081
	0.158	0.13	-0.01268	0.059
	0.121	0.06	-0.019	0.07
	0.09716	0.154	-0.034	0.062
	0.163	0.254	-0.024	0.064
	0.168	0.223	-0.05068	0.074
	0.24	0.226	-0.047848	0.115
			-0.03868	0.0704
			-0.01	0.128
			-0.036	0.164
			-0.021	0.148
			-0.018	0.11
			-0.02626	0.1
			-0.052	0.116
			-0.027	0.071
			-0.019	0.07529
			-0.028044	0.057412
			-0.023852	0.10792
			0.146148	0.13092
			0.01801	0.149936
			0.019478	0.12119
			0.021946	0.098936
			0.04901	0.119904
			0.02902	0.112174
			0.125148	0.207412
			0.012148	0.119428
			0.013946	0.26738
			0.01368	0.124682
			0.01735	0.11538
			0.002222	0.19065
			-0.015054	0.12865
			0.070754	0.20665
			0.052552	0.206602
			0.031616	0.148888
			0.010084	0.176618
			0.008148	0.242618
			0.020552	0.25638
			0.032754	0.236126
			-0.023916	0.145412
			-0.008384	0.137682
			0.004286	0.130904
			-0.009054	0.123174
			-0.007714	0.073412
			0.032148	0.119634
			0.036084	0.13592
			0.00201	0.110412
			0.01701	0.096682
			0.03468	0.115904
			0.022212	0.125682
			0.039148	0.099412
			0.038818	0.112888
			-0.004852	0.14692
			-0.010852	0.145412
			-0.018852	0.056174
			-0.012586	0.060396
			0.004882	0.132412
			-0.01298	0.060412
			-0.000182	0.099396
			0.042286	0.170666
			0.035616	0.183396
			0.046084	0.178364
			0.000158	0.161412
			-0.011916	0.150396
			-0.003916	0.115174
			0.011084	0.132412
			0.011148	0.10219
			-0.006522	0.06292
			0.037158	0.153888
			-0.001256	0.106904
			-0.003384	0.094634
			-0.003044	0.080602
			0.007084	0.13411
			-0.019384	0.096904
			0.018	0.087
			0.002948	0.131
			0.031	0.119
			0.025843	0.065
			0.017	0.113
			0	0.069
			0.027	0.1234
			-0.002	0.119
			0.028	0.118825
			0.059	0.203
			-0.006	0.06
			0.075	0.138
			0.024	0.144
			0.024	0.09
			0.02958	0.087
			0.038	0.15925
			0.035	0.178825
			0.086	0.205
			-0.003	0.093
			0.04337	0.137
			-0.01	0.113
			0.061	0.179675
			0.067	0.268
			0.04137	0.1368
			0.01	0.117
			-0.001	0.076
