# Supplementary material for: Cell-autonomous regulation of epithelial cell quiescence by calcium channel Trpv6
Source: eLife. 2019 Sep 17;8:e48003. doi: 10.7554/eLife.48003 (PMC6764821; doi:10.7554/eLife.48003)
Supplement: Figure 5—source data 1. [file elife-48003-fig5-data1.xlsx]

## Sheet: Sheet1
	Figure 5A								Figure 5B
	4dpf NCa DMSO	4dpf NCa OA	4dpf NCa OA+BMS	5dpf NCa DMSO	5dpf NCa OA	5dpf NCa OA+BMS			4dpf NCa DMSO	4dpf NCa Calyculin	4dpf NCa Calyculin+BMS	5dpf NCa DMSO	5dpf NCa Calyculin	5dpf NCa Calyculin+BMS
	57	69	46	94	128	105			44	59	140	80	127	183
	65	93	87	107	246	107			105	85	79	79	97	29
	54	88	80	89	183	89			92	90	73	70	141	54
	73	115	55	85	162	84			68	96	72	92	127	78
	62	82	54	87	174	82			74	111	95	112	159	81
	66	96	46	107	230	126			81	92	66	106	143	74
	65	108	57	126	224	84			84	100	95	117	105	82
	77	86	75	90	181	56			88	89	47	54	92	106
	59	101	87	83	256	57			91	97	83	82	97	101
	68	129	85	55	219	113			79	105	58	113	108	73
	84	70	84	96	77	89			83	108	105	63	166	160
	60	86	65	94	151	103			104	93	77	29	127	138
	92	68	64	94	203	128			85	94	51	67	33	96
	78	91	93	73	167				94	85	89	63	79	106
										71	97	57	106	52
											71	73	113
												29	113
	Figure 5C											20	112
	DMSO	OA	OA+Wortmannin	OA+Rapamycin	OA+U0126							42	67
	118	166	116	74	107							62	101
	94	200	119	67	99							51	126
	92	242	152	83	95							60	260
	77	191	131	80	88							52	107
	81	178	68	81	91							47	85
	89	289	197	68	133							25	137
	69	218	111	96	96							84	271
	85	167	115	111	66							110	238
	120	141	83	110	96							97	189
	42	161	108	100	93							91	149
	111	216	116	105	93							104	200
	81	145	137	100	111							104	203
	67	185	154	101	71							83	255
	32	212	110	86	93							74	174
	71	166	91	66	80							92	303
	73	186	110	75	96							97	209
	83	260		70	124							65	265
	59	221		93	89							110
	102	187		96								105
	Figure 5D
	NCa DMSO	NCa OA	Nca +OA + BMS		NCa DMSO	NCa +Calyculin	NCa+ Calyculin +BMS
	5	32	2		0	7	1
	0	59	3		0	11	0
	0	55	2		0	15	0
	0	75	1		6	5	0
	0	4	4		0	4	1
	0	11	2		0	2	0
	0	25	3		0	3	0
	0	11	4		0	7	0
	0	29	0		0	3	1
	0	52	0		1		1
	0	8	0		0		0
	0	34	0		0		0
	0	54	0		0		0
	0	22	0		0		0
	0	36	0		0		0
		3	0		1		0
							0
							0
	Figure 5E					Figure 5F
		-	+	++		Uninjected	pp2a112/Cas9
	Uninjected	91.2999	8.7001	0		1	0
	pp2a112/Cas9	82.8496	15.3034	1.84697		0	2
						0	3
						1	1
						0	3
						0	1
						3	3
						0	1
						0	2
						1	2
						0	2
						0	8
						0	0
						0	0
						5	0
						1	1
						0	9
						0	8
						0	0
						0	2
						3
