# Supplementary material for: Cell-autonomous regulation of epithelial cell quiescence by calcium channel Trpv6
Source: eLife. 2019 Sep 17;8:e48003. doi: 10.7554/eLife.48003 (PMC6764821; doi:10.7554/eLife.48003)
Supplement: Figure 6—source data 1. [file elife-48003-fig6-data1.xlsx]

## Sheet: Sheet1
	Figure 6A
	siCTRL	siTRPV6
	5.744	7.576
	5.452	7.05133
	4.90967	7.027
	Figure 6B
	DMSO	100 µM RR	100 µM Gd	20 nM OA	2.5 nM Calyculin	100 µM BAPTA-AM
	5.315	9.186	9.163	14.234	6.332	10.732
	5.425	9.527	9.04	12.915	6.657	9.732
	5.699	9.402	10.256	12.526	6.996	10.434
	Figure 6C
	Vector	PP2A-CαL199P	PP2A-CαH118N
	5.78	8.13	7.41
	6.3	8.32	7.7
	5.74	7.86	7.1
	4.68	5.85	6.07
	5.59	6.71	6.4
	5.58	6.42	6.56
	5.55	6.16	6.14
	5.48	6.54	6.6
	5.43	6.42	6.38
